# Supplementary material
Source: Royal Society of Chemistry journal article supplement (doi:10.1039/d6cc01087c)

## Supporting Information

# Thiosulfonate synthesis via halothiolation of aryne intermediates followed by oxidative *S*-sulfonylation

Yusei Yamamoto, Shinya Tabata, Koyo Numata and Suguru Yoshida\*

*Department of Biological Science and Technology, Faculty of Advanced Engineering,  
Tokyo University of Science, 6-3-1 Nijuku, Katsushika-ku Tokyo 125-8585  
E-mail: s-yoshida@rs.tus.ac.jp*

### Contents

|                                                                      |            |
|----------------------------------------------------------------------|------------|
| <b>General Information</b>                                           | <b>S2</b>  |
| <b>Structures of Aryne Precursors 1 and 19</b>                       | <b>S3</b>  |
| <b>Experimental Procedures</b>                                       | <b>S4</b>  |
| <b>Characterization Data of New Compounds</b>                        | <b>S13</b> |
| <b>References for Supporting Information</b>                         | <b>S22</b> |
| <b><sup>1</sup>H and <sup>13</sup>C NMR Spectra of New Compounds</b> | <b>S23</b> |

## General Information

All reactions were performed with dry glassware under an atmosphere of argon, unless otherwise noted. Analytical thin-layer chromatography (TLC) was performed on precoated (0.25 mm) silica-gel plates (Merck Chemicals, Silica Gel 60 F254, Cat. No. 1.05715). Column chromatography was conducted using silica-gel (Kanto Chemical Co., Inc., Silica Gel 60N, spherical neutral, particle size 40–50  $\mu\text{m}$ , Cat. No. 37562-85 or particle size 63–210  $\mu\text{m}$ , Cat. No. 37565-85). Preparative TLC (PTLC) was performed on silica gel (Wako Pure Chemical Industries Ltd., Wakogel B-5F, Cat. No. 230-00043). Melting points (Mp) were measured on an OptiMelt MPA100 (Stanford Research Systems) and are uncorrected.  $^1\text{H}$  NMR spectra were obtained with a Bruker AVANCE 400 spectrometer at 400 MHz.  $^{13}\text{C}$  NMR spectra were obtained with a Bruker AVANCE 400 spectrometer at 101 MHz.  $^{19}\text{F}$  NMR spectra were obtained with a Bruker AVANCE 400 spectrometer at 376 MHz. All NMR measurements were carried out at 25  $^\circ\text{C}$ .  $\text{CDCl}_3$  or acetone- $d_6$  was used as a solvent for obtaining NMR spectra. Chemical shifts ( $\delta$ ) are given in parts per million (ppm) downfield from the solvent peak ( $\delta$  7.26 for  $^1\text{H}$  NMR in  $\text{CDCl}_3$ ,  $\delta$  77.0 for  $^{13}\text{C}$  NMR in  $\text{CDCl}_3$ ;  $\delta$  2.04 for  $^1\text{H}$  NMR in acetone- $d_6$ ,  $\delta$  29.8 for  $^{13}\text{C}$  NMR in acetone- $d_6$ , or  $\alpha,\alpha,\alpha$ -trifluorotoluene ( $\delta$  –63.0 ppm for  $^{19}\text{F}$  NMR in  $\text{CDCl}_3$ ) as an internal reference with coupling constants ( $J$ ) in hertz (Hz). The abbreviations s, d, t, q, m, and br signify singlet, doublet, triplet, quartet, multiplet, and broad, respectively. IR spectra were measured on a Shimadzu IRSpirit spectrometer with the absorption band given in  $\text{cm}^{-1}$ . High-resolution mass spectra (HRMS) were measured on a JEOL JMS-T100CS “AccuTOF CS” mass spectrometer under positive electrospray ionization ( $\text{ESI}^+$ ) conditions or negative electrospray ionization ( $\text{ESI}^-$ ) conditions, or JMS-700 (JEOL, Tokyo, Japan) mass spectrometer under electron impact ionization (EI) conditions.

Unless otherwise noted, materials obtained from commercial suppliers were used without further purification. 4,5-dimethyl-2-(trimethylsilyl)phenyl trifluoromethanesulfonate (**1a**),<sup>S1</sup> 2-(trimethylsilyl)phenyl trifluoromethanesulfonate (**1b**),<sup>S1</sup> 4,5-difluoro-2-(trimethylsilyl)phenyl trifluoromethanesulfonate (**1c**),<sup>S1</sup> 4,5-dimethoxy-2-(trimethylsilyl)phenyl trifluoromethanesulfonate (**1d**),<sup>S1</sup> 6-(trimethylsilyl)benzo[*d*][1,3]dioxol-5-yl trifluoromethanesulfonate (**1e**),<sup>S2</sup> 3-methoxy-2-(trimethylsilyl)phenyl trifluoromethanesulfonate (**1f**),<sup>S3</sup> 3-((4-methoxyphenyl)thio)-2-(trimethylsilyl)phenyl trifluoromethanesulfonate (**1g**),<sup>S4</sup> 3-morpholino-2-(trimethylsilyl)phenyl trifluoromethanesulfonate (**1h**),<sup>S5</sup> 5-azido-3-methoxy-2-(trimethylsilyl)phenyl trifluoromethanesulfonate,<sup>S6</sup> 3-fluoro-2-iodophenyl trifluoromethanesulfonate (**19a**),<sup>S7</sup> 3-(benzyloxy)-2-iodophenyl trifluoromethanesulfonate (**19b**),<sup>S8</sup> and 4-iododibenzo[*b,d*]furan-3-yl trifluoromethanesulfonate (**19c**)<sup>S9</sup> were prepared according to the reported methods.

## Structures of Aryne Precursors 1 and 19

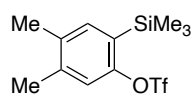

**1a**

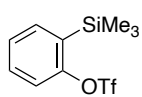

**1b**

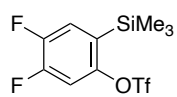

**1c**

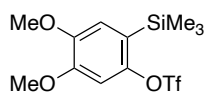

**1d**

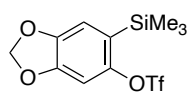

**1e**

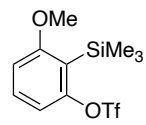

**1f**

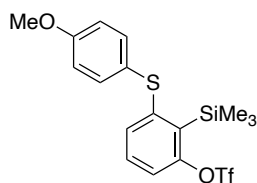

**1g**

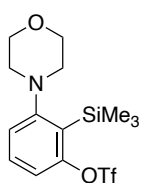

**1h**

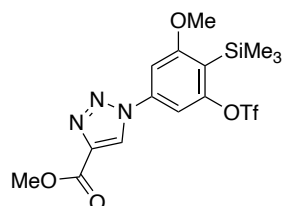

**1j**

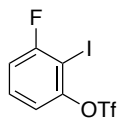

**19a**

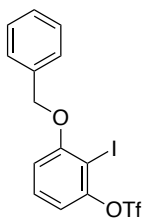

**19b**

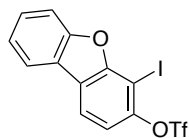

**19c**

## Experimental Procedures

### Synthesis of methyl 1-(3-methoxy-5-(((trifluoromethyl)sulfonyl)oxy)-4-(trimethylsilyl)phenyl)-1*H*-1,2,3-triazole-4-carboxylate (**1j**)

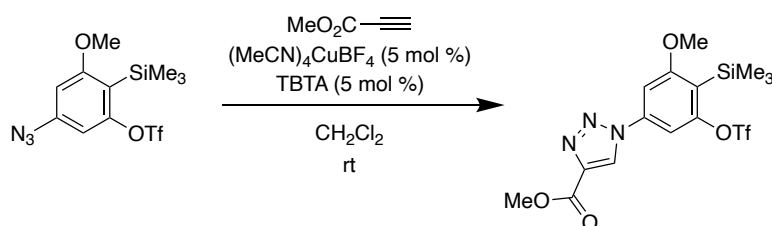

To a solution of 5-azido-3-methoxy-2-(trimethylsilyl)phenyl trifluoromethanesulfonate (670 mg, 1.82 mmol) and methyl propiolate (302 mg, 3.60 mmol, 2.0 equiv) in CH<sub>2</sub>Cl<sub>2</sub> (19.0 mL) were added (MeCN)<sub>4</sub>CuBF<sub>4</sub> (28.2 mg, 89.6 μmol, 5 mol %) and tris((1-benzyl-1*H*-1,2,3-triazol-4-yl)methyl)amine (TBTA) (47.4 mg, 89.3 μmol, 5 mol %) at room temperature. After stirring for 12 h at the same temperature, to the mixture was added water (20 mL). The mixture was extracted with CH<sub>2</sub>Cl<sub>2</sub> (20 mL × 3). The combined organic extract was washed with brine (10 mL) and dried with Na<sub>2</sub>SO<sub>4</sub>. After filtration, the filtrate was concentrated under reduced pressure. The residue was purified by flash column chromatography (silica-gel 50 g, *n*-hexane/EtOAc = 5/1) to give methyl 1-(3-methoxy-5-(((trifluoromethyl)sulfonyl)oxy)-4-(trimethylsilyl)phenyl)-1*H*-1,2,3-triazole-4-carboxylate (**1j**) (806 mg, 1.78 mmol, 98%) as a colorless solid.

### A typical procedure for thiosulfonate synthesis from aryl xanthates

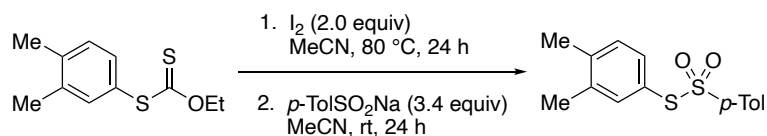

In a 5 mL screw-top V-vial<sup>®</sup> with a solid-top cap (Sigma–Aldrich, Cat. No. Z115118), to a mixture of *S*-(3,4-dimethylphenyl) *O*-ethyl carbonodithioate (**2a**) (11.3 mg, 50.0 μmol, 1.00 equiv) and CH<sub>3</sub>CN (0.50 mL) was added I<sub>2</sub> (25.4 mg, 0.100 mmol, 2.00 equiv) at room temperature. The mixture was stirred at 80 °C for 24 h. After the resulting mixture was cooled to room temperature, to the mixture was added sodium *p*-toluenesulfinate (30.3 mg, 0.170 mmol, 3.40 equiv) at the same temperature. After stirring for 24 h at the same temperature, to the mixture were added an aqueous saturated Na<sub>2</sub>S<sub>2</sub>O<sub>3</sub> (2 mL + 10 mL) and EtOAc (10 mL). The mixture was extracted with EtOAc (5 mL × 3). The combined organic extract was washed with brine (10 mL). The extract was dried with Na<sub>2</sub>SO<sub>4</sub>. After filtration, the filtrate was concentrated under reduced pressure. The residue was purified by preparative TLC (*n*-hexane/EtOAc = 4/1) to give *S*-(3,4-dimethylphenyl) 4-methylbenzenesulfonothioate (**3a**) (12.7 mg, 43.5 μmol, 87%) as a colorless solid.

According to the procedure for preparing *S*-(3,4-dimethylphenyl) 4-methylbenzenesulfonothioate, *S*-(3,4-difluorophenyl) 4-methylbenzenesulfonothioate (**3c**) (7.7 mg, 51%), *S*-(3,4-dimethoxyphenyl) 4-methylbenzenesulfonothioate (**3d**) (12.7 mg, 80%), *S*-(3-((4-methoxyphenyl)thio)phenyl) 4-methylbenzenesulfonothioate (**3g**) (12.1 mg, 60%), methyl 1-(3-methoxy-5-(tosylthio)phenyl)-1*H*-1,2,3-triazole-4-carboxylate (**3j**) (4.7 mg, 52%), *S*-(2-bromo-4,5-dimethylphenyl) 4-methylbenzenesulfonothioate (**5a**) (14.8 mg, 80%), *S*-(2-bromo-4,5-difluorophenyl) 4-methylbenzenesulfonothioate (**5c**) (10.9 mg, 57%), *S*-(2-bromo-3-methoxyphenyl) 4-methylbenzenesulfonothioate (**5f**) (15.4 mg, 84%), *S*-(2-chloro-4,5-dimethylphenyl) 4-methylbenzenesulfonothioate (**9a**) (12.3 mg, 74%), *S*-(2-iodo-4,5-dimethylphenyl) 4-methylbenzenesulfonothioate (**10a**) (7.9 mg, 76%), *S*-(2-iodophenyl) 4-methylbenzenesulfonothioate (**10b**) (19.5 mg, 98%), *S*-(2-iodo-4,5-dimethoxyphenyl) 4-methylbenzenesulfonothioate (**10d**) (18.5 mg, 75%), *S*-(6-iodobenzo[d][1,3]dioxol-5-yl) 4-methylbenzenesulfonothioate (**10e**) (20.4 mg, 71%), *S*-(2-iodo-3-methoxyphenyl) 4-methylbenzenesulfonothioate (**10f**) (10.7 mg, 51%), and *S*-(2-iodo-3-((4-methoxyphenyl)thio)phenyl) 4-methylbenzenesulfonothioate (**10g**) (13.8 mg, 67%) were prepared from the corresponding aryl xanthates.

### Synthesis of 5-morpholinobenzo[*d*][1,3]dithiol-2-one (**4**)

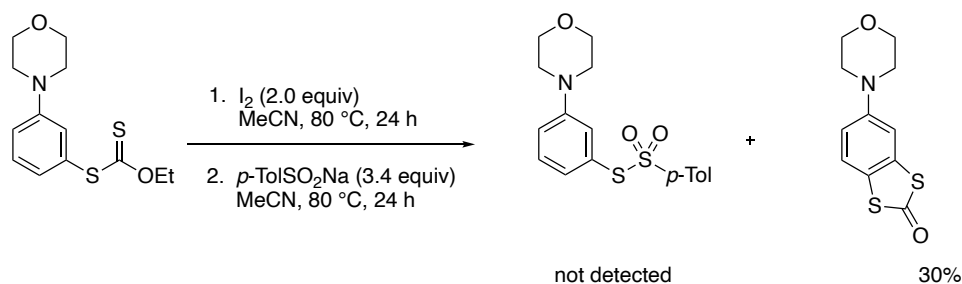

In a 5 mL screw-top V-vial<sup>®</sup> with a solid-top cap (Sigma–Aldrich, Cat. No. Z115118), to a mixture of *O*-ethyl *S*-(3-morpholinophenyl) carbonodithioate (**2h**) (44.5 mg, 0.157 mmol, 1.00 equiv) and CH<sub>3</sub>CN (1.50 mL) was added I<sub>2</sub> (159.9 mg, 0.630 mmol, 4.01 equiv) at room temperature. The mixture was stirred at 80 °C for 24 h. After the resulting mixture was cooled to room temperature, to the mixture was added sodium *p*-toluenesulfinate (30.3 mg, 0.170 mmol, 3.40 equiv) at room temperature. After stirring at 80 °C for 24 h, to the mixture was added an aqueous saturated Na<sub>2</sub>S<sub>2</sub>O<sub>3</sub> (2 mL + 10 mL) and EtOAc (10 mL) at room temperature. The mixture was extracted with EtOAc (5 mL × 3). The combined organic extract was washed with brine (10 mL). The extract was dried with Na<sub>2</sub>SO<sub>4</sub>. After filtration, the filtrate was concentrated under reduced pressure. The residue was purified by preparative TLC (*n*-hexane/EtOAc = 4/1) to give 5-morpholinobenzo[*d*][1,3]dithiol-2-one (**4**) (11.9 mg, 47.0 μmol, 30%) as a colorless solid.

### A typical procedure for the hydrothiolation of arynes from potassium xanthate

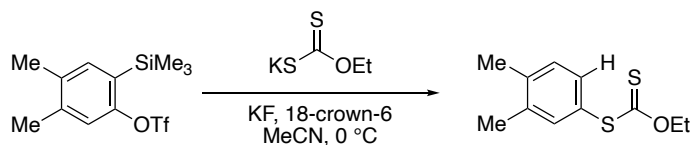

In a 5 mL screw-top V-vial<sup>®</sup> with a solid-top cap (Sigma–Aldrich, Cat. No. Z115118), to a mixture of 4,5-dimethyl-2-(trimethylsilyl)phenyl triflate (**1a**) (48.8 mg, 0.150 mmol, 1.50 equiv) and potassium *O*-ethyl dithiocarbonate (16.0 mg, 99.8 μmol) dissolved in CH<sub>3</sub>CN (1.30 mL) were added 18-crown-6-ether (105 mg, 0.400 mmol, 4.01 equiv) and potassium fluoride (17.4 mg, 0.300 mmol, 3.01 equiv) at 0 °C. After stirring for 24 h at the same temperature, the mixture was warmed to room temperature. To the mixture were added water (2 mL + 10 mL) and EtOAc (10 mL). The mixture was extracted with EtOAc (10 mL × 3). The combined organic extract was washed with brine (10 mL). The extract was dried with Na<sub>2</sub>SO<sub>4</sub>. After filtration, the filtrate was concentrated under reduced pressure. The residue was purified by preparative TLC (*n*-hexane/EtOAc = 4/1) to give *S*-(3,4-dimethylphenyl) *O*-ethyl carbonodithioate (**2a**) (18.7 mg, 82.8 μmol, 83%) as a yellow oil.

Similarly, *S*-aryl *O*-ethyl carbonodithioates **2b–j** were prepared from the corresponding *o*-silylaryl triflates.

### A typical procedure for the bromothiolation of arynes from potassium xanthate and bromopentafluorobenzene

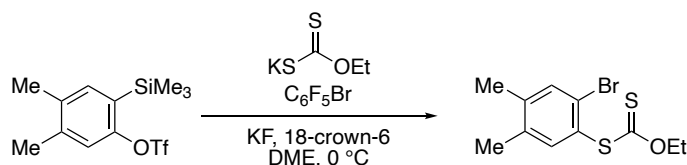

In a 5 mL screw-top V-vial<sup>®</sup> with a solid-top cap (Sigma–Aldrich, Cat. No. Z115118), to a mixture of 4,5-dimethyl-2-(trimethylsilyl)phenyl triflate (**1a**) (48.8 mg, 0.150 mmol, 1.50 equiv) and potassium *O*-ethyl dithiocarbonate (16.0 mg, 99.8 μmol) dissolved in 1,2-dimethoxyethane (1.30 mL) were added bromopentafluorobenzene (63.3 μL, 0.500 mmol, 5.01 equiv), 18-crown-6-ether (105 mg, 0.400 mmol, 4.01

equiv), and potassium fluoride (17.4 mg, 0.300 mmol, 3.01 equiv) at 0 °C. After stirring for 24 h at the same temperature, the mixture was warmed to room temperature. To the mixture were added water (2 mL + 10 mL) and EtOAc (10 mL). The mixture was extracted with EtOAc (10 mL × 3). The combined organic extract was washed with brine (10 mL). The extract was dried with Na<sub>2</sub>SO<sub>4</sub>. After filtration, the filtrate was concentrated under reduced pressure. The residue was purified by preparative TLC (*n*-hexane/EtOAc = 4/1) to give *S*-(2-bromo-4,5-dimethylphenyl) *O*-ethyl carbonodithioate (**6a**) (20.9 mg, 68.6 μmol, 69%) as a yellow solid.

Similarly, *S*-aryl *O*-ethyl carbonodithioates **6b**, **6c**, and **6f** were prepared from the corresponding *o*-silylaryl triflates.

*A typical procedure for the chlorothiolation of arynes from potassium xanthate and tetrachloromethane*

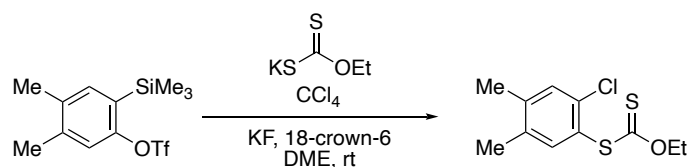

In a 5 mL screw-top V-vial<sup>®</sup> with a solid-top cap (Sigma–Aldrich, Cat. No. Z115118), to a mixture of 4,5-dimethyl-2-(trimethylsilyl)phenyl triflate (**1a**) (49.0 mg, 150 μmol, 1.50 equiv) and potassium *O*-ethyl dithiocarbonate (16.0 mg, 99.8 μmol) dissolved in 1,2-dimethoxyethane (1.30 mL) were added tetrachloromethane (48.4 μL, 0.500 mmol, 5.01 equiv), 18-crown-6-ether (105 mg, 0.400 mmol, 4.01 equiv), and potassium fluoride (17.4 mg, 0.300 mmol, 3.01 equiv) at room temperature. After stirring for 24 h at the same temperature, to the mixture were added water (2 mL + 10 mL) and EtOAc (10 mL). The mixture was extracted with EtOAc (10 mL × 3). The combined organic extract was washed with brine (10 mL). The extract was dried with Na<sub>2</sub>SO<sub>4</sub>. After filtration, the filtrate was concentrated under reduced pressure. The residue was purified by preparative TLC (*n*-hexane/EtOAc = 4/1) to give *S*-(2-chloro-4,5-dimethylphenyl) *O*-ethyl carbonodithioate (**7a**) (22.7 mg, 87.2 μmol, 87%) as a colorless solid.

Similarly, *S*-aryl *O*-ethyl carbonodithioate **7b** was prepared from the corresponding *o*-silylaryl triflate.

*A typical procedure for the iodination of arynes from potassium xanthate and (iodoethynyl)benzene*

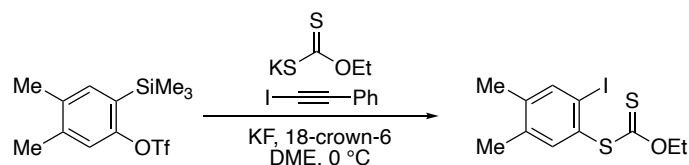

In a 5 mL screw-top V-vial<sup>®</sup> with a solid-top cap (Sigma–Aldrich, Cat. No. Z115118), to a mixture of 4,5-dimethyl-2-(trimethylsilyl)phenyl triflate (**1a**) (49.0 mg, 150 μmol, 1.50 equiv) and potassium *O*-ethyl dithiocarbonate (16.0 mg, 99.8 μmol) dissolved in 1,2-dimethoxyethane (1.30 mL) were added (iodoethynyl)benzene (63.3 μL, 0.500 mmol, 5.01 equiv), 18-crown-6-ether (105 mg, 0.400 mmol, 4.01 equiv), and potassium fluoride (17.4 mg, 0.300 mmol, 3.01 equiv) at 0 °C. After stirring for 24 h at the same temperature, the mixture was warmed to room temperature. To the mixture were added water (2 mL + 10 mL) and EtOAc (10 mL). The mixture was extracted with EtOAc (10 mL × 3). The combined organic extract was washed with brine (10 mL). The extract was dried with Na<sub>2</sub>SO<sub>4</sub>. After filtration, the filtrate was concentrated under reduced pressure. The residue was purified by preparative TLC (*n*-hexane/EtOAc = 4/1) to give *S*-(2-iodo-4,5-dimethylphenyl) *O*-ethyl carbonodithioate (**8a**) (24.6 mg, 69.9 μmol, 70%) as a yellow solid.

Similarly, *S*-aryl *O*-alkyl carbonodithioates **8b** and **8d–g** were prepared from the corresponding *o*-silylaryl triflates.

### Synthesis of bis(3,4-dimethylphenyl) disulfide (**11a**)

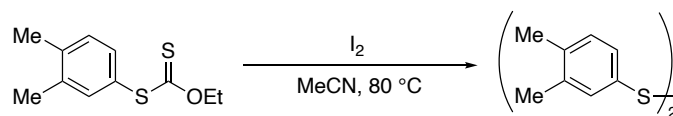

In a 5 mL screw-top V-vial<sup>®</sup> with a solid-top cap (Sigma–Aldrich, Cat. No. Z115118), to a mixture of *S*-(3,4-dimethylphenyl) *O*-ethyl carbonodithioate (**2a**) (11.3 mg, 50.0 μmol) and CH<sub>3</sub>CN (0.50 mL) was added I<sub>2</sub> (25.4 mg, 0.100 mmol, 2.00 equiv) at room temperature. The mixture was stirred at 80 °C for 24 h. After the resulting mixture was cooled to room temperature, to the mixture were added an aqueous saturated Na<sub>2</sub>S<sub>2</sub>O<sub>3</sub> (2 mL + 10 mL) and EtOAc (10 mL). The mixture was extracted with EtOAc (5 mL × 3). The combined organic extract was washed with brine (10 mL). The extract was dried with Na<sub>2</sub>SO<sub>4</sub>. After filtration, the filtrate was concentrated under reduced pressure. The residue was purified by preparative TLC (*n*-hexane/EtOAc = 20/1) to give 1,2-bis(3,4-dimethylphenyl)disulfane (**11a**) (6.9 mg, 25 μmol, quant) as a colorless solid.

### Synthesis of ethyl(naphthalen-2-yl)sulfane (**13**)

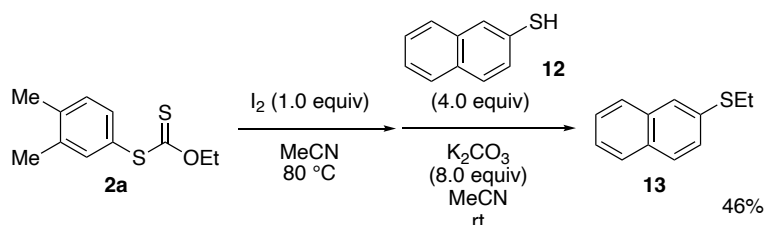

In a 5 mL screw-top V-vial<sup>®</sup> with a solid-top cap (Sigma–Aldrich, Cat. No. Z115118), to a mixture of *S*-(3,4-dimethylphenyl) *O*-ethyl carbonodithioate (**2a**) (58.9 mg, 0.182 mmol) and CH<sub>3</sub>CN (1.80 mL) was added I<sub>2</sub> (46.0 mg, 0.181 mmol, 1.00 equiv) at room temperature. The mixture was stirred at 80 °C for 24 h. After the resulting mixture was cooled to room temperature, to the mixture was added a solution of naphthalene-2-thiol (**12**) (116.8 mg, 0.730 mmol, 4.01 equiv) and potassium carbonate (201.2 mg, 1.456 mmol, 8.00 equiv) dissolved in MeOH (2.0 mL) at room temperature. After stirring for 24 h at the same temperature, to the mixture was added an aqueous saturated Na<sub>2</sub>S<sub>2</sub>O<sub>3</sub> (2 mL + 10 mL) and EtOAc (10 mL). The mixture was extracted with EtOAc (5 mL × 3). The combined organic extract was washed with brine (10 mL). The extract was dried with Na<sub>2</sub>SO<sub>4</sub>. After filtration, the filtrate was concentrated under reduced pressure. The residue was purified by preparative TLC (*n*-hexane/CH<sub>2</sub>Cl<sub>2</sub> = 4/1) to give ethyl(naphthalen-2-yl)sulfane (**13**) (15.8 mg, 83.9 μmol, 46%) as a colorless oil.

### Synthesis of *S*-(3,4-dimethylphenyl) 4-methylbenzenesulfonylthioate from bis(3,4-dimethylphenyl) disulfide (**3a**)

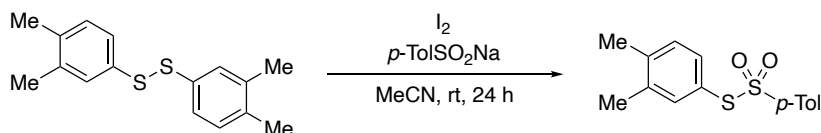

In a 5 mL screw-top V-vial<sup>®</sup> with a solid-top cap (Sigma–Aldrich, Cat. No. Z115118), to a mixture of 1,2-bis(3,4-dimethylphenyl) disulfide (**11a**) (6.9 mg, 25 μmol) and CH<sub>3</sub>CN (0.50 mL) were added I<sub>2</sub> (12.7 mg, 50.0 μmol, 2.00 equiv) and sodium *p*-toluenesulfonate (30.3 mg, 0.170 mmol, 6.80 equiv) at room temperature. The mixture was stirred at 80 °C for 24 h. After the resulting mixture was cooled to room temperature, to the mixture were added an aqueous saturated Na<sub>2</sub>S<sub>2</sub>O<sub>3</sub> (2 mL + 10 mL) and EtOAc (10 mL). The mixture was extracted with EtOAc (5 mL × 3). The combined organic extract was washed with brine (10 mL). The extract was dried with Na<sub>2</sub>SO<sub>4</sub>. After filtration, the filtrate was concentrated under reduced pressure. The residue was purified by preparative TLC (*n*-hexane/EtOAc = 4/1) to give *S*-(3,4-dimethylphenyl) 4-methylbenzenesulfonylthioate (**3a**) (12.1 mg, 41.4 μmol, 83%) as a colorless solid.

### Synthesis of 3,4-dimethylphenyl 4-methoxyphenyl sulfide (**15a**)

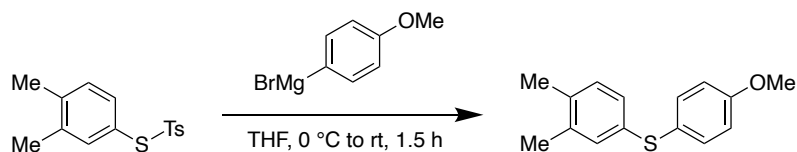

To a solution of *S*-(3,4-dimethylphenyl) 4-methylbenzenesulfonothioate (**3a**) (10.5 mg, 35.9  $\mu\text{mol}$ ) dissolved in THF (2.0 mL) was slowly added (4-methoxyphenyl)magnesium bromide (**14**) (2.0 M, THF solution, 35.9  $\mu\text{L}$ , 72  $\mu\text{mol}$ , 2.0 equiv) at 0 °C. After the addition was complete, the mixture was allowed to warm to room temperature and stirred for 1.5 h at the same temperature. Then, to the mixture was added an aqueous saturated ammonium chloride (5 mL). The mixture was extracted with EtOAc (5 mL  $\times$  3), and the filtrate was concentrated under reduced pressure. The residue was purified by preparative TLC (*n*-hexane/EtOAc = 4/1) to give 3,4-dimethylphenyl 4-methoxyphenyl sulfide (**15a**) (8.2 mg, 34  $\mu\text{mol}$ , 94%) as a yellow solid.

### Synthesis of ethyl 4-((3,4-dimethylphenyl)thio)benzoate (**15b**)

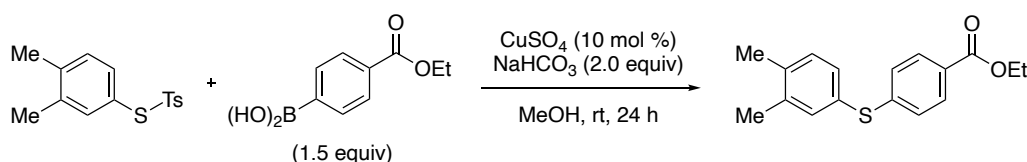

In a 5 mL screw-top V-vial<sup>®</sup> with a solid-top cap (Sigma–Aldrich, Cat. No. Z115118), to a mixture of  $\text{CuSO}_4$  (0.8 mg, 5  $\mu\text{mol}$ , 10 mol %) and  $\text{NaHCO}_3$  (8.4 mg, 0.10 mmol, 2.0 equiv) was added a solution of (4-(ethoxycarbonyl)phenyl)boronic acid (**16a**) (10.2 mg, 75.0  $\mu\text{mol}$ , 1.50 equiv) and *S*-(3,4-dimethylphenyl) 4-methylbenzenesulfonothioate (17.1 mg, 50.0  $\mu\text{mol}$ ) dissolved in MeOH (0.50 mL) at room temperature. After stirring for 24 h at the same temperature, to the mixture was added an aqueous saturated ammonium chloride (2 mL + 10 mL). The mixture was extracted with EtOAc (5 mL  $\times$  3). The combined organic extract was washed with brine (10 mL). The extract was dried with  $\text{Na}_2\text{SO}_4$ . After filtration, the filtrate was concentrated under reduced pressure. The residue was purified by preparative TLC (*n*-hexane/EtOAc = 10/1) to give ethyl 4-((3,4-dimethylphenyl)thio)benzoate (**15b**) (13.3 mg, 46.4  $\mu\text{mol}$ , 93%) as a colorless oil.

### Synthesis of 3-(((3,4-dimethylphenyl)thio)ethynyl)thiophene (**15c**)

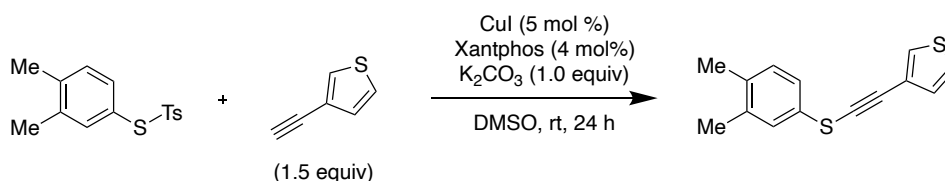

In a 5 mL screw-top V-vial<sup>®</sup> with a solid-top cap (Sigma–Aldrich, Cat. No. Z115118), to a mixture of  $\text{CuI}$  (0.6 mg, 3  $\mu\text{mol}$ , 5 mol %), Xantphos (1.5 mg, 2.6  $\mu\text{mol}$ , 4.0 mol %), and  $\text{K}_2\text{CO}_3$  (8.9 mg, 64  $\mu\text{mol}$ , 1.0 equiv) was added a solution of *S*-(3,4-dimethylphenyl) 4-methylbenzenesulfonothioate (**3a**) (18.9 mg, 64.5  $\mu\text{mol}$ ) and 3-ethynylthiophene (**17**) (10.5 mg, 96.8  $\mu\text{mol}$ , 1.50 equiv) dissolved in DMSO (0.43 mL) at room temperature. After stirring for 24 h at the same temperature, the mixture was filtrated through a pad of Celite and washed with EtOAc (5 mL). The filtrate was concentrated under reduced pressure. The residue was purified by preparative TLC (*n*-hexane/EtOAc = 10/1) to give 3-(((3,4-dimethylphenyl)thio)ethynyl)thiophene (**15c**) (14.4 mg, 58.9  $\mu\text{mol}$ , 91%) as a colorless oil.

### Synthesis of 2-bromophenyl *p*-tolyl sulfide

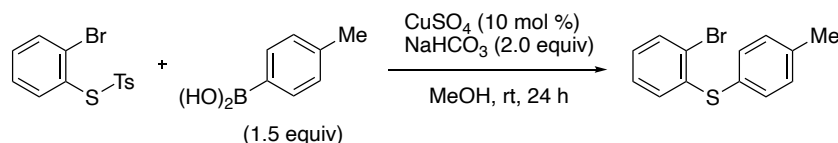

In a 5 mL screw-top V-vial<sup>®</sup> with a solid-top cap (Sigma–Aldrich, Cat. No. Z115118), to a mixture of CuSO<sub>4</sub> (0.8 mg, 5 μmol, 10 mol %) and NaHCO<sub>3</sub> (8.4 mg, 0.10 mmol, 2.0 equiv) was added a solution of *p*-tolylboronic acid (**16b**) (10.2 mg, 75.0 μmol, 1.50 equiv) and *S*-(2-bromophenyl) 4-methylbenzenesulfonothioate (17.1 mg, 50.0 μmol) dissolved in MeOH (0.50 mL) at room temperature. After stirring for 24 h at the same temperature, to the mixture was added an aqueous saturated ammonium chloride (2 mL + 10 mL). The mixture was extracted with EtOAc (5 mL × 3). The combined organic extract was washed with brine (10 mL). The extract was dried with Na<sub>2</sub>SO<sub>4</sub>. After filtration, the filtrate was concentrated under reduced pressure. The residue was purified by preparative TLC (*n*-hexane/EtOAc = 10/1) to give 2-bromophenyl *p*-tolyl sulfide (8.9 mg, 25 μmol, 64%) as a colorless solid.

According to the procedure for preparing *S*-(3,4-dimethylphenyl) 4-methylbenzenesulfonothioate, 2-bromo-4,5-difluorophenyl 3,5-dimethoxyphenyl sulfide (12.9 mg, 71%) was prepared from *S*-(2-bromo-4,5-difluorophenyl) 4-methylbenzenesulfonothioate (**5c**) and (3,5-dimethoxyphenyl)boronic acid (**16c**).

### Synthesis of *S*-(2-bromophenyl)-*S*-(4-tolyl)sulfilimine (**18a**)

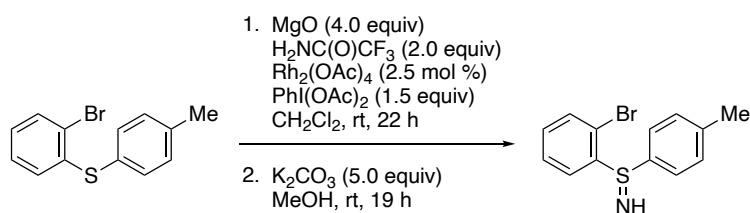

To a mixture of 2-bromophenyl 4-tolyl sulfide (1.14 g, 3.31 mmol), MgO (532 mg, 13.2 mmol, 3.99 equiv), H<sub>2</sub>NC(O)CF<sub>3</sub> (0.748 g, 6.62 mmol, 2.00 equiv), and Rh<sub>2</sub>(OAc)<sub>4</sub> (36.6 mg, 82.8 μmol, 2.50 mol %) in CH<sub>2</sub>Cl<sub>2</sub> (15.0 mL) was added PhI(OAc)<sub>2</sub> (1.60 g, 4.97 mmol, 1.50 equiv) at room temperature. After stirring for 22 h at the same temperature, the mixture was filtered through a pad of Celite and washed with EtOAc (20 mL). The filtrate was concentrated under reduced pressure. The residue was purified by silica-gel column chromatography (CH<sub>2</sub>Cl<sub>2</sub>) to give *N*-((2-bromophenyl)(*p*-tolyl)-λ<sup>4</sup>-sulfaneylidene)-2,2,2-trifluoroacetamide (1.19 g, 3.04 mmol, 92%) as a colorless solid.

To a solution of the residue prepared above in MeOH (6.5 mL) was added K<sub>2</sub>CO<sub>3</sub> (2.10 g, 15.2 mmol, 5.00 equiv) at room temperature. After stirring for 19 h at the same temperature, to the mixture was added water (10 mL). The mixture was extracted with CH<sub>2</sub>Cl<sub>2</sub> (10 mL × 3). The combined organic extract was washed with brine (20 mL) and dried with Na<sub>2</sub>SO<sub>4</sub>. After filtration, the filtrate was concentrated under reduced pressure. The residue was purified by flash column chromatography (silica-gel 50.0 g, CH<sub>2</sub>Cl<sub>2</sub>/MeOH = 5/1) to give (2-bromophenyl)(*p*-tolyl)-λ<sup>4</sup>-sulfanimine (**18a**) (830.9 mg, 2.82 mmol, 93%) as a pale yellow solid.

Synthesis of (2-bromo-5-fluoro-4-methoxyphenyl)(3,5-dimethoxyphenyl)- $\lambda^4$ -sulfanimine (**18b**)

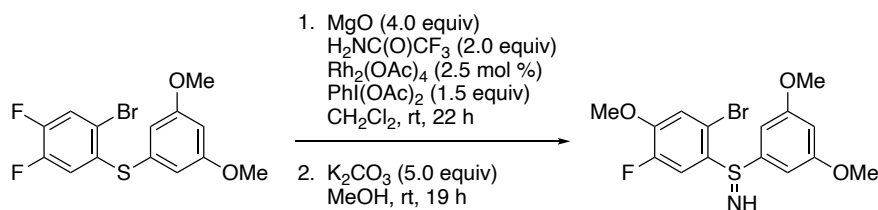

In a 5 mL screw-top V-vial<sup>®</sup> with a solid-top cap (Sigma–Aldrich, Cat. No. Z115118), to a mixture of 2-bromo-4,5-difluorophenyl 3,5-dimethoxyphenyl sulfide (33.7 mg, 93.3  $\mu$ mol), MgO (15.0 mg, 0.372 mmol, 3.99 equiv), H<sub>2</sub>NC(O)CF<sub>3</sub> (21.0 mg, 0.186 mmol, 2.0 equiv), and Rh<sub>2</sub>(OAc)<sub>4</sub> (1.0 mg, 2.3  $\mu$ mol, 2.5 mol %) in CH<sub>2</sub>Cl<sub>2</sub> (0.45 mL) was added PhI(OAc)<sub>2</sub> (45.0 mg, 0.135 mmol, 1.47 equiv) at room temperature. After stirring for 22 h at the same temperature, the mixture was filtered through a pad of Celite and washed with EtOAc (5 mL). The filtrate was concentrated under reduced pressure. The residue was purified by silica-gel column chromatography (CH<sub>2</sub>Cl<sub>2</sub>) to give *N*-((2-bromo-4,5-difluorophenyl)(3,5-dimethoxyphenyl)- $\lambda^4$ -sulfaneylidene)-2,2,2-trifluoroacetamide (23.9 mg, 50.6  $\mu$ mol, 54%) as yellow solid.

To a solution of the residue prepared above in MeOH (0.50 mL) was added K<sub>2</sub>CO<sub>3</sub> (35.0 mg, 0.253 mmol, 5.00 equiv) at room temperature. After stirring for 19 h at the same temperature, to the mixture was added water (10 mL). The mixture was extracted with CH<sub>2</sub>Cl<sub>2</sub> (10 mL  $\times$  3). The combined organic extract was washed with brine (20 mL) and dried with Na<sub>2</sub>SO<sub>4</sub>. After filtration, the filtrate was concentrated under reduced pressure. The residue was purified by preparative TLC (CH<sub>2</sub>Cl<sub>2</sub>/MeOH = 5/1) to give (2-bromo-5-fluoro-4-methoxyphenyl)(3,5-dimethoxyphenyl)- $\lambda^4$ -sulfanimine (**18b**) (15.8 mg, 42.0  $\mu$ mol, 83%) as a yellow solid.

Synthesis of *N*-(2-bromo-5-fluoro-4-methoxyphenyl)-4-((3,5-dimethoxyphenyl)thio)dibenzo[*b,d*]furan-3-amine (**20d**)

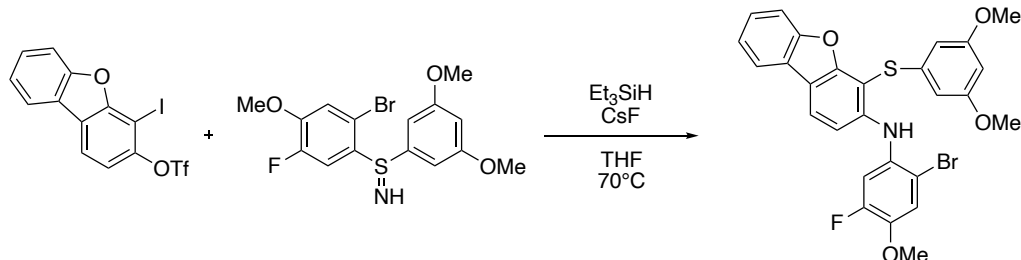

In a 5 mL screw-top V-vial<sup>®</sup> with a solid-top cap (Sigma–Aldrich, Cat. No. Z115118), to a mixture of 4-iododibenzo[*b,d*]furan-3-yl trifluoromethanesulfonate (**19c**) (208 mg, 0.471 mmol, 1.50 equiv) and (2-bromo-5-fluoro-4-methoxyphenyl)(3,5-dimethoxyphenyl)- $\lambda^4$ -sulfanimine (**18b**) (0.122 g, 0.314 mmol, 1.00 equiv) dissolved in THF (3.0 mL) were added triethylsilane (225  $\mu$ L, 1.41 mmol, 4.49 equiv) and cesium fluoride (0.215 g, 1.41 mmol, 4.49 equiv) at room temperature. After stirring for 24 h at 70 °C, the mixture was cooled to room temperature. To the mixture was added 0.1 M phosphate buffer solution (pH 7.2) (2 mL + 10 mL). The mixture was extracted with EtOAc (10 mL  $\times$  3). The combined organic extract was washed with brine (10 mL) and dried with Na<sub>2</sub>SO<sub>4</sub>. After filtration, the filtrate was concentrated under reduced pressure. The residue was purified by preparative TLC (n-hexane/EtOAc = 4/1) to give *N*-(2-bromo-5-fluoro-4-methoxyphenyl)-4-((3,5-dimethoxyphenyl)thio)dibenzo[*b,d*]furan-3-amine (**20d**) (63.4 mg, 114  $\mu$ mol, 36%) as a pale yellow oil.

A typical procedure for the synthesis of *N*-arylphenothiazines from *o*-arylthio-*N*-arylanilines

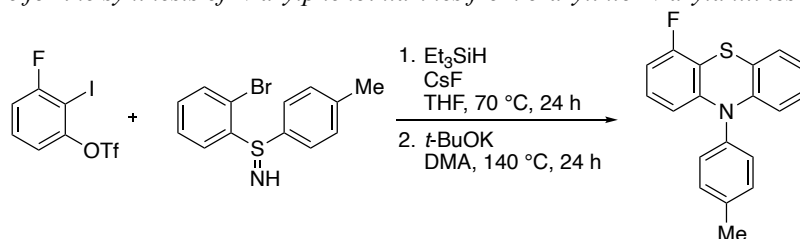

In a 5 mL screw-top V-vial<sup>®</sup> with a solid-top cap (Sigma–Aldrich, Cat. No. Z115118), to a mixture of 3-fluoro-2-iodophenyl trifluoromethanesulfonate (**19a**) (111 mg, 0.300 mmol, 1.50 equiv) and (2-bromophenyl)(*p*-tolyl)- $\lambda^4$ -sulfanimine (**18a**) (58.8 mg, 0.200 mmol) dissolved in THF (2.0 mL) were added triethylsilane (91.7  $\mu\text{L}$ , 0.900 mmol, 4.50 equiv) and cesium fluoride (137 mg, 0.900 mmol, 4.50 equiv) at room temperature. After stirring for 24 h at 70 °C, the mixture was cooled to room temperature. To the mixture was added 0.1 M phosphate buffer solution (pH 7.2) (2 mL + 10 mL). The mixture was extracted with EtOAc (10 mL  $\times$  3). The combined organic extract was washed with brine (10 mL) and dried with  $\text{Na}_2\text{SO}_4$ . After filtration, the filtrate was concentrated under reduced pressure. The residue was purified by preparative TLC (*n*-hexane/EtOAc =7/1) to give *N*-(2-bromophenyl)-3-fluoro-2-(*p*-tolylthio)aniline (**20a**) (43.5 mg, 0.112 mmol, 56%) as a colorless solid.

To a solution of the residue prepared above in *N,N*-dimethylacetamide (DMA) (1.5 mL) was added *t*-BuOK (62.8 mg, 0.560 mmol, 5.0 equiv) at room temperature. After stirring for 24 h at 140 °C, to the mixture was added water (10 mL). The mixture was extracted with  $\text{CH}_2\text{Cl}_2$  (10 mL  $\times$  3), and the combined organic extract was washed with brine (20 mL) and dried with  $\text{Na}_2\text{SO}_4$ . After filtration, the filtrate was concentrated under reduced pressure. The residue was purified by preparative TLC (*n*-hexane/EtOAc =5/1) to give 4-fluoro-10-(*p*-tolyl)-10*H*-phenothiazine (**21a**) (21.0 mg, 68.4  $\mu\text{mol}$ , 61%) as a colorless solid.

According to the procedure for preparing 4-fluoro-10-(*p*-tolyl)-10*H*-phenothiazine (**21a**), 4-(benzyloxy)-10-(*p*-tolyl)-10*H*-phenothiazine (**21b**) (25.1 mg, 73%) and 5-(*p*-tolyl)-5*H*-benzofuro[3,2-*c*]phenothiazine (**21c**) (56.6 mg, 42%) were prepared from the corresponding sulfides **20**.

### Characterization Data of New Compounds

*O*-Ethyl *S*-(4-methoxyphenyl) carbonodithioate (**2i**),<sup>S10</sup> *O*-ethyl *S*-(3-methoxyphenyl) carbonodithioate (**2i'**),<sup>S11</sup> *S*-(2-chlorophenyl) *O*-ethyl carbonodithioate (**7b**),<sup>S10</sup> *S*-phenyl 4-methylbenzenesulfonothioate (**3b**),<sup>S12</sup> *S*-(benzo[*d*][1,3]dioxol-5-yl) 4-methylbenzenesulfonothioate (**3e**),<sup>S13</sup> *S*-(3-methoxyphenyl) 4-methylbenzenesulfonothioate (**3f**),<sup>S14</sup> *S*-(4-methoxyphenyl) 4-methylbenzenesulfonothioate (**3i**),<sup>S12</sup> *S*-(2-bromophenyl) 4-methylbenzenesulfonothioate (**5b**),<sup>S14</sup> *S*-(2-chlorophenyl) 4-methylbenzenesulfonothioate (**9b**),<sup>S12</sup> 3,4-dimethylphenyl 4-methoxyphenyl sulfide (**15a**),<sup>S15</sup> 2-bromophenyl *p*-tolyl sulfide,<sup>S16</sup> and *S*-(2-bromophenyl)-*S*-(4-tolyl)sulfilimine (**18a**)<sup>S15</sup> were identical with the spectral data reported in the literature.

### Characterization Data of a New Aryne Precursor

Methyl 1-(3-methoxy-5-(((trifluoromethyl)sulfonyl)oxy)-4-(trimethylsilyl)phenyl)-1*H*-1,2,3-triazole-4-carboxylate (**1j**)

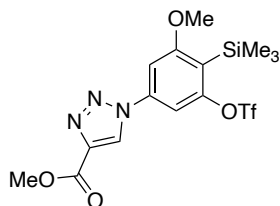

Yield: 98% (15.8 mg, 1.78 mmol); Colorless solid; Mp 112–115 °C; TLC *R*<sub>f</sub> 0.43 (*n*-hexane/EtOAc = 1/1); <sup>1</sup>H NMR (CDCl<sub>3</sub>, 400 MHz): δ 8.51 (s, 1H), 7.38 (d, 1H, *J* = 1.7 Hz), 7.26–7.25 (m, 1H), 4.01 (s, 3H), 3.94 (s, 3H), 0.39 (s, 9H); <sup>13</sup>C{<sup>1</sup>H} NMR (CDCl<sub>3</sub>, 101 MHz): δ 166.5, 160.7, 154.6, 140.9, 138.6, 125.5, 122.7, 118.5 (q, *J* = 321 Hz), 104.8, 102.2, 56.2, 52.5, 0.6; <sup>19</sup>F{<sup>1</sup>H} NMR (CDCl<sub>3</sub>, 377 MHz): δ -72.6 (s); IR (NaCl, cm<sup>-1</sup>) 847, 940, 1049, 1140, 1216, 1425, 1605, 1736; HRMS (ESI) *m/z*: [M+H]<sup>+</sup> Calcd for C<sub>15</sub>H<sub>19</sub>F<sub>3</sub>N<sub>3</sub>O<sub>6</sub>SSi<sup>+</sup> 454.0710; Found 454.0710.

### Characterization Data of New Xanthates

*S*-(3,4-Dimethylphenyl) *O*-ethyl carbonodithioate (**2a**)

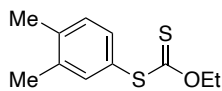

Yield: 70% (15.8 mg, 69.9 μmol); Pale yellow oil; TLC *R*<sub>f</sub> 0.21 (*n*-hexane); <sup>1</sup>H NMR (CDCl<sub>3</sub>, 400 MHz): δ 7.27–7.26 (m, 1H), 7.25–7.23 (m, 1H), 7.19 (d, 1H, *J* = 7.8 Hz), 4.62 (q, 2H, *J* = 7.1 Hz), 2.30 (s, 3H), 2.29 (s, 3H), 1.35 (t, 3H, *J* = 7.1 Hz); <sup>13</sup>C{<sup>1</sup>H} NMR (CDCl<sub>3</sub>, 101 MHz): δ 214.3, 139.0, 137.7, 135.9, 132.5, 130.5, 126.9, 70.2, 19.7, 19.6, 13.6; IR (NaCl, cm<sup>-1</sup>) 813, 851, 884, 996, 1042, 1110, 1148, 1225, 1366, 1385, 1447, 1487, 1597, 2980; HRMS (ESI) *m/z*: [M+Na]<sup>+</sup> Calcd for C<sub>11</sub>H<sub>14</sub>NaOS<sub>2</sub><sup>+</sup> 249.0384; Found 249.0385.

Methyl 1-(3-((ethoxycarbonothioyl)thio)-5-methoxyphenyl)-1*H*-1,2,3-triazole-4-carboxylate (**2j**)

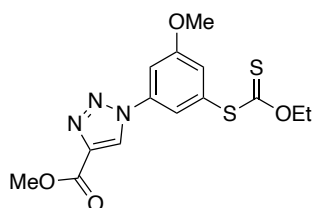

Yield: 33% (22.4 mg involving a small amount of impurity, <64 μmol; <sup>1</sup>H NMR yield); To obtain an authentic sample of **2j**, further purification was carried out by recycling preparative HPLC system (SHIMADZU) equipped with a refractive index detector and a YMC-GPC T2000 (600 mm × 20 φ) column (YMC Co., Ltd.) using CHCl<sub>3</sub> as an eluent, followed by recrystallization from EtOH/*n*-hexane (v/v = 3/1). Colorless solid; Mp 121–124 °C; TLC *R*<sub>f</sub> 0.40 (*n*-hexane/EtOAc = 1/1); <sup>1</sup>H NMR (CDCl<sub>3</sub>, 400 MHz): δ 8.52 (s, 1H), 7.48–7.47 (m, 1H), 7.46–7.45 (m, 1H), 7.41 (dd, 1H, *J* = 2.3, 1.4 Hz), 4.64 (q, 2H, *J* = 7.1 Hz), 4.00 (s, 3H), 3.92 (s, 3H), 1.37 (t, 3H, *J* = 7.1 Hz); <sup>13</sup>C{<sup>1</sup>H} NMR (CDCl<sub>3</sub>, 101 MHz): δ 211.0, 160.9, 160.8, 140.7, 137.5, 133.3, 125.5, 121.4, 118.8, 108.2, 70.8, 56.1, 52.4, 13.6; IR (NaCl, cm<sup>-1</sup>) 1036, 1149, 1232, 1368, 1429, 1554, 1603, 1739; HRMS (ESI) *m/z*: [M+H]<sup>+</sup> Calcd for C<sub>14</sub>H<sub>16</sub>N<sub>3</sub>O<sub>4</sub>S<sub>2</sub><sup>+</sup> 354.0577; Found 354.0578.

*S*-(2-Bromo-4,5-dimethylphenyl) *O*-ethyl carbonodithioate (**6a**)

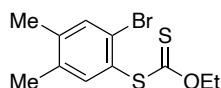

Yield: 69% (21.0 mg, 69.1  $\mu\text{mol}$ ); Colorless solid; Mp 64–67 °C; TLC  $R_f$  0.64 (*n*-hexane/EtOAc = 4/1);  $^1\text{H}$  NMR ( $\text{CDCl}_3$ , 400 MHz):  $\delta$  7.48 (s, 1H), 7.35 (s, 1H), 4.61 (q, 2H,  $J = 7.1$  Hz), 2.27 (s, 3H), 2.23 (s, 3H), 1.34 (t, 3H,  $J = 7.1$  Hz);  $^{13}\text{C}\{^1\text{H}\}$  NMR ( $\text{CDCl}_3$ , 101 MHz):  $\delta$  211.4, 141.3, 137.8, 136.9, 134.2, 127.9, 127.0, 70.3, 19.5, 19.1, 13.6; IR (NaCl,  $\text{cm}^{-1}$ ) 917, 999, 1043, 1110, 1228, 1365, 1445, 2979; HRMS (ESI)  $m/z$ :  $[\text{M}+\text{Na}]^+$  Calcd for  $\text{C}_{11}\text{H}_{13}\text{BrNaOS}_2^+$  326.9489; Found 326.9489.

*S*-(2-Chloro-4,5-dimethylphenyl) *O*-ethyl carbonodithioate (**7a**)

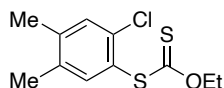

Yield: 87% (22.6 mg, 86.9  $\mu\text{mol}$ ); Colorless solid; Mp 111–114 °C; TLC  $R_f$  0.43 (*n*-hexane/EtOAc = 4/1);  $^1\text{H}$  NMR ( $\text{CDCl}_3$ , 400 MHz):  $\delta$  7.33 (s, 1H), 7.30 (s, 1H), 4.61 (q, 2H,  $J = 7.1$  Hz), 2.28 (s, 3H), 2.24 (s, 3H), 1.34 (t, 3H,  $J = 7.1$  Hz);  $^{13}\text{C}\{^1\text{H}\}$  NMR ( $\text{CDCl}_3$ , 101 MHz):  $\delta$  211.6, 141.3, 137.8, 136.3, 136.2, 131.0, 125.8, 70.4, 19.6, 19.1, 13.6; IR (NaCl,  $\text{cm}^{-1}$ ) 999, 1045, 1110, 1228, 1447, 1455, 1464, 1471, 2922; HRMS (ESI)  $m/z$ :  $[\text{M}+\text{Na}]^+$  Calcd for  $\text{C}_{11}\text{H}_{13}\text{ClNaOS}_2^+$  282.9994; Found 282.9990.

*O*-Ethyl *S*-(2-iodo-4,5-dimethylphenyl) carbonodithioate (**8a**)

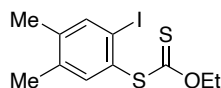

Yield: 70% (15.8 mg, 69.9  $\mu\text{mol}$ ); Pale yellow oil; TLC  $R_f$  0.66 (*n*-hexane/EtOAc = 4/1);  $^1\text{H}$  NMR ( $\text{CDCl}_3$ , 400 MHz):  $\delta$  7.75 (s, 1H), 7.40 (s, 1H), 4.62 (q, 2H,  $J = 7.1$  Hz), 2.25 (s, 3H), 2.22 (s, 3H), 1.35 (t, 3H,  $J = 7.1$  Hz);  $^{13}\text{C}\{^1\text{H}\}$  NMR ( $\text{CDCl}_3$ , 101 MHz):  $\delta$  211.7, 141.1, 140.9, 138.0, 137.2, 132.4, 104.4, 70.4, 19.3, 19.2, 13.7; IR (NaCl,  $\text{cm}^{-1}$ ) 904, 1040, 1110, 1149, 1226, 1339, 1366, 1442, 1583, 1739, 2925; HRMS (ESI)  $m/z$ :  $[\text{M}+\text{Na}]^+$  Calcd for  $\text{C}_{11}\text{H}_{13}\text{INaOS}_2^+$  374.9350; Found 374.9345.

*O*-Ethyl *S*-(2-iodophenyl) carbonodithioate (**8b**)

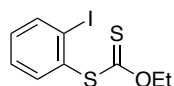

Yield: 80% (25.9 mg, 80.0  $\mu\text{mol}$ ); Brown oil; TLC  $R_f$  0.63 (*n*-hexane/EtOAc = 4/1);  $^1\text{H}$  NMR ( $\text{CDCl}_3$ , 400 MHz):  $\delta$  8.00 (dd, 1H,  $J = 7.7, 1.3$  Hz), 7.65 (dd, 1H,  $J = 7.7, 1.6$  Hz), 7.41 (ddd, 1H,  $J = 7.7, 7.7, 1.3$  Hz), 7.12 (ddd, 1H,  $J = 7.7, 7.7, 1.6$  Hz), 4.61 (q, 2H,  $J = 7.1$  Hz), 1.33 (t, 3H,  $J = 7.1$  Hz);  $^{13}\text{C}\{^1\text{H}\}$  NMR ( $\text{CDCl}_3$ , 101 MHz):  $\delta$  210.7, 140.2, 136.4, 135.7, 131.4, 129.1, 108.2, 70.5, 13.6; IR (NaCl,  $\text{cm}^{-1}$ ) 849, 1010, 1043, 1109, 1149, 1226, 1365, 1444, 2978; HRMS (ESI)  $m/z$ :  $[\text{M}+\text{Na}]^+$  Calcd for  $\text{C}_9\text{H}_9\text{INaOS}_2^+$  346.9037; Found 346.9036.

*O*-Ethyl *S*-(6-iodobenzo[*d*][1,3]dioxol-5-yl) carbonodithioate (**8e**)

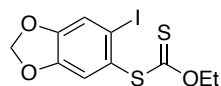

Yield: 73% (26.7 mg, 72.5  $\mu\text{mol}$ ); Pale yellow oil; TLC  $R_f$  0.48 (*n*-hexane/EtOAc = 4/1);  $^1\text{H}$  NMR ( $\text{CDCl}_3$ , 400 MHz):  $\delta$  7.34 (s, 1H), 7.11 (s, 1H), 6.06 (s, 2H), 4.63 (q, 2H,  $J = 7.1$  Hz), 1.37 (t, 3H,  $J = 7.1$  Hz);  $^{13}\text{C}\{^1\text{H}\}$  NMR ( $\text{CDCl}_3$ , 101 MHz):  $\delta$  211.6, 150.1, 148.9, 127.8, 119.4, 115.6, 102.4, 98.3, 70.6, 13.7; IR (NaCl,  $\text{cm}^{-1}$ ) 861, 933, 1000, 1036, 1110, 1143, 1232, 1319, 1365, 1464, 1470, 1501, 2899; HRMS (ESI)  $m/z$ :  $[\text{M}+\text{H}]^+$  Calcd for  $\text{C}_{10}\text{H}_{10}\text{IO}_3\text{S}_2^+$  368.9111; Found 368.9114.

*O*-Ethyl *S*-(2-iodo-3-methoxyphenyl) carbonodithioate (**8f**)

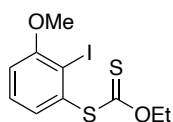

Yield: 68% (24.1 mg, 68.1  $\mu\text{mol}$ ); Pale yellow solid; Mp 66–69 °C; TLC  $R_f$  0.69 (*n*-hexane/EtOAc = 4/1);  $^1\text{H}$  NMR ( $\text{CDCl}_3$ , 400 MHz):  $\delta$  7.36 (dd, 1H,  $J = 8.1, 8.1$  Hz), 7.29 (dd, 1H,  $J = 8.1, 1.4$  Hz), 6.86 (dd, 1H,  $J = 8.1, 1.4$  Hz), 4.61 (q, 2H,  $J = 7.1$  Hz), 3.92 (s, 3H), 1.32 (t, 3H,  $J = 7.1$  Hz);  $^{13}\text{C}\{^1\text{H}\}$  NMR ( $\text{CDCl}_3$ , 101 MHz):  $\delta$  210.8, 159.4, 137.2, 129.6, 128.5, 111.9, 100.4, 70.4, 56.8, 13.6; IR (NaCl,  $\text{cm}^{-1}$ ) 1013, 1035, 1112, 1149, 1225, 1262, 1408, 1428, 1455, 1564; HRMS (ESI)  $m/z$ :  $[\text{M}+\text{H}]^+$  Calcd for  $\text{C}_{10}\text{H}_{12}\text{IO}_2\text{S}_2^+$  354.9318; Found 354.9318.

*O*-Ethyl *S*-(2-iodo-3-((4-methoxyphenyl)thio)phenyl) carbonodithioate (**8g**)

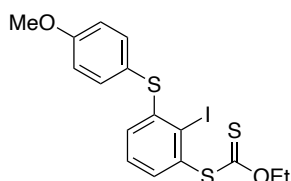

Yield: 91% (41.9 mg, 90.6  $\mu\text{mol}$ ); Pale yellow oil; TLC  $R_f$  0.38 (*n*-hexane/EtOAc = 4/1);  $^1\text{H}$  NMR ( $\text{CDCl}_3$ , 400 MHz):  $\delta$  7.50–7.48 (AA'BB', 2H), 7.37 (dd, 1H,  $J = 7.5$  Hz, 1.5 Hz), 7.16 (dd, 1H,  $J = 7.8, 7.8$  Hz), 6.99–6.97 (AA'BB', 2H), 6.62 (dd, 1H,  $J = 8.0, 1.5$  Hz), 4.62 (q, 2H,  $J = 7.1$  Hz), 3.86 (s, 3H), 1.34 (t, 3H,  $J = 7.1$  Hz);  $^{13}\text{C}\{^1\text{H}\}$  NMR ( $\text{CDCl}_3$ , 101 MHz):  $\delta$  210.5, 160.8, 147.8, 137.0, 132.2, 128.8, 127.5, 123.4, 115.6, 115.0, 109.1, 70.4, 55.4, 13.6; IR (NaCl,  $\text{cm}^{-1}$ ) 830, 1006, 1039, 1107, 1172, 1231, 1251, 1372, 1424, 1494, 1590; HRMS (ESI)  $m/z$ :  $[\text{M}+\text{H}]^+$  Calcd for  $\text{C}_{16}\text{H}_{16}\text{IO}_2\text{S}_3^+$  462.9352; Found 462.9358.

### Characterization Data of New Thiosulfonates

*S*-(3,4-Dimethylphenyl) 4-methylbenzenesulfonylthioate (**3a**)

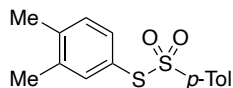

Yield: 87% (12.7 mg, 43.5  $\mu\text{mol}$ ); Colorless solid; Mp 75–78 °C; TLC  $R_f$  0.41 (*n*-hexane/EtOAc = 4/1);  $^1\text{H}$  NMR ( $\text{CDCl}_3$ , 400 MHz):  $\delta$  7.48–7.46 (AA'BB', 2H), 7.23–7.21 (AA'BB', 2H), 7.13–7.11 (br, 1H), 7.08 (d, 1H,  $J = 7.8$  Hz), 7.04 (dd, 1H,  $J = 7.8, 1.7$  Hz), 2.43 (s, 3H), 2.27 (s, 3H), 2.19 (s, 3H);  $^{13}\text{C}\{^1\text{H}\}$  NMR ( $\text{CDCl}_3$ , 101 MHz):  $\delta$  144.5, 140.7, 140.4, 138.0, 137.5, 133.9, 130.6, 129.3, 127.7, 124.5, 21.6, 19.8, 19.6; IR (NaCl,  $\text{cm}^{-1}$ ) 813, 1079, 1143, 1328, 1455, 1488, 1594, 2920; HRMS (ESI)  $m/z$ :  $[\text{M}+\text{Na}]^+$  Calcd for  $\text{C}_{15}\text{H}_{16}\text{NaO}_2\text{S}_2^+$  315.0489; Found 315.0491.

*S*-(3,4-Difluorophenyl) 4-methylbenzenesulfonylthioate (**3c**)

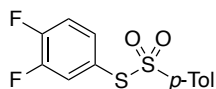

Yield: 51% (7.7 mg, 26  $\mu\text{mol}$ ); Colorless solid; Mp 48–51 °C; TLC  $R_f$  0.40 (*n*-hexane/EtOAc = 4/1);  $^1\text{H}$  NMR ( $\text{CDCl}_3$ , 400 MHz):  $\delta$  7.50–7.48 (AA'BB', 2H), 7.27–7.25 (m, 2H), 7.23–7.18 (m, 1H), 7.16–7.13 (m, 2H), 2.44 (s, 3H);  $^{13}\text{C}\{^1\text{H}\}$  NMR ( $\text{CDCl}_3$ , 101 MHz):  $\delta$  152.7 (dd,  $J = 256, 11.9$  Hz), 150.1 (dd,  $J = 254, 13.0$  Hz), 145.3, 139.9, 133.4 (dd,  $J = 7.0, 3.6$  Hz), 129.6, 127.6, 125.5 (dd,  $J = 17.4, 1.7$  Hz), 124.2 (dd,  $J = 6.6, 4.4$  Hz), 118.2 (d,  $J = 17.9$  Hz), 21.7;  $^{19}\text{F}\{^1\text{H}\}$  NMR ( $\text{CDCl}_3$ , 377 MHz):  $\delta$  -131.6 (d, 1F,  $J = 21.2$  Hz), -134.4 (d, 1F,  $J = 21.2$  Hz); IR (NaCl,  $\text{cm}^{-1}$ ) 814, 1079, 1118, 1145, 1275, 1332, 1407, 1502, 1603; HRMS (ESI)  $m/z$ :  $[\text{M}+\text{Na}]^+$  Calcd for  $\text{C}_{13}\text{H}_{10}\text{F}_2\text{NaO}_2\text{S}_2^+$  322.9982; Found 322.9982.

*S*-(3,4-Dimethoxyphenyl) 4-methylbenzenesulfonylthioate (**3d**)

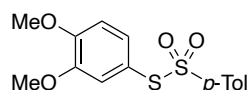

Yield: 80% (12.7 mg, 43.5  $\mu\text{mol}$ ); Colorless solid; Mp 101–104 °C; TLC  $R_f$  0.32 (*n*-hexane/EtOAc = 2/1);  $^1\text{H}$  NMR ( $\text{CDCl}_3$ , 400 MHz):  $\delta$  7.49–7.47 (AA'BB', 2H), 7.24–7.22 (AA'BB', 2H), 6.98 (dd, 1H,  $J$  = 8.4, 2.1 Hz), 6.81 (d, 1H,  $J$  = 8.4 Hz), 6.74 (d, 1H,  $J$  = 2.1 Hz), 3.91 (s, 3H), 3.72 (s, 3H), 2.42 (s, 3H);  $^{13}\text{C}\{^1\text{H}\}$  NMR ( $\text{CDCl}_3$ , 101 MHz):  $\delta$  151.8, 149.0, 144.6, 140.2, 130.4, 129.4, 127.8, 118.8, 118.7, 111.3, 56.0, 55.9, 21.7; IR (NaCl,  $\text{cm}^{-1}$ ) 1022, 1139, 1233, 1258, 1324, 1505, 1583; HRMS (ESI)  $m/z$ :  $[\text{M}+\text{Na}]^+$  Calcd for  $\text{C}_{15}\text{H}_{16}\text{NaO}_4\text{S}_2^+$  347.0388; Found 347.0386.

*S*-(3-((4-Methoxyphenyl)thio)phenyl) 4-methylbenzenesulfonylthioate (**3g**)

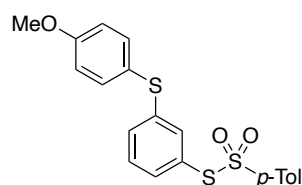

Yield: 60% (12.1 mg, 30.1  $\mu\text{mol}$ ); Brown oil; TLC  $R_f$  0.24 (*n*-hexane/EtOAc = 4/1);  $^1\text{H}$  NMR ( $\text{CDCl}_3$ , 400 MHz):  $\delta$  7.44–7.42 (AA'BB', 2H), 7.37–7.33 (AA'BB', 2H), 7.23–7.21 (AA'BB', 2H), 7.21–7.14 (m, 3H), 6.99–6.98 (m, 1H), 6.92–6.89 (AA'BB', 2H), 3.84 (s, 3H), 2.45 (s, 3H);  $^{13}\text{C}\{^1\text{H}\}$  NMR ( $\text{CDCl}_3$ , 101 MHz):  $\delta$  160.3, 144.8, 141.0, 140.1, 136.0, 134.6, 133.4, 130.0, 129.7, 129.4, 128.8, 127.7, 122.3, 115.2, 55.4, 21.8; IR (NaCl,  $\text{cm}^{-1}$ ) 830, 1030, 1079, 1145, 1173, 1246, 1291, 1329, 1395, 1458, 1491, 1570, 1593, 2925; HRMS (ESI)  $m/z$ :  $[\text{M}+\text{Na}]^+$  Calcd for  $\text{C}_{20}\text{H}_{18}\text{NaO}_3\text{S}_3^+$  425.0316; Found 425.0313.

Methyl 1-(3-methoxy-5-(tosylthio)phenyl)-1*H*-1,2,3-triazole-4-carboxylate (**3j**)

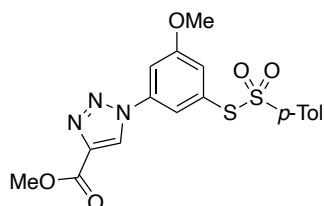

Yield: 52% (4.7 mg, 11  $\mu\text{mol}$ ); Colorless solid; Mp 171–176 °C; TLC  $R_f$  0.40 (*n*-hexane/EtOAc = 4/1);  $^1\text{H}$  NMR ( $\text{CDCl}_3$ , 400 MHz):  $\delta$  8.34 (s, 1H), 7.56–7.54 (AA'BB', 2H), 7.52 (dd, 1H,  $J$  = 1.9, 1.9 Hz), 7.27–7.25 (m, 2H), 7.14 (dd, 1H,  $J$  = 1.9, 1.9 Hz), 7.06 (dd, 1H,  $J$  = 1.9, 1.9 Hz), 4.00 (s, 3H), 3.86 (s, 3H), 2.43 (s, 3H);  $^{13}\text{C}\{^1\text{H}\}$  NMR ( $\text{CDCl}_3$ , 101 MHz):  $\delta$  160.9, 160.7, 145.6, 140.8, 139.9, 137.4, 131.1, 129.7, 127.9, 125.5, 122.3, 119.5, 109.9, 56.1, 52.5, 21.7; IR (NaCl,  $\text{cm}^{-1}$ ) 811, 1036, 1143, 1232, 1331, 1429, 1457, 1557, 1600, 1743; HRMS (ESI)  $m/z$ :  $[\text{M}+\text{H}]^+$  Calcd for  $\text{C}_{18}\text{H}_{18}\text{N}_3\text{O}_5\text{S}_2^+$  420.0682; Found 420.0682.

*S*-(2-Bromo-4,5-dimethylphenyl) 4-methylbenzenesulfonylthioate (**5a**)

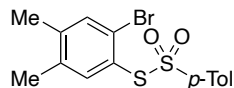

Yield: 80% (14.8 mg, 40.0  $\mu\text{mol}$ ); Colorless solid; Mp 104–107 °C; TLC  $R_f$  0.43 (*n*-hexane/EtOAc = 4/1);  $^1\text{H}$  NMR ( $\text{CDCl}_3$ , 400 MHz):  $\delta$  7.50–7.48 (AA'BB', 2H), 7.42 (s, 1H), 7.34 (s, 1H), 7.24–7.22 (AA'BB', 2H), 2.43 (s, 3H), 2.26 (s, 3H), 2.21 (s, 3H);  $^{13}\text{C}\{^1\text{H}\}$  NMR ( $\text{CDCl}_3$ , 101 MHz):  $\delta$  144.8, 142.8, 140.9, 140.2, 137.3, 134.3, 129.5, 127.8, 127.7, 125.8, 21.7, 19.6, 19.1; IR (NaCl,  $\text{cm}^{-1}$ ) 811, 1079, 1143, 1331, 1457, 1517, 1541; HRMS (ESI)  $m/z$ :  $[\text{M}+\text{Na}]^+$  Calcd for  $\text{C}_{15}\text{H}_{15}\text{BrNaO}_2\text{S}_2^+$  392.9595; Found 392.9593.

S-(2-Bromo-4,5-difluorophenyl) 4-methylbenzenesulfonothioate (**5c**)

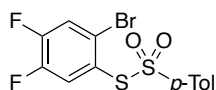

Yield: 57% (10.9 mg, 28.7  $\mu\text{mol}$ ); Colorless solid; Mp 126–129 °C; TLC  $R_f$  0.39 (*n*-hexane/EtOAc = 4/1);  $^1\text{H}$  NMR ( $\text{CDCl}_3$ , 400 MHz):  $\delta$  7.58 (dd, 1H,  $J$  = 9.6, 8.0 Hz), 7.52–7.50 (AA'BB', 2H), 7.42 (dd, 1H,  $J$  = 9.4, 7.4 Hz), 7.28–7.26 (m, 2H), 2.4 (s, 3H);  $^{13}\text{C}\{^1\text{H}\}$  NMR ( $\text{CDCl}_3$ , 101 MHz):  $\delta$  152.1 (dd,  $J$  = 261, 13.3 Hz), 149.3 (dd,  $J$  = 255, 12.9 Hz), 145.6, 140.4, 129.8, 127.6, 127.4 (dd,  $J$  = 17.1, 1.4 Hz), 126.0–125.8 (m), 122.3 (d,  $J$  = 20.3 Hz), 21.7;  $^{19}\text{F}\{^1\text{H}\}$  NMR ( $\text{CDCl}_3$ , 377 MHz):  $\delta$  -128.4 (d, 1F,  $J$  = 20.8 Hz), -135.2 (d, 1F,  $J$  = 20.8 Hz); IR (NaCl,  $\text{cm}^{-1}$ ) 813, 884, 1079, 1146, 1182, 1281, 1334, 1362, 1478, 1593; HRMS (ESI)  $m/z$ :  $[\text{M}+\text{Na}]^+$  Calcd for  $\text{C}_{13}\text{H}_9\text{BrF}_2\text{NaO}_2\text{S}_2^+$  400.9088; Found 400.9086.

S-(2-Bromo-3-methoxyphenyl) 4-methylbenzenesulfonothioate (**5f**)

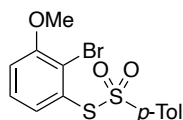

Yield: 84% (15.4 mg, 41.4  $\mu\text{mol}$ ); Off-white solid; Mp 71–74 °C; TLC  $R_f$  0.38 (*n*-hexane/EtOAc = 4/1);  $^1\text{H}$  NMR ( $\text{CDCl}_3$ , 400 MHz):  $\delta$  7.51–7.51 (AA'BB', 2H), 7.35–7.30 (m, 2H), 7.23–7.21 (AA'BB', 2H), 6.99 (dd, 1H,  $J$  = 7.0, 2.7 Hz), 3.89 (s, 3H), 2.42 (s, 3H);  $^{13}\text{C}\{^1\text{H}\}$  NMR ( $\text{CDCl}_3$ , 101 MHz):  $\delta$  156.9, 145.0, 140.9, 130.9, 130.8, 129.6, 128.4, 127.5, 120.5, 114.5, 56.7, 21.7; IR (NaCl,  $\text{cm}^{-1}$ ) 813, 1045, 1079, 1143, 1268, 1331, 1414, 1432, 1461, 1567, 2939; HRMS (ESI)  $m/z$ :  $[\text{M}+\text{Na}]^+$  Calcd for  $\text{C}_{14}\text{H}_{13}\text{BrNaO}_3\text{S}_2^+$  394.9387; Found 394.9383.

S-(2-Chloro-4,5-dimethylphenyl) 4-methylbenzenesulfonothioate (**9a**)

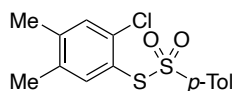

Yield: 74% (12.3 mg, 37.6  $\mu\text{mol}$ ); Colorless solid; Mp 111–114 °C; TLC  $R_f$  0.43 (*n*-hexane/EtOAc = 4/1);  $^1\text{H}$  NMR ( $\text{CDCl}_3$ , 400 MHz):  $\delta$  7.51–7.49 (AA'BB', 2H), 7.38 (s, 1H), 7.24–7.22 (AA'BB', 2H), 7.16 (s, 1H), 2.43 (s, 3H), 2.26 (s, 3H), 2.22 (s, 3H);  $^{13}\text{C}\{^1\text{H}\}$  NMR ( $\text{CDCl}_3$ , 101 MHz):  $\delta$  144.8, 142.8, 141.0, 140.2, 137.1, 136.6, 131.0, 129.5, 127.6, 123.4, 21.7, 19.7, 19.0; IR (NaCl,  $\text{cm}^{-1}$ ) 813, 1079, 1145, 1304, 1331, 1447, 1464, 1593, 2923; HRMS (ESI)  $m/z$ :  $[\text{M}+\text{Na}]^+$  Calcd for  $\text{C}_{15}\text{H}_{15}\text{ClNaO}_2\text{S}_2^+$  349.0100; Found 349.0093.

S-(2-Iodo-4,5-dimethylphenyl) 4-methylbenzenesulfonothioate (**10a**)

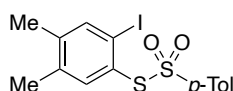

Yield: 76% (7.9 mg, 19  $\mu\text{mol}$ ); Colorless solid; Mp 94–97 °C; TLC  $R_f$  0.39 (*n*-hexane/EtOAc = 4/1);  $^1\text{H}$  NMR ( $\text{CDCl}_3$ , 400 MHz):  $\delta$  7.61 (s, 1H), 7.48–7.46 (m, 3H), 7.25–7.23 (AA'BB', 2H), 2.44 (s, 3H), 2.24 (s, 3H), 2.21 (s, 3H);  $^{13}\text{C}\{^1\text{H}\}$  NMR ( $\text{CDCl}_3$ , 101 MHz):  $\delta$  145.0, 142.6, 141.0, 140.8, 139.3, 138.4, 130.2, 129.7, 127.8, 104.9, 21.8, 19.4, 19.3; IR (NaCl,  $\text{cm}^{-1}$ ) 811, 904, 1079, 1143, 1329, 1447, 1451, 1594, 2919; HRMS (ESI)  $m/z$ :  $[\text{M}+\text{Na}]^+$  Calcd for  $\text{C}_{15}\text{H}_{15}\text{INaO}_2\text{S}_2^+$  440.9456; Found 440.9454.

S-(2-Iodophenyl) 4-methylbenzenesulfonothioate (**10b**)

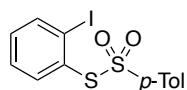

Yield: 98% (19.5 mg, 50.0  $\mu\text{mol}$ ); Pale yellow solid; Mp 109–112 °C; TLC  $R_f$  0.37 (*n*-hexane/EtOAc = 4/1);  $^1\text{H}$  NMR ( $\text{CDCl}_3$ , 400 MHz):  $\delta$  7.85 (dd, 1H,  $J$  = 7.8, 1.6 Hz), 7.78 (dd, 1H,  $J$  = 7.8, 1.6 Hz), 7.45–7.40 (m, 3H), 7.24–7.22 (AA'BB', 2H), 7.12 (ddd, 1H,  $J$  = 7.8, 7.8, 1.6 Hz), 2.44 (s, 3H);  $^{13}\text{C}\{^1\text{H}\}$  NMR ( $\text{CDCl}_3$ , 101 MHz):  $\delta$  145.2, 140.7, 140.3, 138.4, 133.7, 132.4, 129.7, 129.3, 127.7, 108.7, 21.8; IR (NaCl,  $\text{cm}^{-1}$ ) 811, 1013, 1079, 1143, 1252, 1331, 1442, 1565, 1594, 2923, 3058; HRMS (ESI)  $m/z$ :  $[\text{M}+\text{Na}]^+$  Calcd for  $\text{C}_{13}\text{H}_{11}\text{INaO}_2\text{S}_2^+$  412.9143; Found 412.9142.

*S*-(2-Iodo-4,5-dimethoxyphenyl) 4-methylbenzenesulfonylthioate (**10d**)

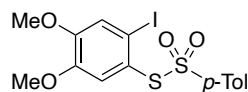

Yield: 75% (18.5 mg, 41.1  $\mu\text{mol}$ ); Colorless solid; Mp 134–137 °C; TLC  $R_f$  0.39 (*n*-hexane/EtOAc = 4/1);  $^1\text{H}$  NMR ( $\text{CDCl}_3$ , 400 MHz):  $\delta$  7.50–7.48 (AA'BB', 2H), 7.26–7.23 (m, 2H), 7.22 (s, 1H), 7.14 (s, 1H), 3.89 (s, 3H), 3.81 (s, 3H), 2.44 (s, 3H);  $^{13}\text{C}\{^1\text{H}\}$  NMR ( $\text{CDCl}_3$ , 101 MHz):  $\delta$  151.7, 149.5, 145.0, 140.5, 129.7, 127.8, 124.6, 121.9, 119.8, 98.4, 56.3, 56.1, 21.7; IR (NaCl,  $\text{cm}^{-1}$ ) 859, 1020, 1077, 1142, 1211, 1253, 1325, 1437, 1461, 1494, 1577; HRMS (ESI)  $m/z$ :  $[\text{M}+\text{NH}_4]^+$  Calcd for  $\text{C}_{15}\text{H}_{19}\text{INO}_4\text{S}_2^+$  467.9795; Found 467.9797.

*S*-(6-Iodobenzo[*d*][1,3]dioxol-5-yl) 4-methylbenzenesulfonylthioate (**10e**)

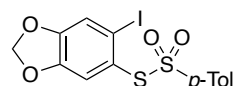

Yield: 71% (20.4 mg, 47.0  $\mu\text{mol}$ ); Colorless solid; Mp 69–73 °C; TLC  $R_f$  0.48 (*n*-hexane/EtOAc = 4/1);  $^1\text{H}$  NMR ( $\text{CDCl}_3$ , 400 MHz):  $\delta$  7.51–7.49 (AA'BB', 2H), 7.27–7.24 (m, 4H), 6.07 (s, 2H), 2.44 (s, 3H);  $^{13}\text{C}\{^1\text{H}\}$  NMR ( $\text{CDCl}_3$ , 101 MHz):  $\delta$  151.1, 149.0, 145.1, 140.6, 129.7, 127.7, 125.5, 119.3, 117.2, 102.7, 99.3, 21.7; IR (NaCl,  $\text{cm}^{-1}$ ) 813, 863, 933, 1036, 1079, 1143, 1236, 1328, 1464, 1471, 1475, 1480, 1504, 1594, 2910; HRMS (ESI)  $m/z$ :  $[\text{M}+\text{NH}_4]^+$  Calcd for  $\text{C}_{14}\text{H}_{15}\text{INO}_4\text{S}_2^+$  451.9482; Found 451.9482.

*S*-(2-Iodo-3-methoxyphenyl) 4-methylbenzenesulfonylthioate (**10f**)

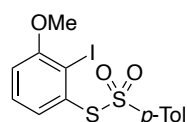

Yield: 51% (10.7 mg, 25.5  $\mu\text{mol}$ ); Pale yellow solid; Mp 81–84 °C; TLC  $R_f$  0.32 (*n*-hexane/EtOAc = 4/1);  $^1\text{H}$  NMR ( $\text{CDCl}_3$ , 400 MHz):  $\delta$  7.50–7.48 (AA'BB', 2H), 7.41–7.33 (m, 2H), 7.23–7.21 (AA'BB', 2H), 6.87 (dd, 1H,  $J$  = 8.0, 1.5 Hz), 3.87 (s, 3H), 2.42 (s, 3H);  $^{13}\text{C}\{^1\text{H}\}$  NMR ( $\text{CDCl}_3$ , 101 MHz):  $\delta$  159.4, 145.0, 140.9, 135.1, 130.4, 129.7, 129.6, 127.6, 113.0, 100.9, 56.9, 21.7; IR (NaCl,  $\text{cm}^{-1}$ ) 811, 1016, 1040, 1079, 1143, 1263, 1329, 1429, 1455, 1563, 2923; HRMS (ESI)  $m/z$ :  $[\text{M}+\text{NH}_4]^+$  Calcd for  $\text{C}_{14}\text{H}_{17}\text{INO}_3\text{S}_2^+$  437.9689; Found 437.9689.

*S*-(2-Iodo-3-((4-methoxyphenyl)thio)phenyl) 4-methylbenzenesulfonylthioate (**10g**)

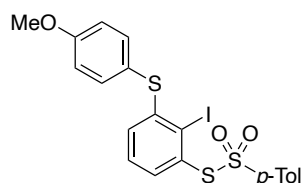

Yield: 67% (13.8 mg, 26.1  $\mu\text{mol}$ ); Colorless solid; Mp 73–76 °C; TLC  $R_f$  0.28 (*n*-hexane/EtOAc = 4/1);  $^1\text{H}$  NMR ( $\text{CDCl}_3$ , 400 MHz):  $\delta$  7.50–7.44 (m, 5H), 7.26–7.24 (m, 2H), 7.15 (dd, 1H,  $J$  = 7.8, 7.8 Hz), 7.00–6.97 (AA'BB', 2H), 6.61 (dd, 1H,  $J$  = 7.8, 1.4 Hz), 3.87 (s, 3H), 2.45 (s, 3H);  $^{13}\text{C}\{^1\text{H}\}$  NMR ( $\text{CDCl}_3$ , 101 MHz):  $\delta$  160.9, 148.2, 145.2, 140.8, 137.2, 135.1, 134.1, 129.7, 129.0, 128.5, 127.7, 123.2, 115.7, 109.4, 55.5, 21.8; IR (NaCl,  $\text{cm}^{-1}$ ) 811, 829, 1030, 1079, 1143, 1173, 1252, 1291, 1331, 1424, 1494, 1591, 1729, 2928; HRMS (ESI)  $m/z$ :  $[\text{M}+\text{NH}_4]^+$  Calcd for  $\text{C}_{20}\text{H}_{21}\text{INO}_3\text{S}_3^+$  545.9723; Found 545.9725.

## Characterization Data of Other New Compounds

### 5-Morpholinobenzo[*d*][1,3]dithiol-2-one (**4**)

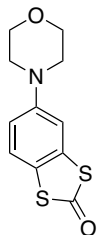

Yield: 30% (11.9 mg, 47.0  $\mu\text{mol}$ ); Colorless solid; Mp 147–150  $^{\circ}\text{C}$ ; TLC  $R_f$  0.30 (*n*-hexane/EtOAc = 4/1);  $^1\text{H}$  NMR ( $\text{CDCl}_3$ , 400 MHz):  $\delta$  7.34 (d, 1H,  $J = 8.8$  Hz), 6.99 (d, 1H,  $J = 2.5$  Hz), 6.91 (dd, 1H,  $J = 8.8, 2.5$  Hz), 3.88–3.86 (AA'BB', 4H), 3.17–3.15 (AA'BB', 4H);  $^{13}\text{C}\{^1\text{H}\}$  NMR ( $\text{CDCl}_3$ , 101 MHz):  $\delta$  190.9, 150.6, 133.9, 123.5, 122.3, 115.6, 109.5, 66.7, 49.1; IR (NaCl,  $\text{cm}^{-1}$ ) 1012, 1242, 1478, 1590, 1630, 2958; HRMS (ESI)  $m/z$ :  $[\text{M}+\text{H}]^+$  Calcd for  $\text{C}_{11}\text{H}_{12}\text{NO}_2\text{S}_2^+$  254.0304; Found 254.0303.

### 1,2-Bis(3,4-dimethylphenyl) disulfide (**11a**)

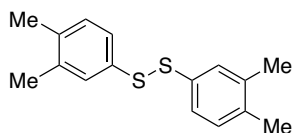

Yield: quant. (6.9 mg, 25  $\mu\text{mol}$ ); Colorless solid; Mp 43–46  $^{\circ}\text{C}$ ; TLC  $R_f$  0.69 (*n*-hexane/EtOAc = 4/1);  $^1\text{H}$  NMR ( $\text{CDCl}_3$ , 400 MHz):  $\delta$  7.27–7.26 (m, 2H), 7.23 (dd, 2H,  $J = 7.9, 2.0$  Hz), 7.06 (d, 2H,  $J = 7.9$  Hz), 2.22 (s, 6H + 6H);  $^{13}\text{C}\{^1\text{H}\}$  NMR ( $\text{CDCl}_3$ , 101 MHz):  $\delta$  137.5, 136.1, 134.1, 130.2, 129.5, 125.9, 19.8, 19.4; IR (NaCl,  $\text{cm}^{-1}$ ) 808, 877, 1128, 1382, 1448, 1485, 1595, 2920; HRMS (ESI)  $m/z$ :  $[\text{M}+\text{Na}]^+$  Calcd for  $\text{C}_{16}\text{H}_{18}\text{NaS}_2^+$  297.0748; Found 297.0748.

### Ethyl 4-((3,4-dimethylphenyl)thio)benzoate (**15b**)

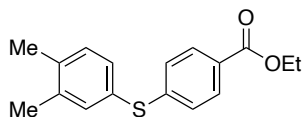

Yield: 93% (10.3 mg, 35.9  $\mu\text{mol}$ ); Colorless oil; TLC  $R_f$  0.52 (*n*-hexane/EtOAc = 4/1);  $^1\text{H}$  NMR ( $\text{CDCl}_3$ , 400 MHz):  $\delta$  7.89–7.86 (AA'BB', 2H), 7.30–7.28 (br, 1H), 7.26–7.24 (m, 1H), 7.18–7.13 (m, 3H), 4.34 (q, 2H,  $J = 7.1$  Hz), 2.29 (s, 3H), 2.26 (s, 3H), 1.37 (t, 3H,  $J = 7.1$  Hz);  $^{13}\text{C}\{^1\text{H}\}$  NMR ( $\text{CDCl}_3$ , 101 MHz):  $\delta$  166.3, 145.4, 138.3, 137.9, 135.4, 131.9, 130.9, 130.0, 128.3, 127.3, 126.7, 60.9, 19.7, 19.6, 14.4; IR (NaCl,  $\text{cm}^{-1}$ ) 816, 827, 1017, 1106, 1177, 1274, 1401, 1487, 1593, 1714; HRMS (ESI)  $m/z$ :  $[\text{M}+\text{H}]^+$  Calcd for  $\text{C}_{17}\text{H}_{19}\text{O}_2\text{S}^+$  287.1100; Found 287.1099.

### 3-(((3,4-Dimethylphenyl)thio)ethynyl)thiophene (**15c**)

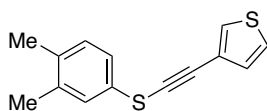

Yield: 91% (14.4 mg, 58.9  $\mu\text{mol}$ ); Colorless oil; TLC  $R_f$  0.71 (*n*-hexane/EtOAc = 4/1);  $^1\text{H}$  NMR ( $\text{CDCl}_3$ , 400 MHz):  $\delta$  7.54 (dd, 1H,  $J = 3.0, 1.2$  Hz), 7.29 (dd, 1H,  $J = 5.0, 3.0$  Hz), 7.23–7.21 (m, 2H), 7.18 (dd, 1H,  $J = 7.6$  Hz), 7.11 (d, 1H,  $J = 7.6$  Hz), 2.26 (s, 3H), 2.24 (s, 3H);  $^{13}\text{C}\{^1\text{H}\}$  NMR ( $\text{CDCl}_3$ , 101 MHz):  $\delta$  137.9, 135.4, 130.5, 130.2, 129.9, 129.2, 127.8, 125.4, 124.2, 122.2, 91.9, 75.8, 19.9, 19.4; IR (NaCl,  $\text{cm}^{-1}$ ) 804, 873, 1020, 1080, 1261, 1447, 1488, 1597, 2163, 2358, 2920, 3106; HRMS (EI)  $m/z$ :  $[\text{M}]^+$  Calcd for  $\text{C}_{14}\text{H}_{12}\text{S}_2^+$  244.0380; Found 244.0381.

2-Bromo-4,5-difluorophenyl 3,5-dimethoxyphenyl sulfide

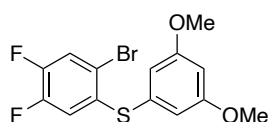

Yield: 71% (12.9 mg, 35.7  $\mu\text{mol}$ ); Colorless solid; Mp 53–56 °C; TLC  $R_f$  0.50 (*n*-hexane/EtOAc = 4/1);  $^1\text{H}$  NMR ( $\text{CDCl}_3$ , 400 MHz):  $\delta$  7.41 (dd, 1H,  $J$  = 9.4, 7.4 Hz), 6.81 (dd, 1H,  $J$  = 10.8, 7.9 Hz), 6.59 (d, 2H,  $J$  = 2.6 Hz), 6.48 (t, 1H,  $J$  = 2.6 Hz), 3.79 (s, 6H);  $^{13}\text{C}\{^1\text{H}\}$  NMR ( $\text{CDCl}_3$ , 101 MHz):  $\delta$  161.5, 150.5 (dd,  $J$  = 251, 12.9 Hz), 148.0 (dd,  $J$  = 252, 13.7 Hz), 135.3 (dd,  $J$  = 5.4, 3.8 Hz), 133.7, 121.7 (d,  $J$  = 20.4 Hz), 118.1 (d,  $J$  = 20.7 Hz), 116.3 (dd,  $J$  = 7.3, 3.7 Hz), 111.1, 101.4, 55.5;  $^{19}\text{F}\{^1\text{H}\}$  NMR ( $\text{CDCl}_3$ , 377 MHz):  $\delta$  -136.9 (d, 1F,  $J$  = 20.9 Hz), -138.1 (d, 1F,  $J$  = 20.9 Hz); IR (NaCl,  $\text{cm}^{-1}$ ) 838, 1063, 1158, 1205, 1281, 1366, 1422, 1480, 1590; HRMS (EI)  $m/z$ :  $[\text{M}]^{+}$  Calcd for  $\text{C}_{14}\text{H}_{11}\text{BrF}_2\text{S}^{+}$  359.9631; Found 359.9632.

(2-Bromo-5-fluoro-4-methoxyphenyl)(3,5-dimethoxyphenyl)- $\lambda^4$ -sulfanimine (**18d**)

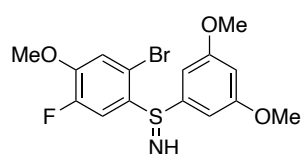

Yield: 80% (15.8 mg, 40.7  $\mu\text{mol}$ ); Pale yellow solid; Mp 101–104 °C; TLC  $R_f$  0.39 ( $\text{CH}_2\text{Cl}_2/\text{MeOH}$  = 10/1);  $^1\text{H}$  NMR ( $\text{CDCl}_3$ , 400 MHz):  $\delta$  7.56 (d, 1H,  $J$  = 10.4 Hz), 7.11 (d, 1H,  $J$  = 7.2 Hz), 6.72 (d, 2H,  $J$  = 2.2 Hz), 6.46 (t, 1H,  $J$  = 2.2 Hz), 3.90 (s, 3H), 3.78 (s, 6H), 1.92 (s, 1H);  $^{13}\text{C}\{^1\text{H}\}$  NMR ( $\text{CDCl}_3$ , 101 MHz):  $\delta$  161.3, 152.4 (d,  $J$  = 253 Hz), 150.3 (d,  $J$  = 11.7 Hz), 146.3, 136.8 (d,  $J$  = 2.6 Hz), 117.5, 115.7 (d,  $J$  = 3.8 Hz), 115.1 (d,  $J$  = 21.9 Hz), 103.8, 102.6, 56.7, 55.6;  $^{19}\text{F}\{^1\text{H}\}$  NMR ( $\text{CDCl}_3$ , 377 MHz):  $\delta$  -132.1 (s); IR (NaCl,  $\text{cm}^{-1}$ ) 1020, 1158, 1205, 1269, 1435, 1455, 1488, 1495, 1600; HRMS (ESI)  $m/z$ :  $[\text{M}+\text{H}]^{+}$  Calcd for  $\text{C}_{15}\text{H}_{16}\text{BrFNO}_3\text{S}^{+}$  388.0013; Found 388.0015.

*N*-(2-Bromophenyl)-3-fluoro-2-(*p*-tolylthio)aniline (**20a**)

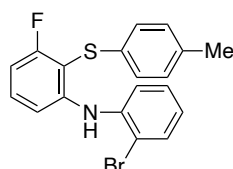

Yield: 56% (28.9 mg, 74.8  $\mu\text{mol}$ ); Colorless oil; TLC  $R_f$  0.49 (*n*-hexane/EtOAc = 4/1);  $^1\text{H}$  NMR ( $\text{CDCl}_3$ , 400 MHz):  $\delta$  7.56 (dd, 1H,  $J$  = 8.0, 1.4 Hz), 7.39 (dd, 1H,  $J$  = 8.0, 1.4 Hz), 7.28–7.22 (m, 3H), 7.16–7.14 (AA'BB', 2H), 7.05–7.03 (m, 3H), 6.88 (ddd, 1H,  $J$  = 8.0, 8.0, 1.4 Hz), 6.69 (ddd, 1H,  $J$  = 8.0, 8.0, 1.4 Hz), 2.27 (s, 3H);  $^{13}\text{C}\{^1\text{H}\}$  NMR ( $\text{CDCl}_3$ , 101 MHz):  $\delta$  164.3 (d,  $J$  = 247 Hz), 146.4 (d,  $J$  = 2.7 Hz), 139.3, 136.3, 133.3, 131.4, 131.3 (d,  $J$  = 10.7 Hz), 129.9, 128.0, 127.9, 123.7, 120.3, 116.0, 109.9 (d,  $J$  = 3.0 Hz), 107.10 (d,  $J$  = 21.3 Hz), 107.06 (d,  $J$  = 24.1 Hz), 21.0;  $^{19}\text{F}\{^1\text{H}\}$  NMR ( $\text{CDCl}_3$ , 377 MHz):  $\delta$  -103.4 (s); IR (NaCl,  $\text{cm}^{-1}$ ) 1025, 1119, 1182, 1246, 1325, 1398, 1447, 1520, 1605, 3360; HRMS (ESI)  $m/z$ :  $[\text{M}+\text{H}]^{+}$  Calcd for  $\text{C}_{19}\text{H}_{16}\text{BrFNS}^{+}$  388.0165; Found 388.0614.

3-(Benzyloxy)-*N*-(2-bromophenyl)-2-(*p*-tolylthio)aniline (**20b**)

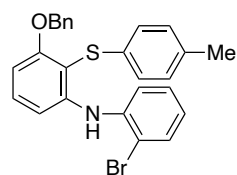

Yield: 69% (41.3 mg, 86.9  $\mu\text{mol}$ ); Colorless oil; TLC  $R_f$  0.53 (*n*-hexane/ $\text{CH}_2\text{Cl}_2$  = 1/1);  $^1\text{H}$  NMR ( $\text{CDCl}_3$ , 400 MHz):  $\delta$  7.54 (dd, 1H,  $J$  = 8.0, 1.5 Hz), 7.43–7.41 (m, 2H), 7.30–7.20 (m, 7H), 7.14–7.11 (AA'BB', 2H), 7.03–7.01 (AA'BB', 2H), 6.94 (dd, 1H,  $J$  = 8.3, 1.0 Hz), 6.84 (ddd, 1H,  $J$  = 8.0, 8.0, 1.5 Hz), 5.12 (s, 3H), 2.28 (s, 3H);  $^{13}\text{C}\{^1\text{H}\}$  NMR ( $\text{CDCl}_3$ , 101 MHz):  $\delta$  160.5, 146.3, 139.9, 136.9, 135.5, 133.2, 133.0, 130.9, 129.7, 128.4, 127.9,

127.7, 127.6, 126.9, 123.0, 119.8, 115.7, 108.2, 108.0, 104.7, 70.4, 21.0; IR (NaCl,  $\text{cm}^{-1}$ ) 1023, 1066, 1263, 1293, 1377, 1446, 1463, 1490, 1515, 1582; HRMS (ESI)  $m/z$ :  $[\text{M}+\text{H}]^+$  Calcd for  $\text{C}_{26}\text{H}_{23}\text{BrNOS}^+$  476.0678; Found 476.0678.

*N*-(2-Bromophenyl)-4-(*p*-tolylthio)dibenzo[*b,d*]furan-3-amine (**20c**)

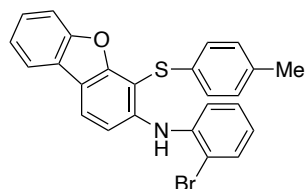

Yield: 45% (28.7 mg, 62.6  $\mu\text{mol}$ ); Colorless oil; TLC  $R_f$  0.34 (*n*-hexane/ $\text{CH}_2\text{Cl}_2$  = 1/1);  $^1\text{H}$  NMR ( $\text{CDCl}_3$ , 400 MHz):  $\delta$  7.86–7.84 (m, 2H), 7.59–7.55 (m, 2H), 7.44 (dd, 1H,  $J$  = 8.0, 1.4 Hz), 7.40–7.36 (m, 1H), 7.34–7.29 (m, 3H), 7.25–7.21 (m, 1H), 7.19–7.16 (AA'BB', 2H), 7.01–6.99 (AA'BB', 2H), 6.87 (ddd, 1H,  $J$  = 8.0, 8.0, 1.4 Hz), 2.24 (s, 3H);  $^{13}\text{C}\{^1\text{H}\}$  NMR ( $\text{CDCl}_3$ , 101 MHz):  $\delta$  159.1, 156.2, 144.5, 139.9, 136.2, 133.3, 131.5, 129.9, 128.0, 127.9, 126.0, 124.8, 123.2, 123.1, 122.3, 119.7, 119.3, 117.5, 115.5, 111.8, 111.3, 103.0, 20.9; IR (NaCl,  $\text{cm}^{-1}$ ) 1143, 1186, 1322, 1417, 1447, 1520, 1585; HRMS (ESI)  $m/z$ :  $[\text{M}+\text{Na}]^+$  Calcd for  $\text{C}_{25}\text{H}_{18}\text{BrNNaOS}^+$  484.0170; Found 484.0172.

*N*-(2-Bromo-5-fluoro-4-methoxyphenyl)-4-((3,5-dimethoxyphenyl)thio)dibenzo[*b,d*]furan-3-amine (**20d**)

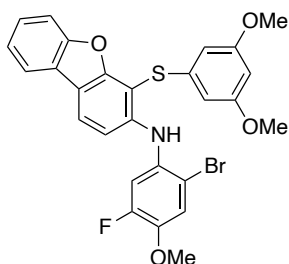

Yield: 48% (6.5 mg, 12  $\mu\text{mol}$ ); Pale yellow oil; TLC  $R_f$  0.34 (*n*-hexane/EtOAc = 4/1);  $^1\text{H}$  NMR ( $\text{CDCl}_3$ , 400 MHz):  $\delta$  7.87–7.84 (m, 2H), 7.58–7.56 (m, 1H), 7.40–7.30 (m, 2H), 7.22 (d, 1H,  $J$  = 12.4 Hz), 7.17 (d, 1H,  $J$  = 8.6 Hz), 7.11 (d, 1H,  $J$  = 8.6 Hz), 6.96 (s, 1H), 6.37 (d, 2H,  $J$  = 2.2 Hz), 6.22 (d, 1H,  $J$  = 2.2 Hz), 3.88 (s, 3H), 3.67 (s, 6H);  $^{13}\text{C}\{^1\text{H}\}$  NMR ( $\text{CDCl}_3$ , 101 MHz):  $\delta$  161.2, 159.2, 156.1, 147.9 (d,  $J$  = 247 Hz), 145.3, 144.0 (d,  $J$  = 12.0 Hz), 137.2, 133.2 (d,  $J$  = 8.8 Hz), 126.0, 124.8, 123.0 (d,  $J$  = 17.6 Hz), 119.7, 118.0 (d,  $J$  = 2.3 Hz), 117.4, 111.8, 110.62, 110.59, 110.2, 109.7 (d,  $J$  = 22.1 Hz), 105.0, 100.6, 98.5, 56.9, 55.4;  $^{19}\text{F}\{^1\text{H}\}$  NMR ( $\text{CDCl}_3$ , 377 MHz):  $\delta$  -133.2 (s); IR (NaCl,  $\text{cm}^{-1}$ ) 810, 1040, 1156, 1205, 1251, 1295, 1418, 1455, 1505, 1593, 2936, 3351; HRMS (ESI)  $m/z$ :  $[\text{M}+\text{H}]^+$  Calcd for  $\text{C}_{27}\text{H}_{22}\text{BrFNO}_4\text{S}^+$  554.0431; Found 554.0432.

4-Fluoro-10-(*p*-tolyl)-10*H*-phenothiazine (**21a**)

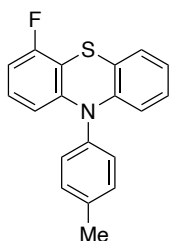

Yield: 61% (14.0 mg, 45.6  $\mu\text{mol}$ ); Colorless solid; Mp 146–149  $^\circ\text{C}$ ; TLC  $R_f$  0.66 (*n*-hexane/EtOAc = 4/1);  $^1\text{H}$  NMR ( $\text{CDCl}_3$ , 400 MHz):  $\delta$  7.41–7.39 (AA'BB', 2H), 7.25–7.23 (m, 2H), 6.99 (m, 1H), 6.84–6.70 (m, 3H), 6.55 (dd, 1H,  $J$  = 8.4, 1.0 Hz), 6.12 (d, 1H,  $J$  = 8.1, 1.3 Hz), 5.90 (d, 1H,  $J$  = 8.4 Hz), 2.46 (s, 3H);  $^{13}\text{C}\{^1\text{H}\}$  NMR ( $\text{CDCl}_3$ , 101 MHz):  $\delta$  158.1 (d,  $J$  = 241 Hz), 145.7 (d,  $J$  = 4.5 Hz), 143.8, 138.6, 137.9, 131.6, 130.8, 127.1, 126.9, 126.7 (d,  $J$  = 9.5 Hz), 122.5, 117.8, 115.9, 111.2 (d,  $J$  = 2.5 Hz), 108.5 (d,  $J$  = 21.7 Hz), 107.6 (d,  $J$  = 22.9 Hz), 21.3;  $^{19}\text{F}\{^1\text{H}\}$  NMR ( $\text{CDCl}_3$ , 400 MHz):  $\delta$  -113.9 (s); IR (NaCl,  $\text{cm}^{-1}$ ) 1023, 1047, 1211, 1239, 1316, 1455, 1483, 1512, 1600; HRMS (EI)  $m/z$ :  $[\text{M}]^+$  Calcd for  $\text{C}_{19}\text{H}_{14}\text{FN}^+$  307.0831; Found 307.0831.

4-(Benzyloxy)-10-(*p*-tolyl)-10*H*-phenothiazine (**21b**)

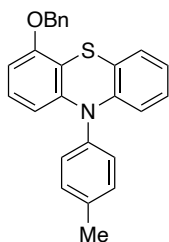

Yield: 73% (25.1 mg, 63.4  $\mu\text{mol}$ ); Brown solid; Mp 160–163  $^{\circ}\text{C}$ ; TLC  $R_f$  0.71 (*n*-hexane/EtOAc = 4/1);  $^1\text{H}$  NMR ( $\text{CDCl}_3$ , 400 MHz):  $\delta$  7.49–7.47 (AA'BB', 2H), 7.43–7.33 (m, 5H), 7.26–7.23 (m, 2H), 6.99–6.97 (m, 1H), 6.76–6.66 (m, 3H), 6.39 (d, 1H,  $J = 8.2$  Hz), 6.06–6.04 (m, 1H), 5.74 (d, 1H,  $J = 8.4$  Hz), 5.12 (s, 2H), 2.45 (s, 3H);  $^{13}\text{C}\{^1\text{H}\}$  NMR ( $\text{CDCl}_3$ , 101 MHz):  $\delta$  153.9, 144.7, 143.7, 138.4, 138.2, 136.9, 131.5, 130.9, 128.6, 127.9, 127.0, 126.8, 126.7, 126.3, 122.0, 119.1, 115.6, 109.4, 108.6, 106.0, 70.7, 21.3; IR (NaCl,  $\text{cm}^{-1}$ ) 1067, 1087, 1249, 1299, 1451, 1573, 1594, 3029; HRMS (EI)  $m/z$ :  $[\text{M}]^+$  Calcd for  $\text{C}_{26}\text{H}_{21}\text{NOS}^+$  395.1338; Found 395.1339.

5-(*p*-Tolyl)-5*H*-benzofuro[3,2-*c*]phenothiazine (**21c**)

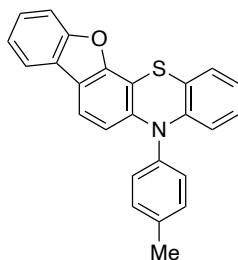

Yield: 42% (56.6 mg, 149  $\mu\text{mol}$ ); Yellow solid; Mp 136–139  $^{\circ}\text{C}$ ; TLC  $R_f$  0.36 (*n*-hexane/ $\text{CH}_2\text{Cl}_2$  = 5/1);  $^1\text{H}$  NMR (Acetone- $d_6$ , 400 MHz):  $\delta$  7.90 (d, 1H,  $J = 7.6$  Hz), 7.60 (d, 1H,  $J = 8.2$  Hz), 7.55–7.52 (m, 3H), 7.44 (dd, 1H,  $J = 7.4, 1.3$  Hz), 7.37–7.31 (m, 3H), 7.10 (dd, 1H,  $J = 7.4, 1.7$  Hz), 6.94–6.84 (m, 2H), 6.25 (d, 1H,  $J = 8.6$  Hz), 6.22 (dd, 1H,  $J = 8.2, 1.3$  Hz), 2.48 (s, 3H);  $^{13}\text{C}\{^1\text{H}\}$  NMR (Acetone- $d_6$ , 101 MHz):  $\delta$  157.1, 153.1, 145.0, 144.6, 139.5, 139.2, 132.5, 131.6, 128.3, 127.8, 127.3, 124.9, 124.2, 123.7, 121.2, 119.6, 119.0, 118.6, 117.3, 112.9, 112.3, 103.3, 21.2; IR (NaCl,  $\text{cm}^{-1}$ ) 871, 927, 1025, 1046, 1192, 1283, 1311, 1349, 1412, 1451, 1600, 3058; HRMS (EI)  $m/z$ :  $[\text{M}+\text{Na}]^+$  Calcd for  $\text{C}_{25}\text{H}_{17}\text{NNaOS}^+$  402.0928; Found 402.0928.

## References for Supporting Information

- S1 B. S. Shaibu, R. K. Kawade, R.-S. Liu, *Org. Biomol. Chem.* **2012**, *10*, 6834.
- S2 W. Bao, Z.-P. Gao, D.-P. Jin, C.-G. Xue, H. Liang, L.-S. Lei, X.-T. Xu, K. Zhang, S.-H. Wang, *Chem. Commun.* **2020**, *56*, 7641.
- S3 X. Li, Y. Sun, X. Huang, L. Zhang, L. Kong, B. Peng, *Org. Lett.* **2017**, *19*, 838.
- S4 Y. Nakamura, Y. Miyata, K. Uchida, S. Yoshida, T. Hosoya, *Org. Lett.* **2019**, *21*, 5252.
- S5 S. Yoshida, Y. Nakamura, K. Uchida, Y. Hazama, T. Hosoya, *Org. Lett.* **2016**, *18*, 6212.
- S6 S. Yoshida, Y. Hazama, K. Kanemoto, Y. Nakamura, T. Hosoya, *Chem. Lett.* **2019**, *48*, 742.
- S7 S. Yoshida, A. Nagai, K. Uchida, Y. Hazama, T. Hosoya, *Chem. Lett.* **2017**, *46*, 733.
- S8 T. Hamura, T. Hosoya, H. Yamaguchi, Y. Kuriyama, M. Tanabe, M. Miyamoto, Y. Yasui, T. Matsumoto, K. Suzuki, *Helv. Chim. Acta.* **2002**, *85*, 3589.
- S9 T. Morita, Y. Nishiyama, S. Yoshida, T. Hosoya, *Chem. Lett.* **2017**, *46*, 118.
- S10 D. I. Bugaenko, A. A. Volkov, V. V. Andreychev, A. V. Karchava J, *Org. Lett.* **2023**, *25*, 272.
- S11 S. Tabata, S. Yoshida, *Org. Lett.*, **2024**, *26*, 3816.
- S12 G.-Y. Zhang, S.-S. Lv, A. Shoberu, J.-P. Zou, *J. Org. Chem.* **2017**, *82*, 9801.
- S13 K. Muratov, E. Zaripov, M. V. Berezovski, F. Gagosz, *J. Am. Chem. Soc.* **2024**, *146*, 3660.
- S14 K. Kanemoto, S. Yoshida, T. Hosoya, *Org. Lett.* **2019**, *21*, 3172.
- S15 S. K. Sinha, S. Panja, J. Grover, P. S. Hazra, S. Pandit, Y. Bairagi, X. Zhang, D. Maiti, *J. Am. Chem. Soc.* **2022**, *144*, 12032.
- S16 T. Matsuzawa, T. Hosoya, S. Yoshida, *Org. Lett.* **2021**, *23*, 2347.

### <sup>1</sup>H and <sup>13</sup>C NMR Spectra of New Compounds

<sup>1</sup>H NMR (400 MHz) and <sup>13</sup>C NMR (101 MHz) spectra of methyl 1-(3-methoxy-5-((trifluoromethyl)sulfonyl)oxy)-4-(trimethylsilyl)phenyl)-1*H*-1,2,3-triazole-4-carboxylate (**1j**) (CDCl<sub>3</sub>)

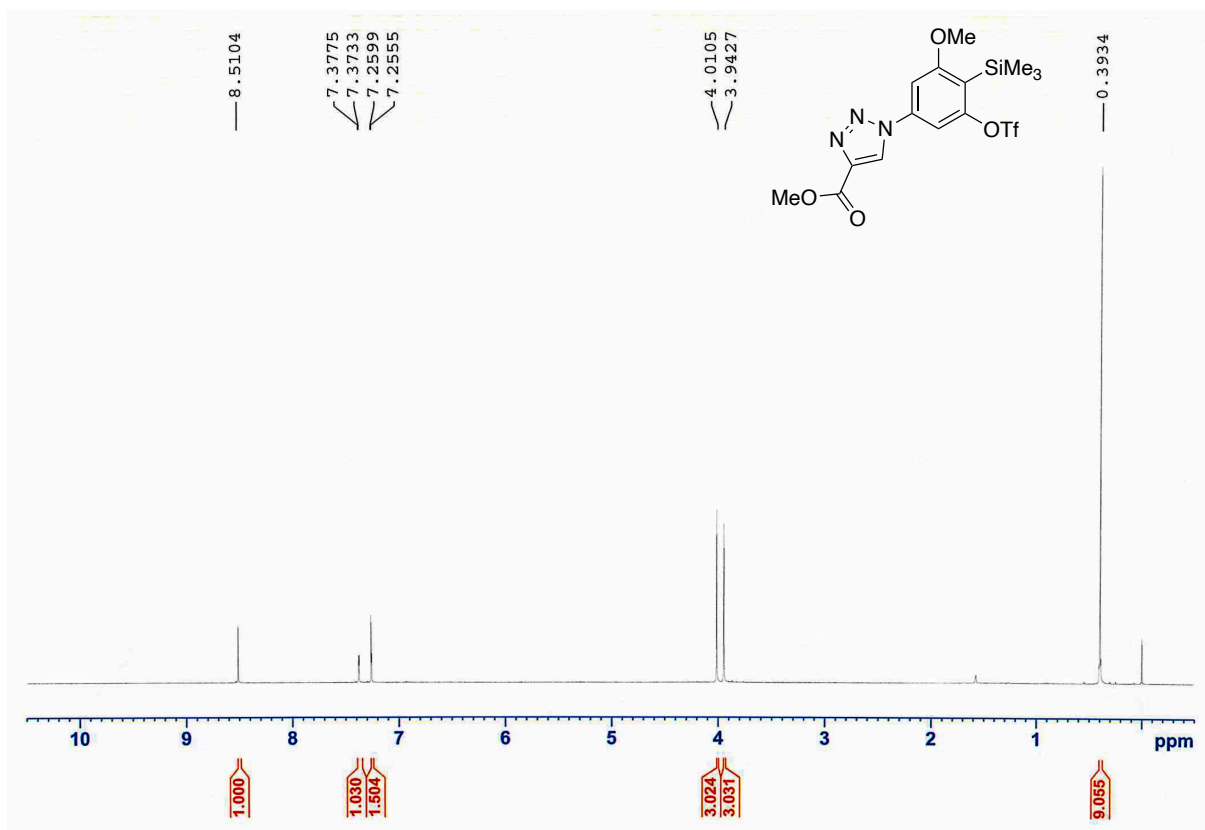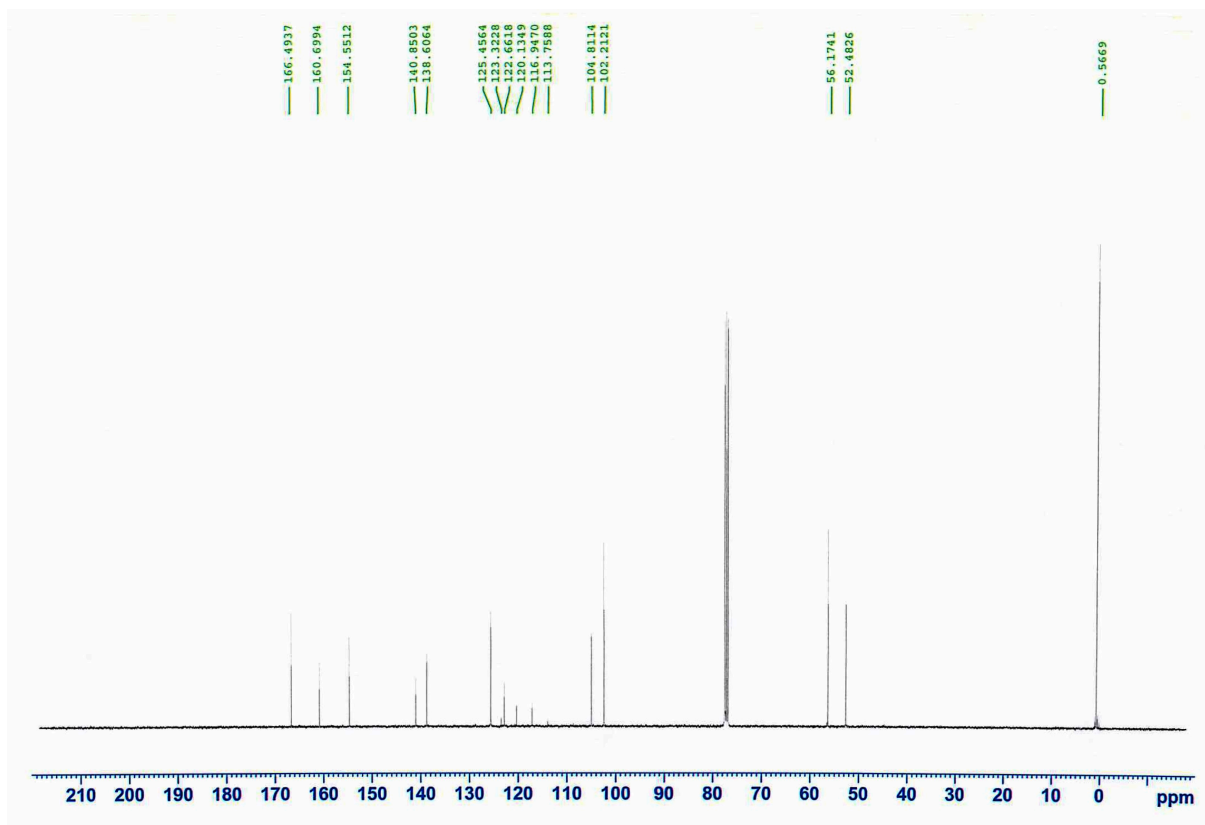

$^1\text{H}$  NMR (400 MHz) and  $^{13}\text{C}$  NMR (101 MHz) spectra of *S*-(3,4-dimethylphenyl) *O*-ethyl carbonodithioate (**2a**) ( $\text{CDCl}_3$ )

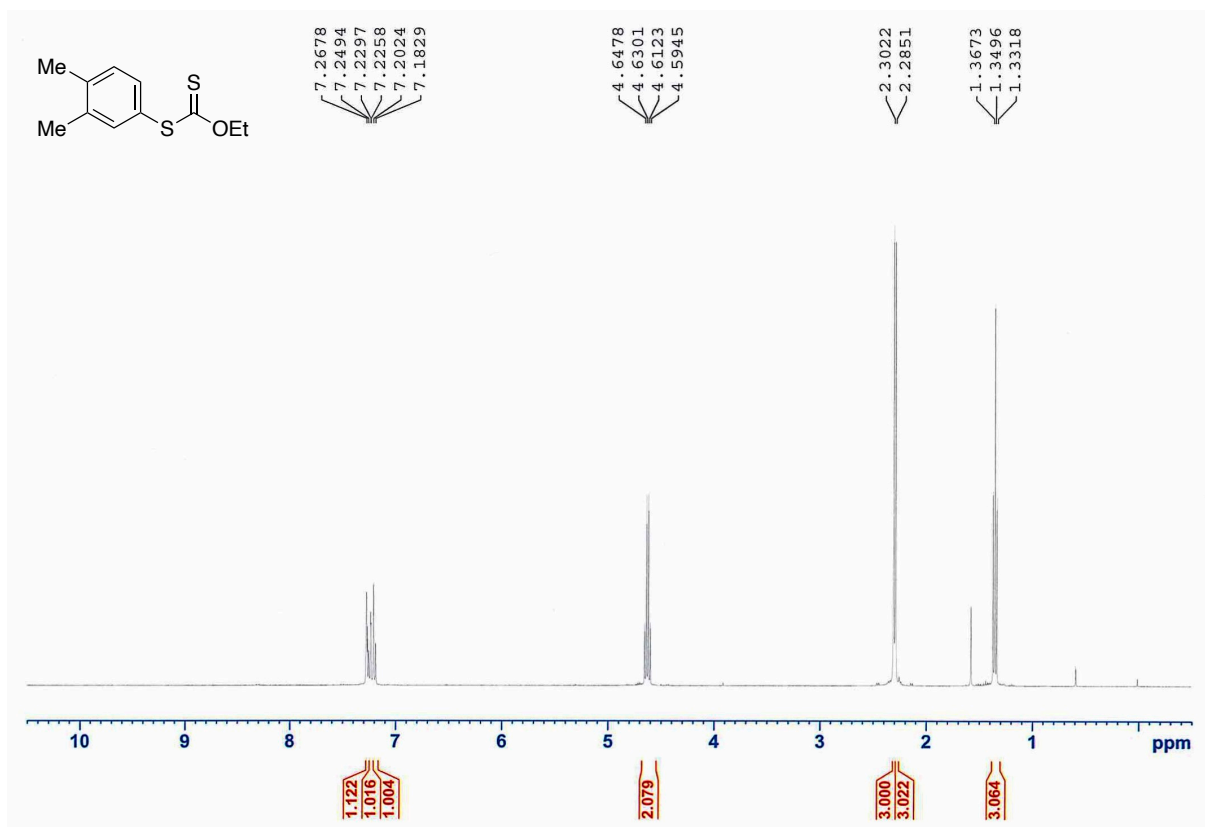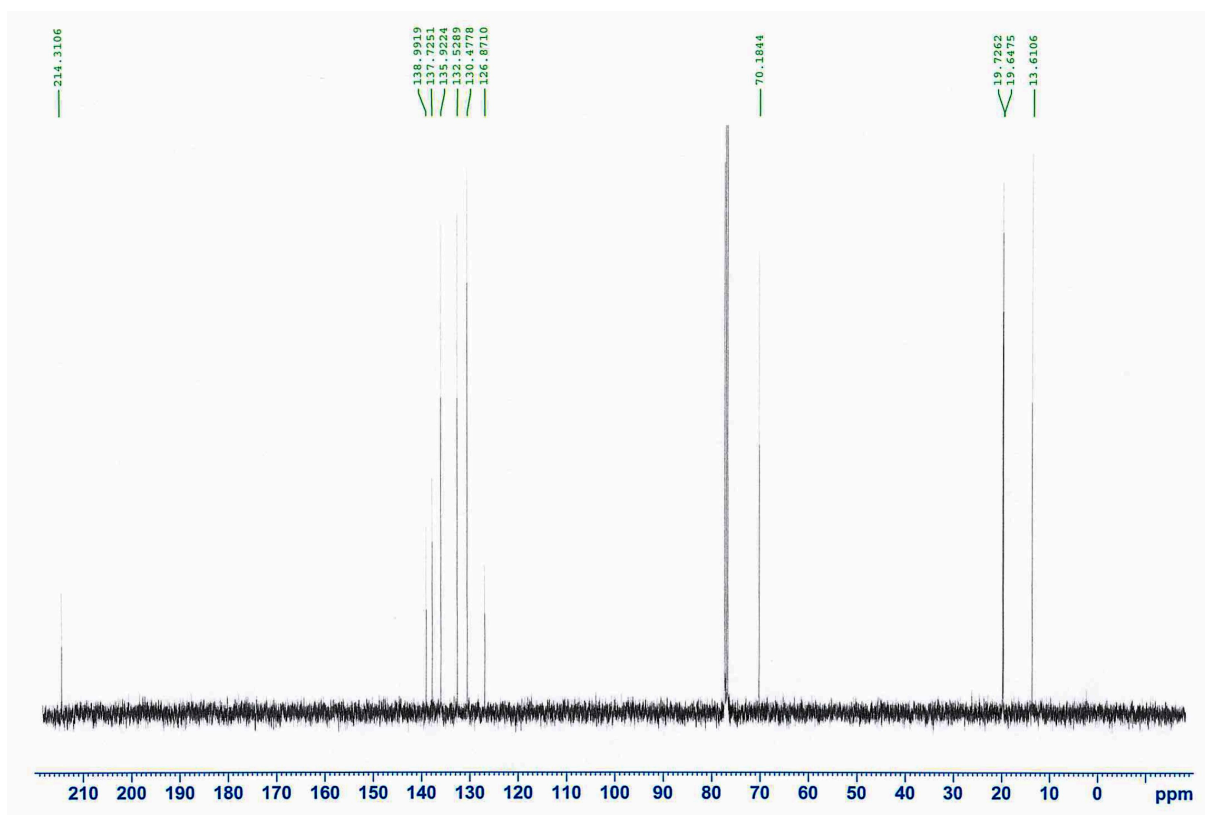

$^1\text{H}$  NMR (400 MHz) and  $^{13}\text{C}$  NMR (101 MHz) spectra of *S*-(3,4-dimethylphenyl) *O*-ethyl carbonodithioate (**2j**) ( $\text{CDCl}_3$ )

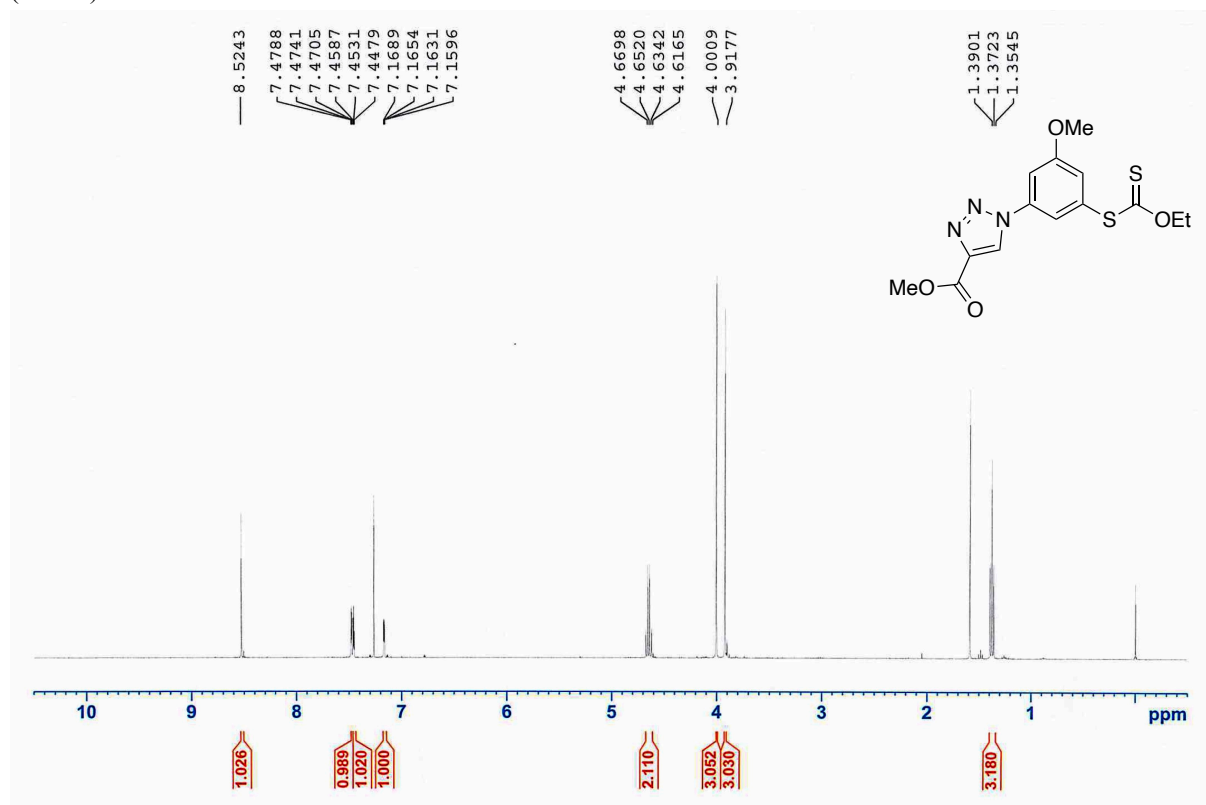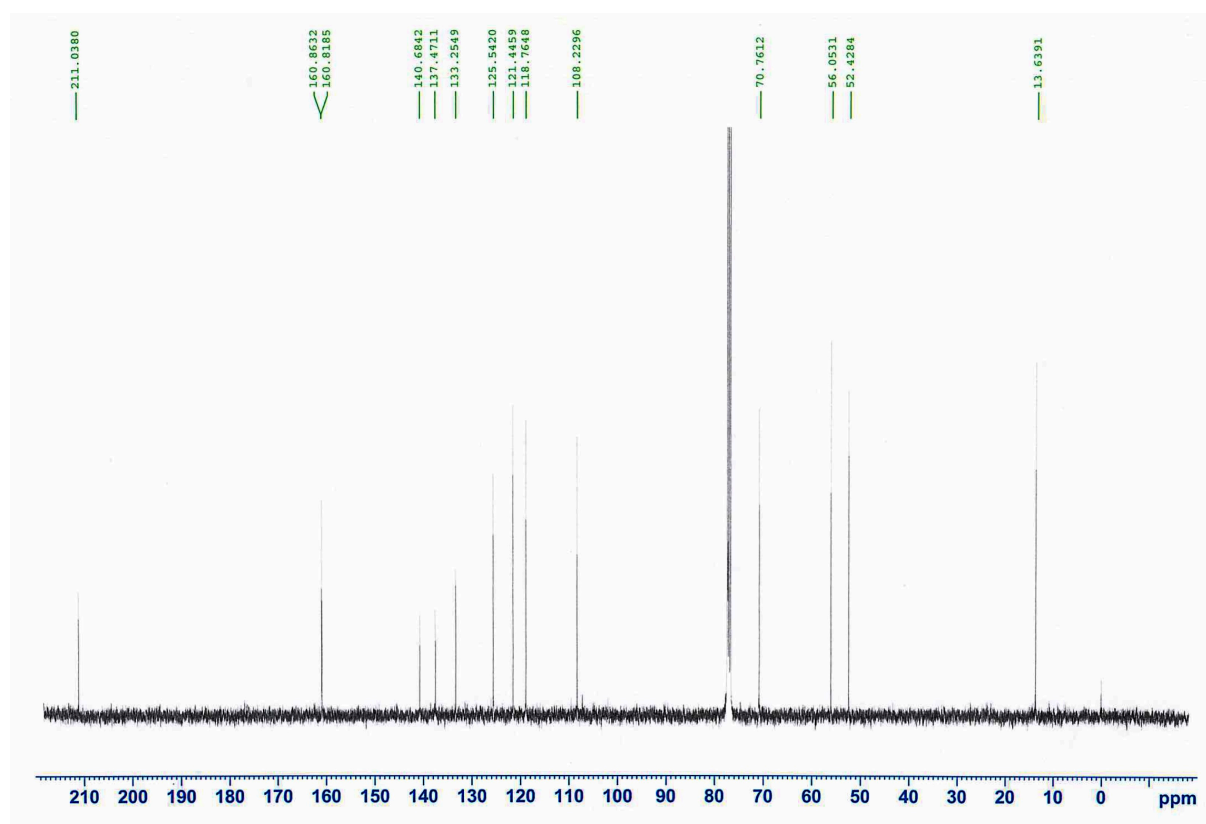

$^1\text{H}$  NMR (400 MHz) and  $^{13}\text{C}$  NMR (101 MHz) spectra of *S*-(2-bromo-4,5-dimethylphenyl) *O*-ethyl carbonodithioate (**6a**) ( $\text{CDCl}_3$ )

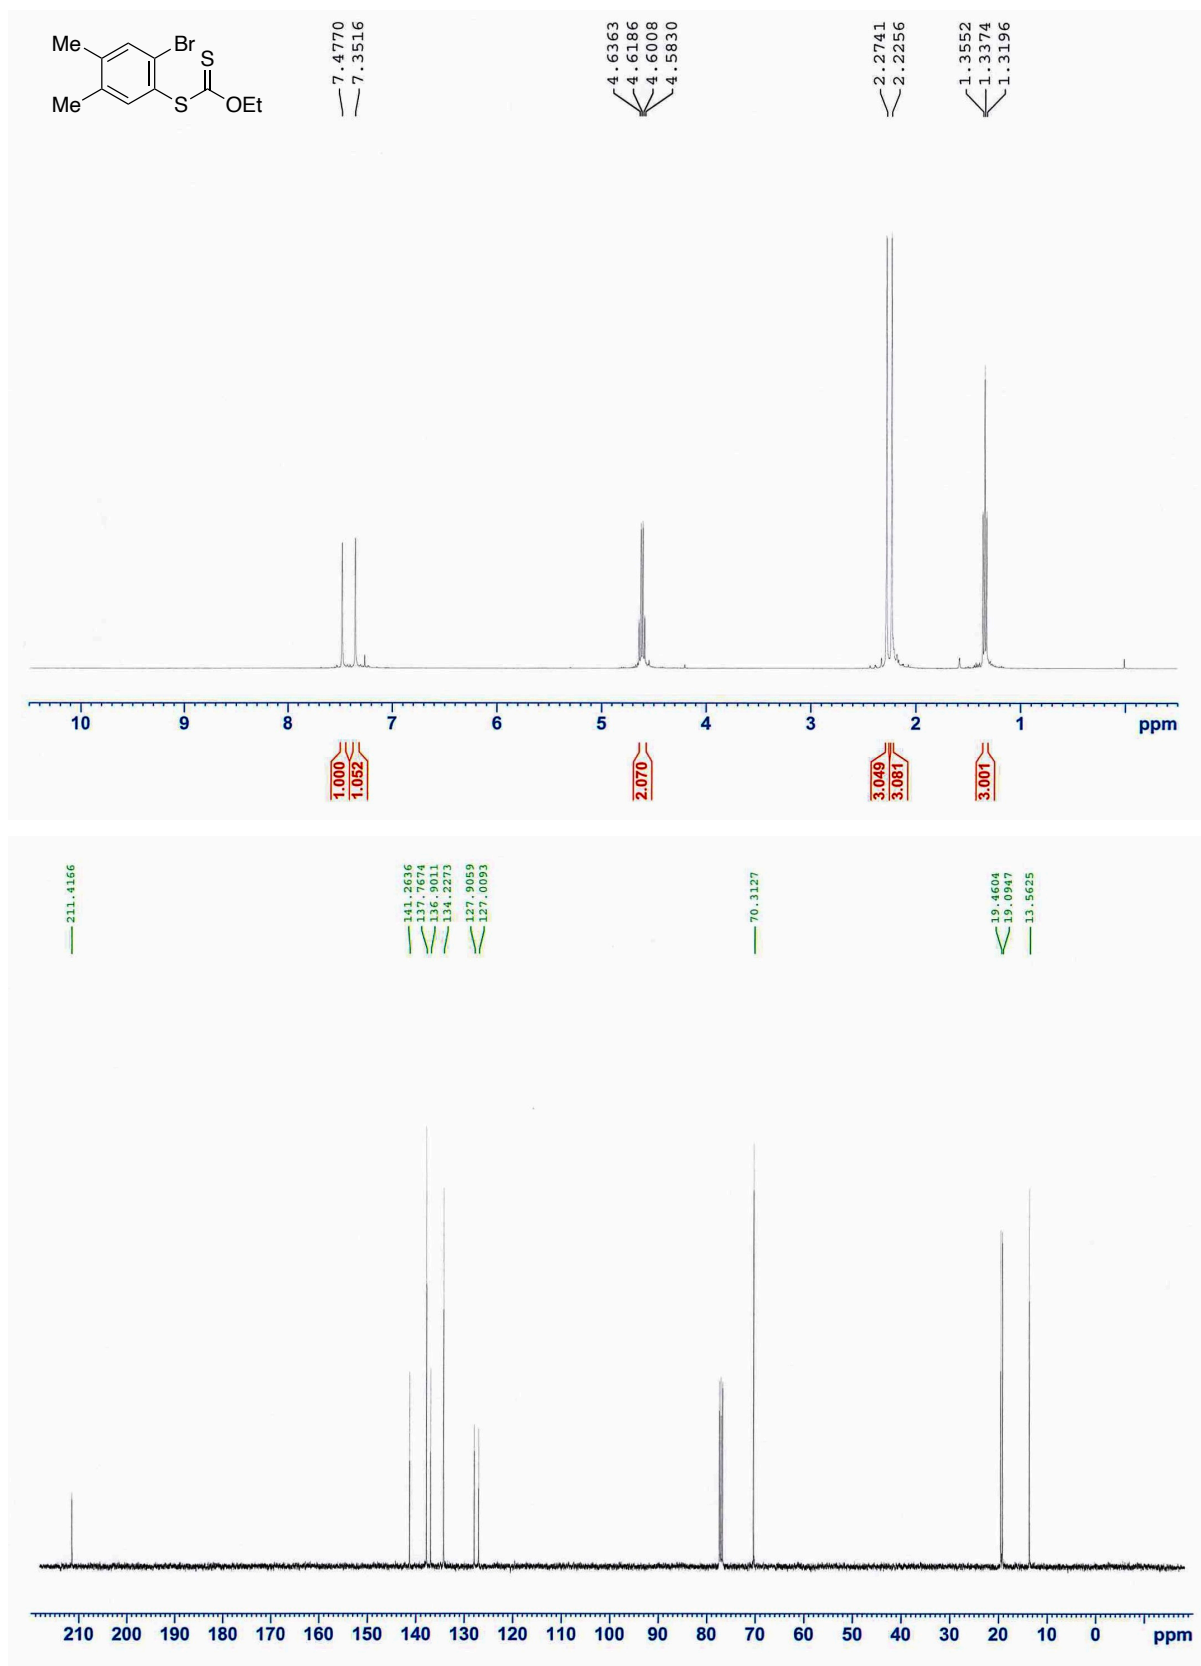

$^1\text{H}$  NMR (400 MHz) and  $^{13}\text{C}$  NMR (101 MHz) spectra of *S*-(2-chloro-4,5-dimethylphenyl) *O*-ethyl carbonodithioate (**7a**) ( $\text{CDCl}_3$ )

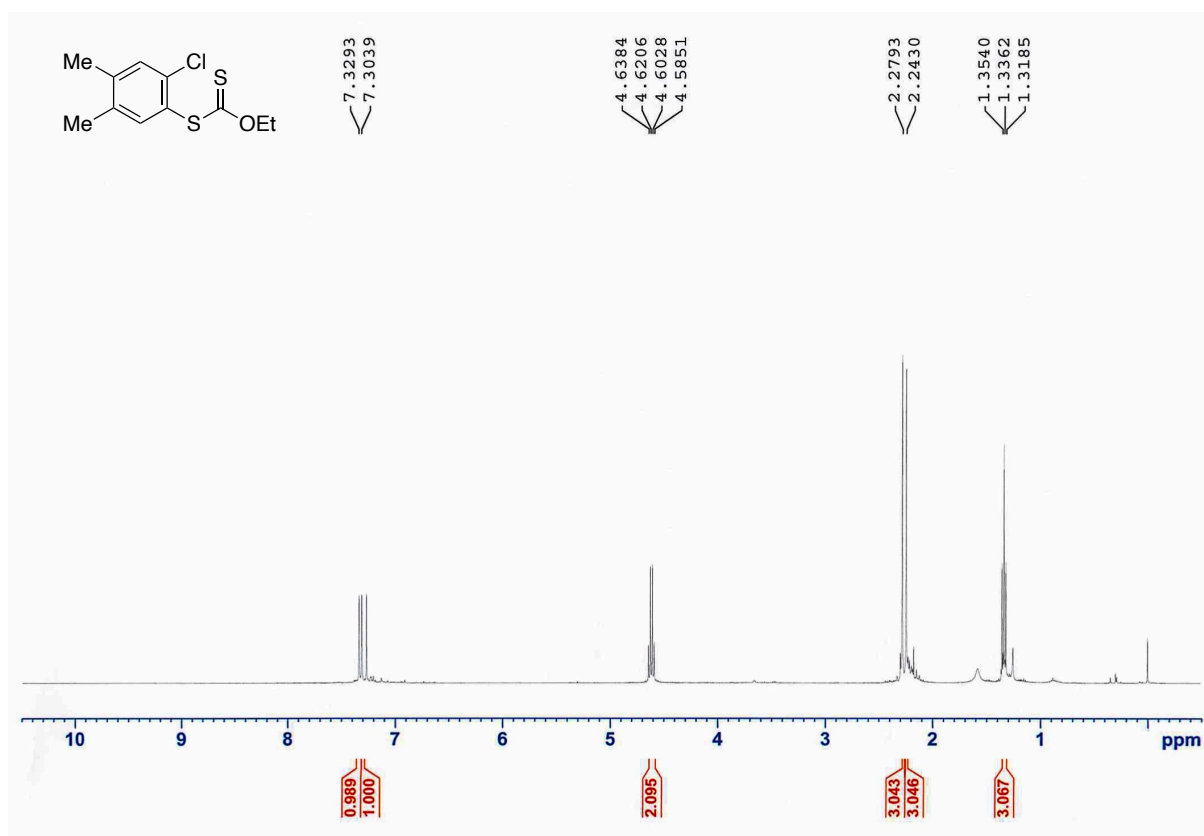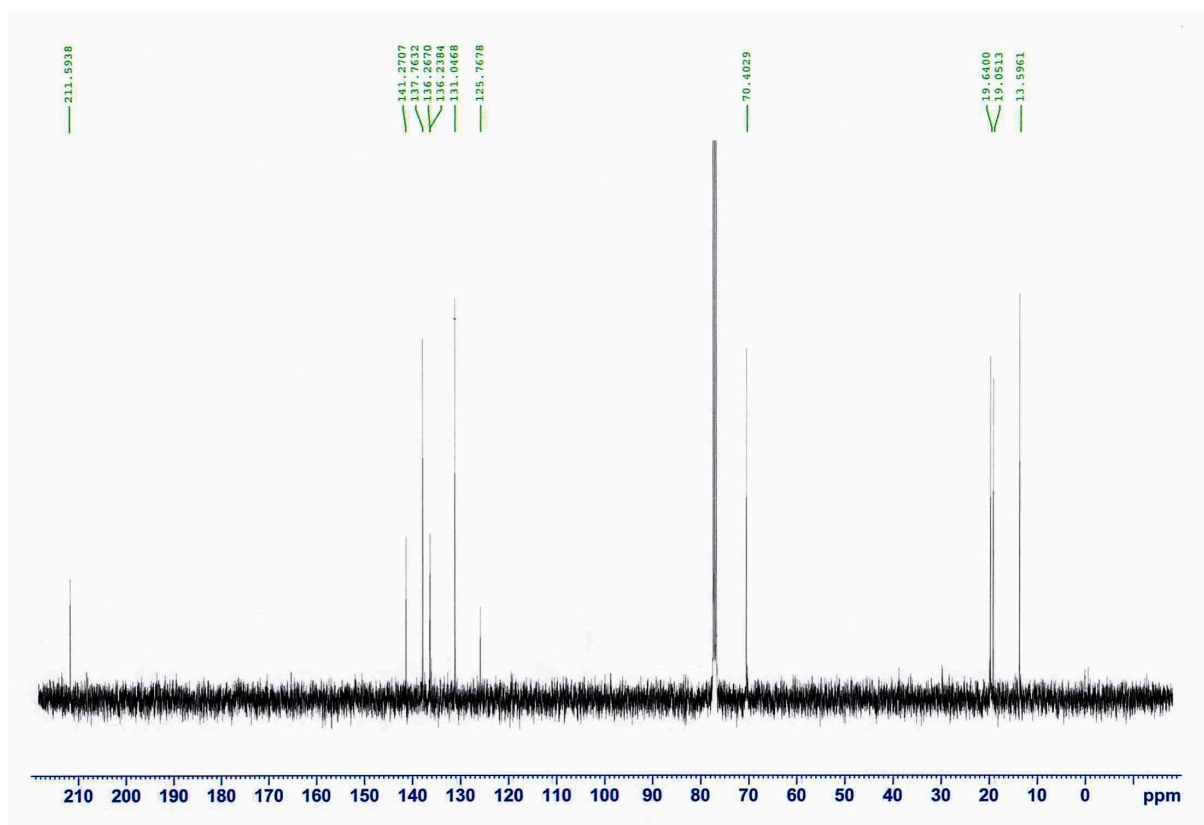

$^1\text{H}$  NMR (400 MHz) and  $^{13}\text{C}$  NMR (101 MHz) spectra of *O*-ethyl *S*-(2-iodo-4,5-dimethylphenyl) carbonodithioate (**8a**) ( $\text{CDCl}_3$ )

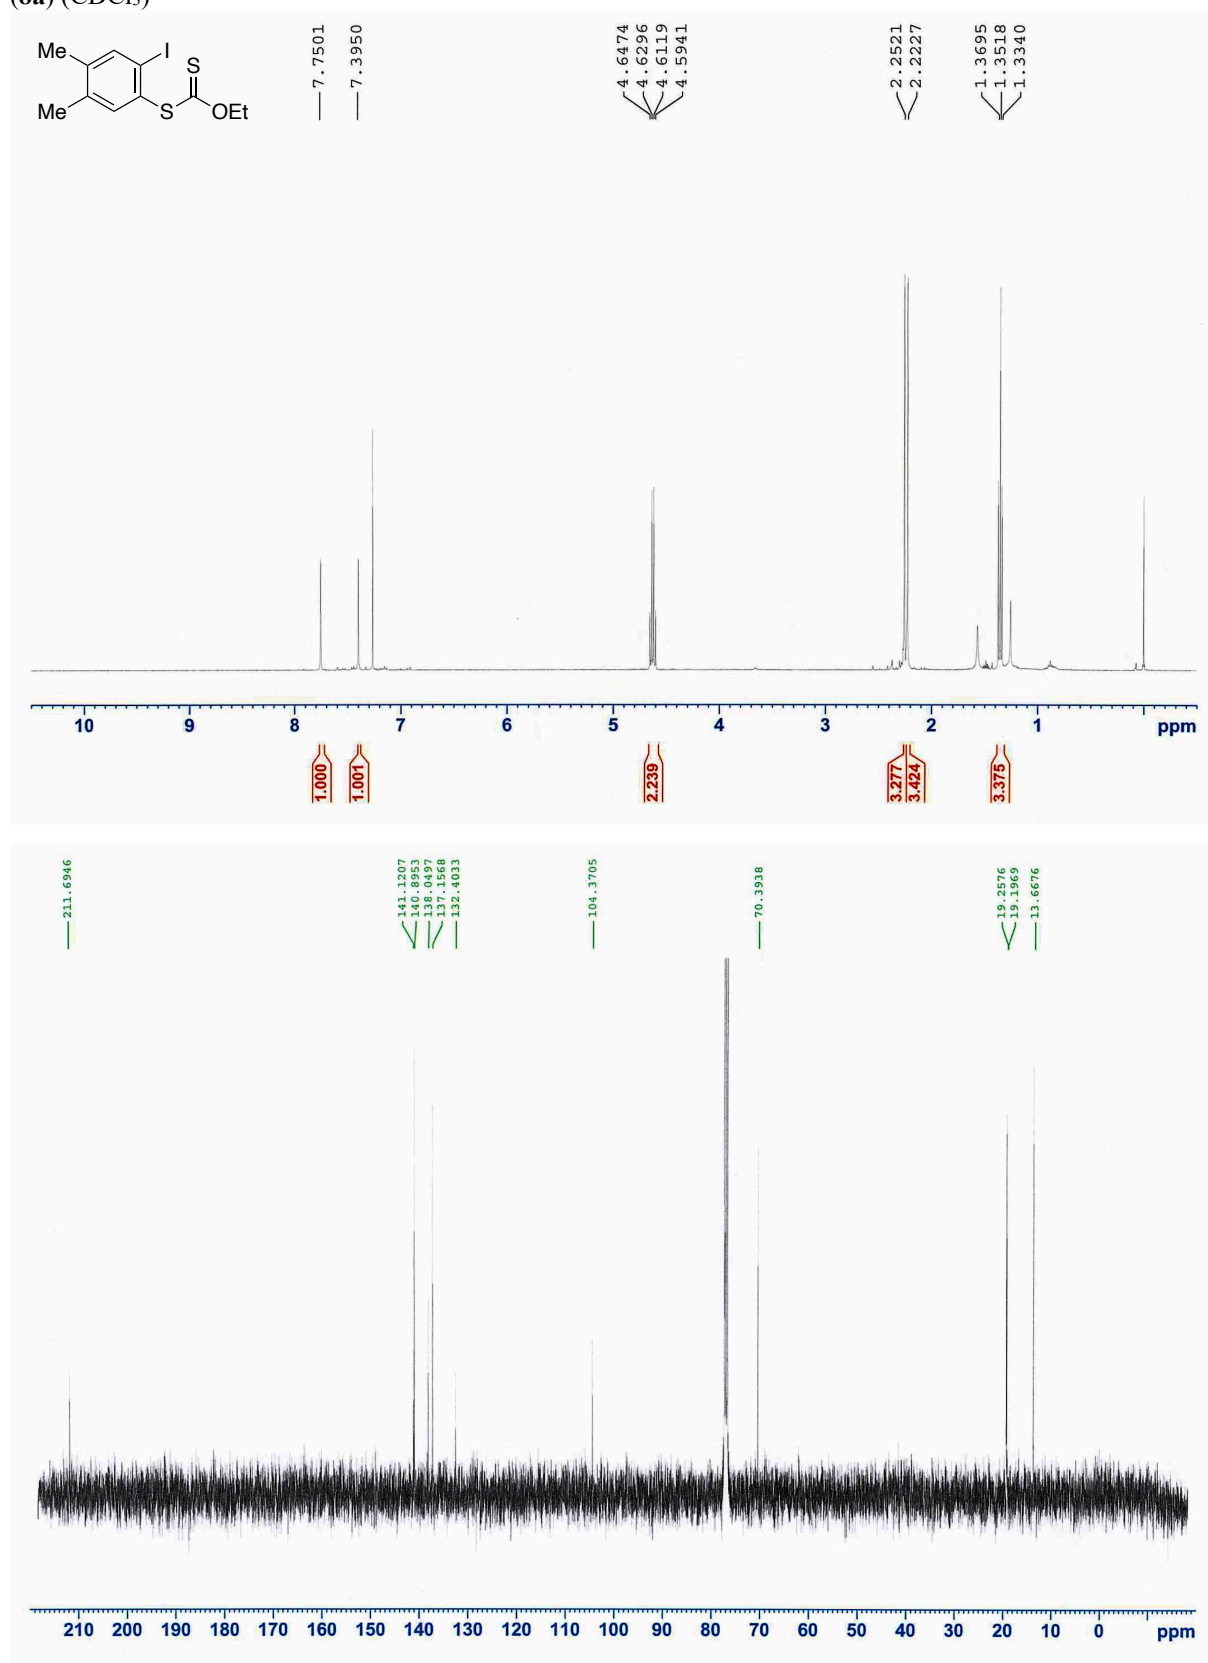

$^1\text{H}$  NMR (400 MHz) and  $^{13}\text{C}$  NMR (101 MHz) spectra of *O*-ethyl *S*-(2-iodophenyl) carbonodithioate (**8b**) ( $\text{CDCl}_3$ )

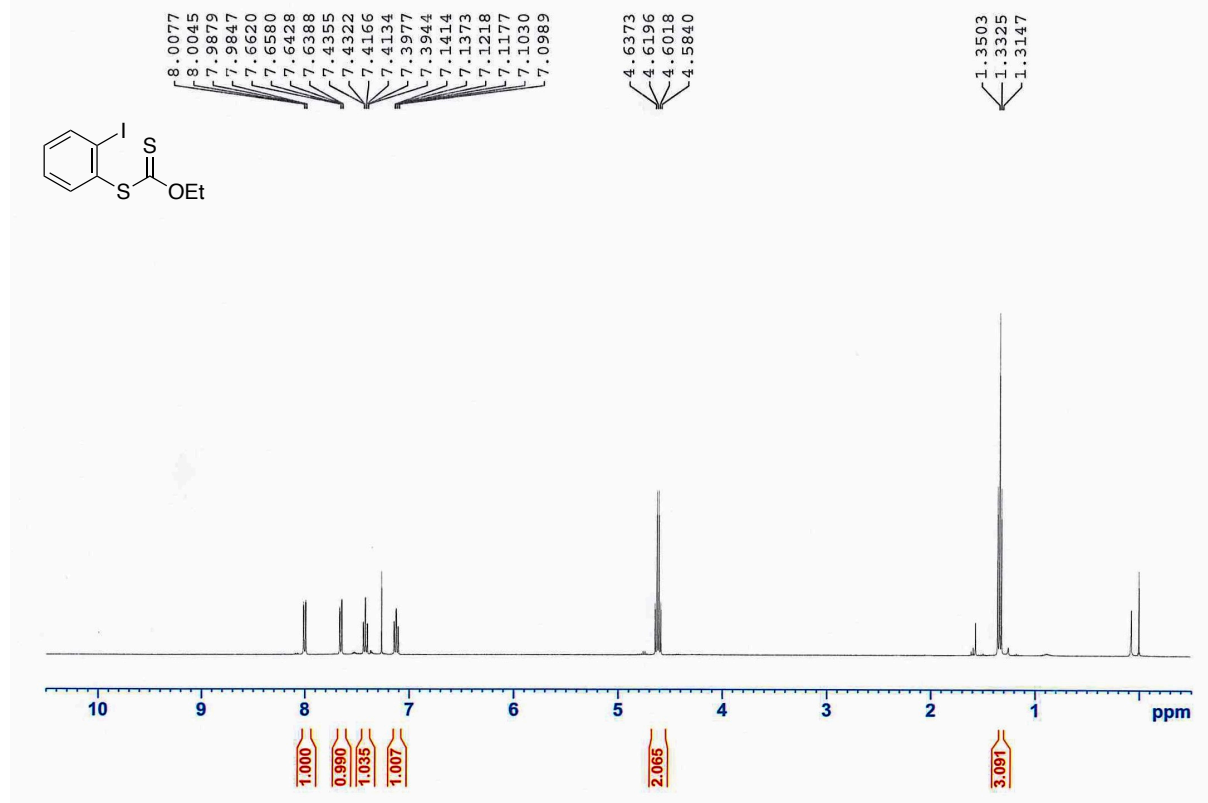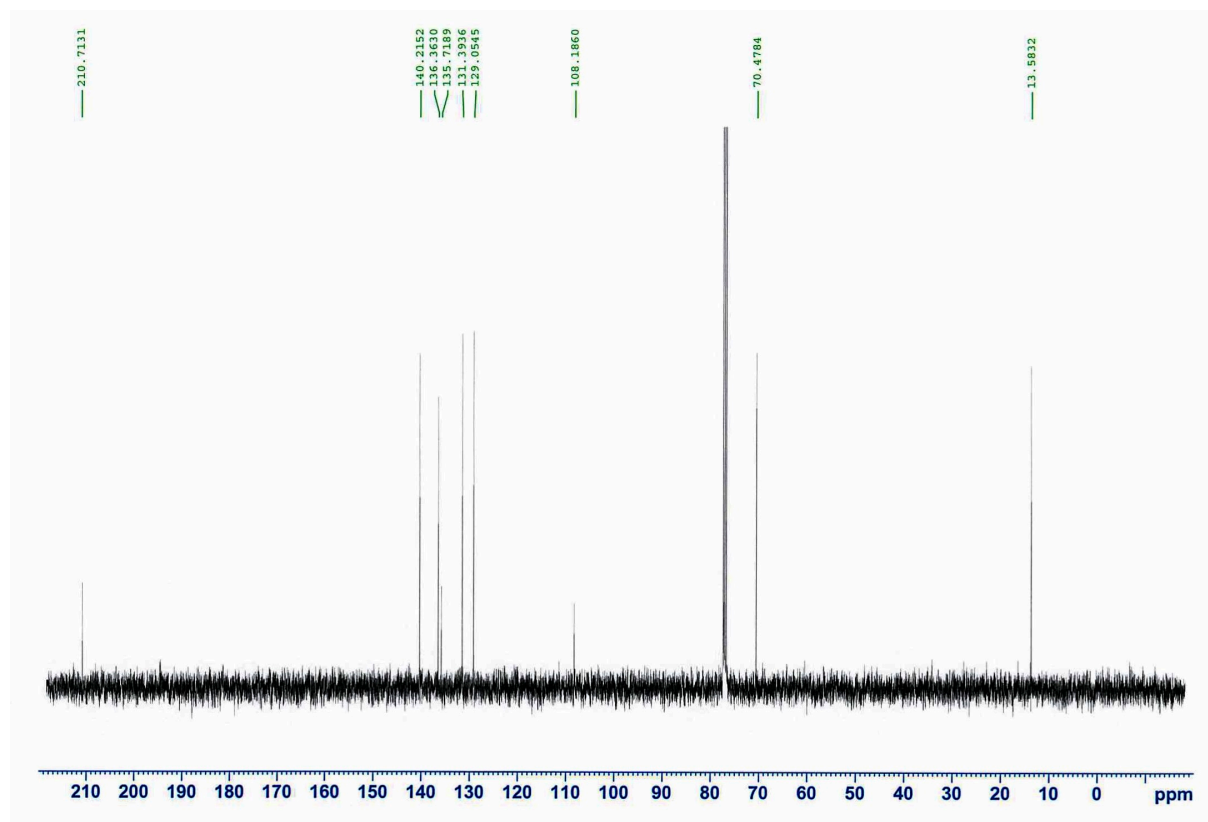

$^1\text{H}$  NMR (400 MHz) and  $^{13}\text{C}$  NMR (101 MHz) spectra of *O*-ethyl *S*-(6-iodobenzo[*d*][1,3]dioxol-5-yl) carbonodithioate (**8e**) ( $\text{CDCl}_3$ )

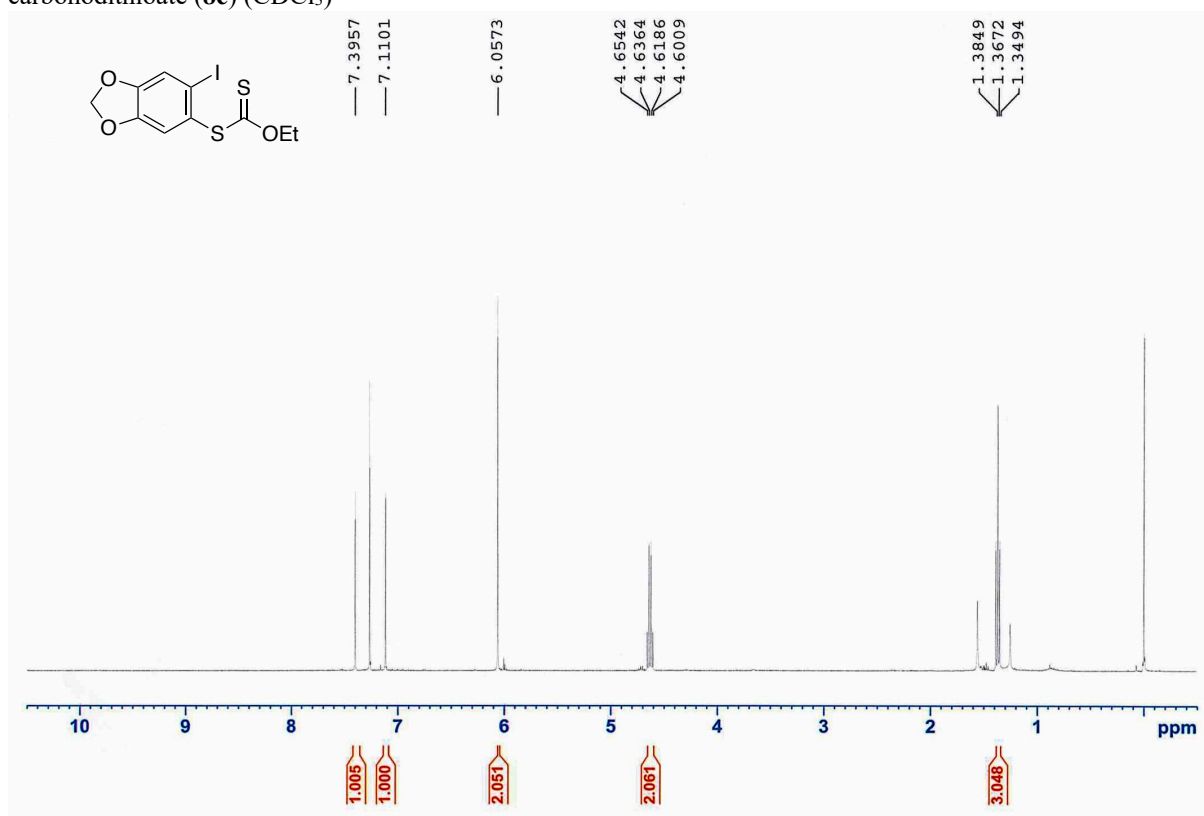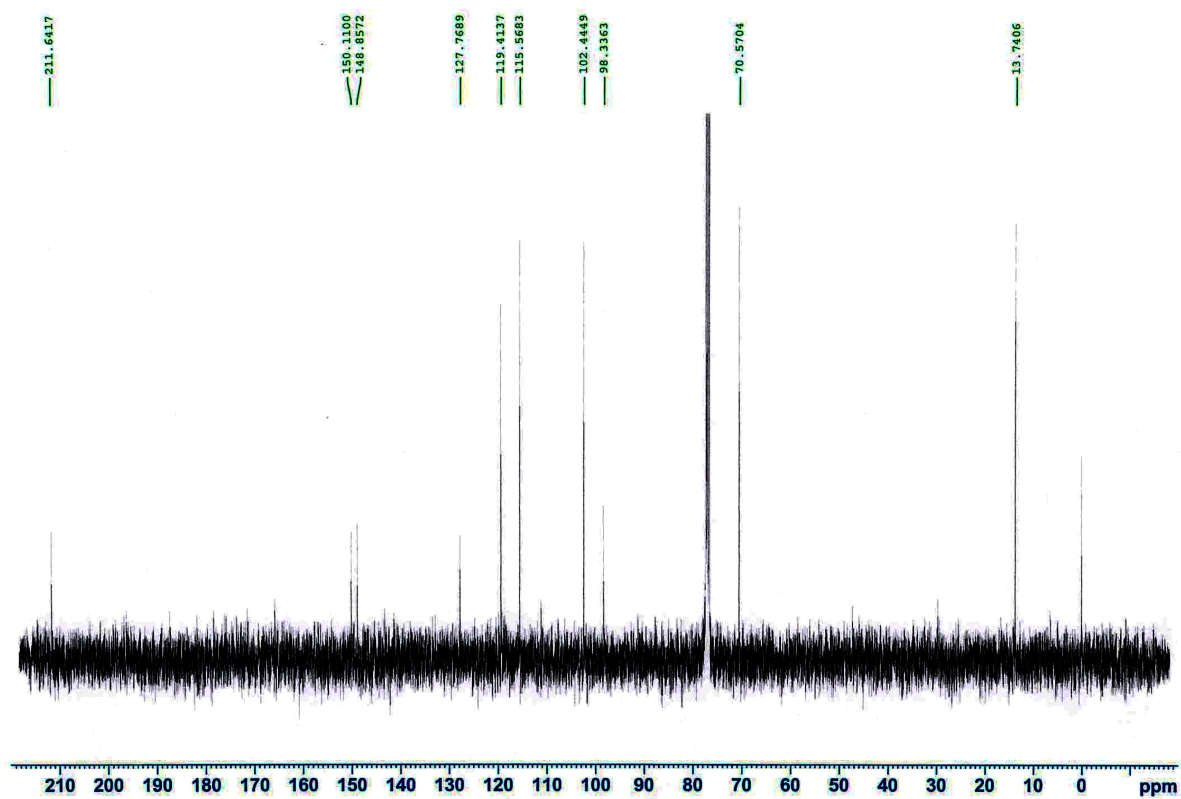

$^1\text{H}$  NMR (400 MHz) and  $^{13}\text{C}$  NMR (101 MHz) spectra of *O*-ethyl *S*-(2-iodo-3-methoxyphenyl) carbonodithioate (**8f**) ( $\text{CDCl}_3$ )

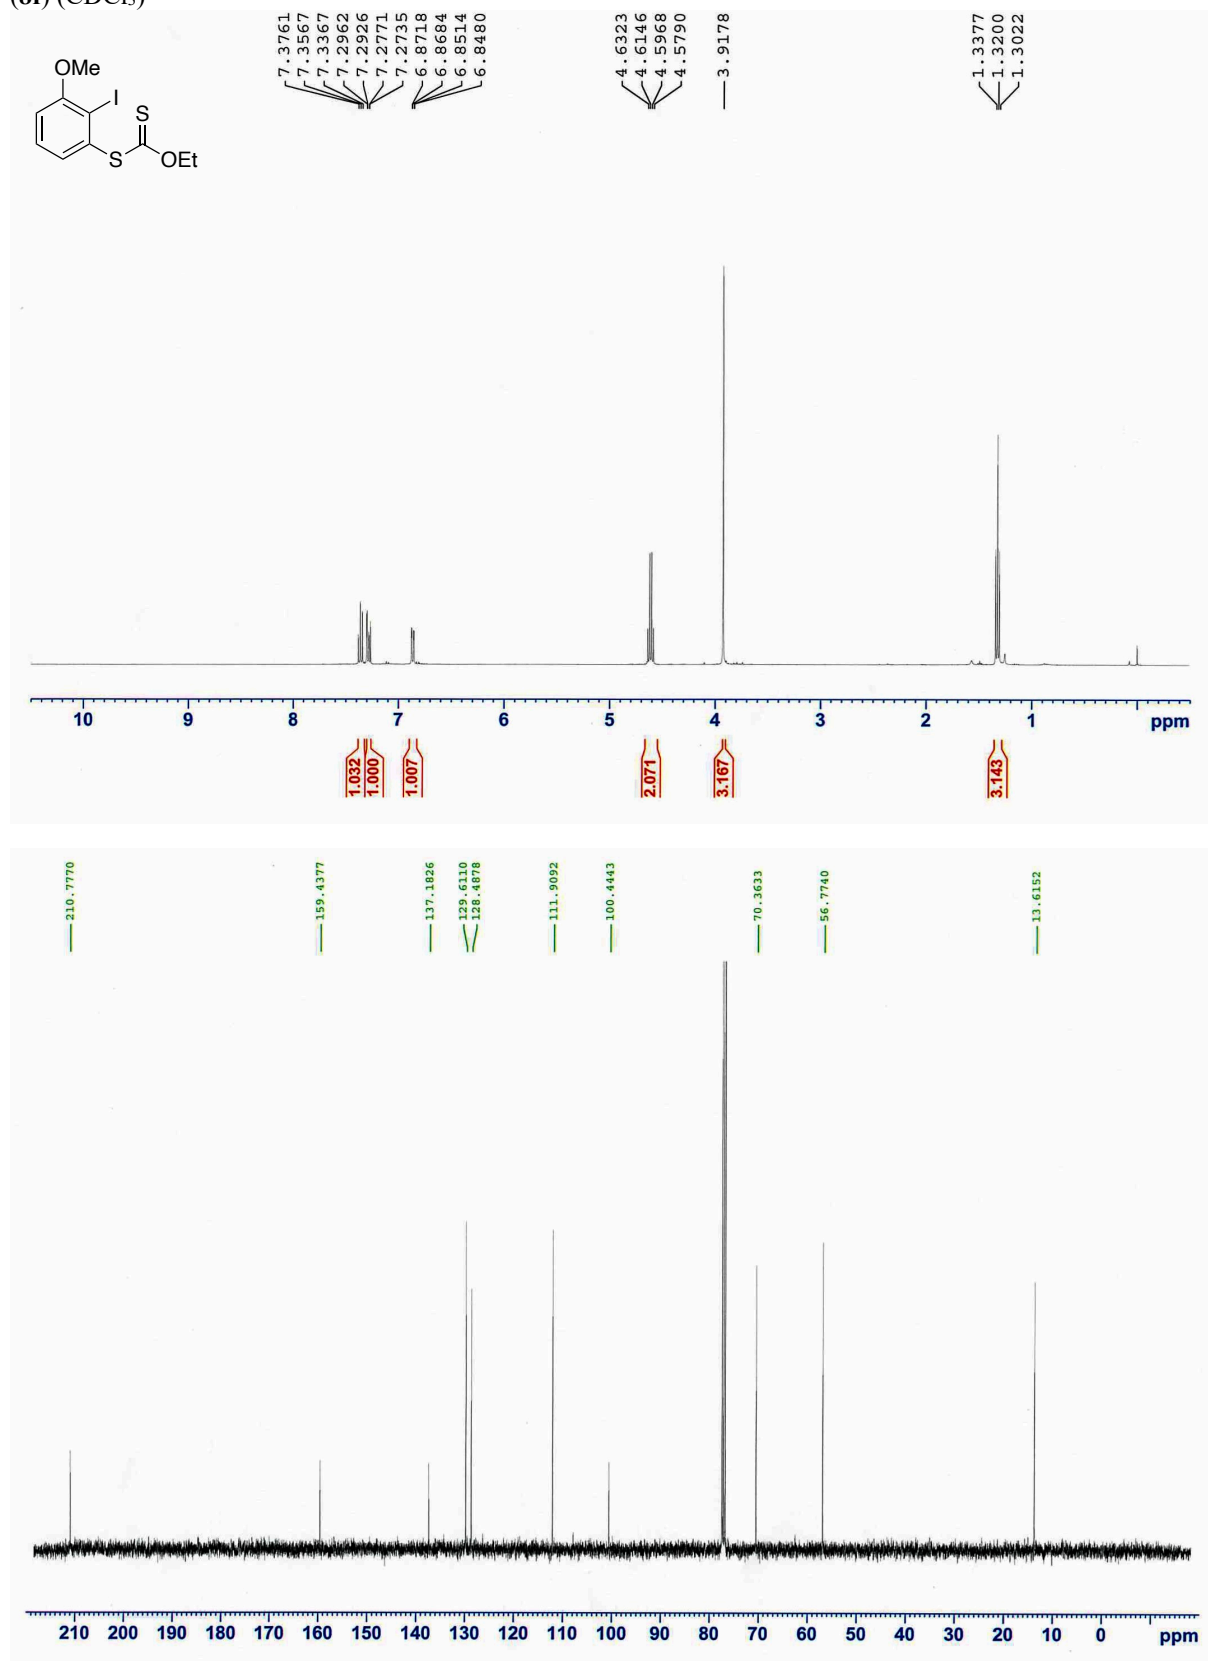

$^1\text{H}$  NMR (400 MHz) and  $^{13}\text{C}$  NMR (101 MHz) spectra of *O*-ethyl *S*-(2-iodo-3-((4-methoxyphenyl)thio)phenyl)carbonodithioate (**8g**) ( $\text{CDCl}_3$ )

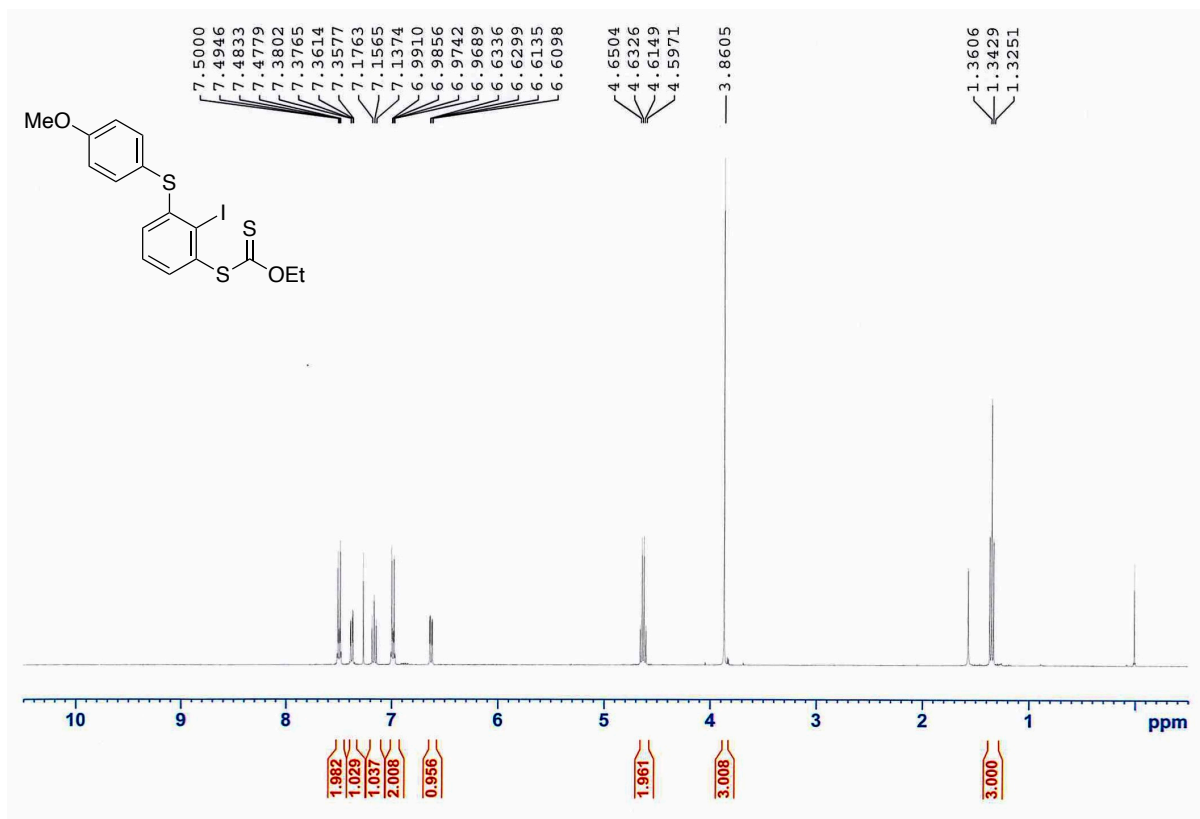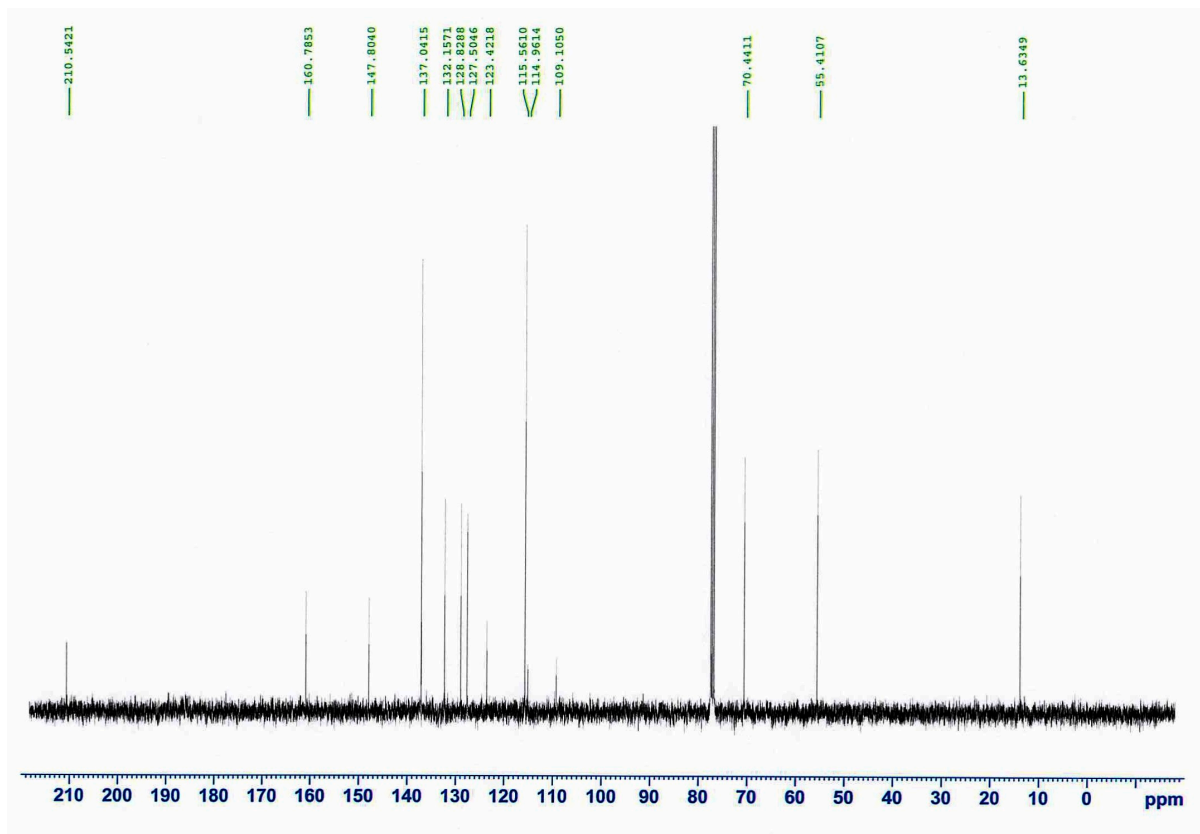

$^1\text{H}$  NMR (400 MHz) and  $^{13}\text{C}$  NMR (101 MHz) spectra of *S*-(3,4-dimethylphenyl) 4-methylbenzenesulfonylthioate (**3a**) ( $\text{CDCl}_3$ )

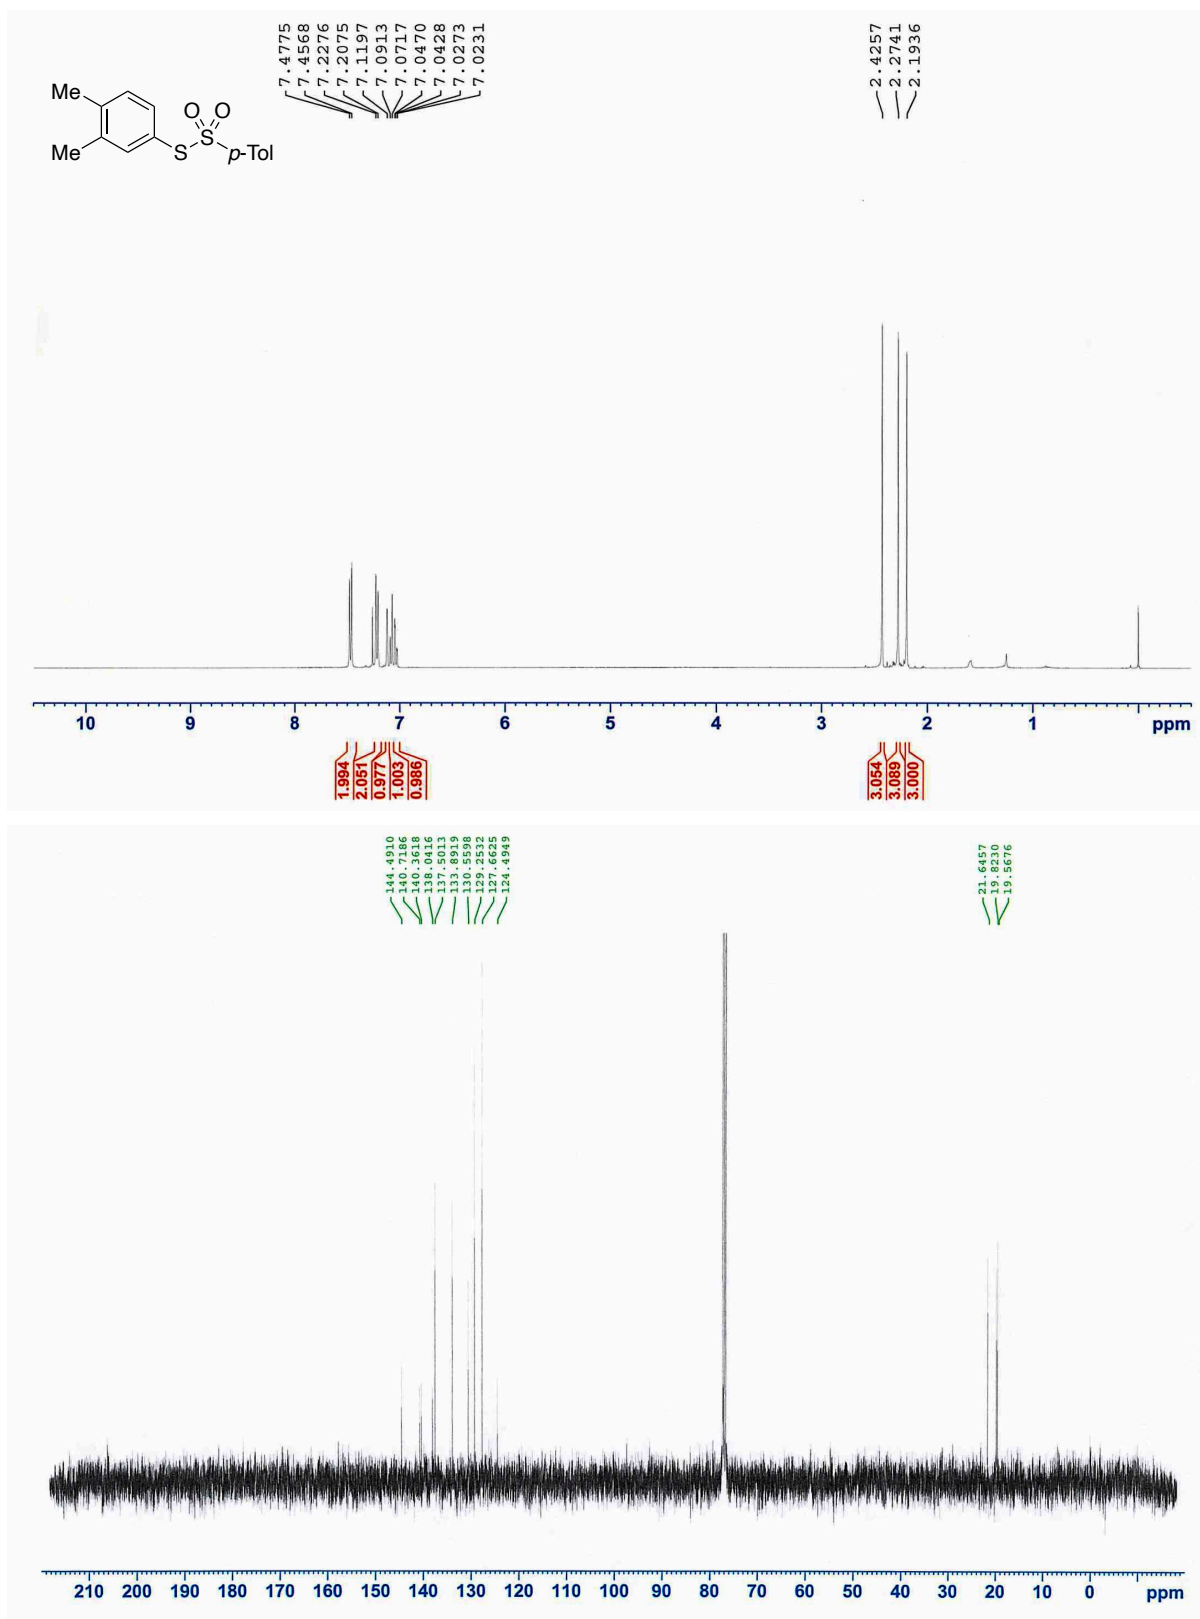

$^1\text{H}$  NMR (400 MHz) and  $^{13}\text{C}$  NMR (101 MHz) spectra of *S*-(3,4-difluorophenyl) 4-methylbenzenesulfonylthioate (**3c**) ( $\text{CDCl}_3$ )

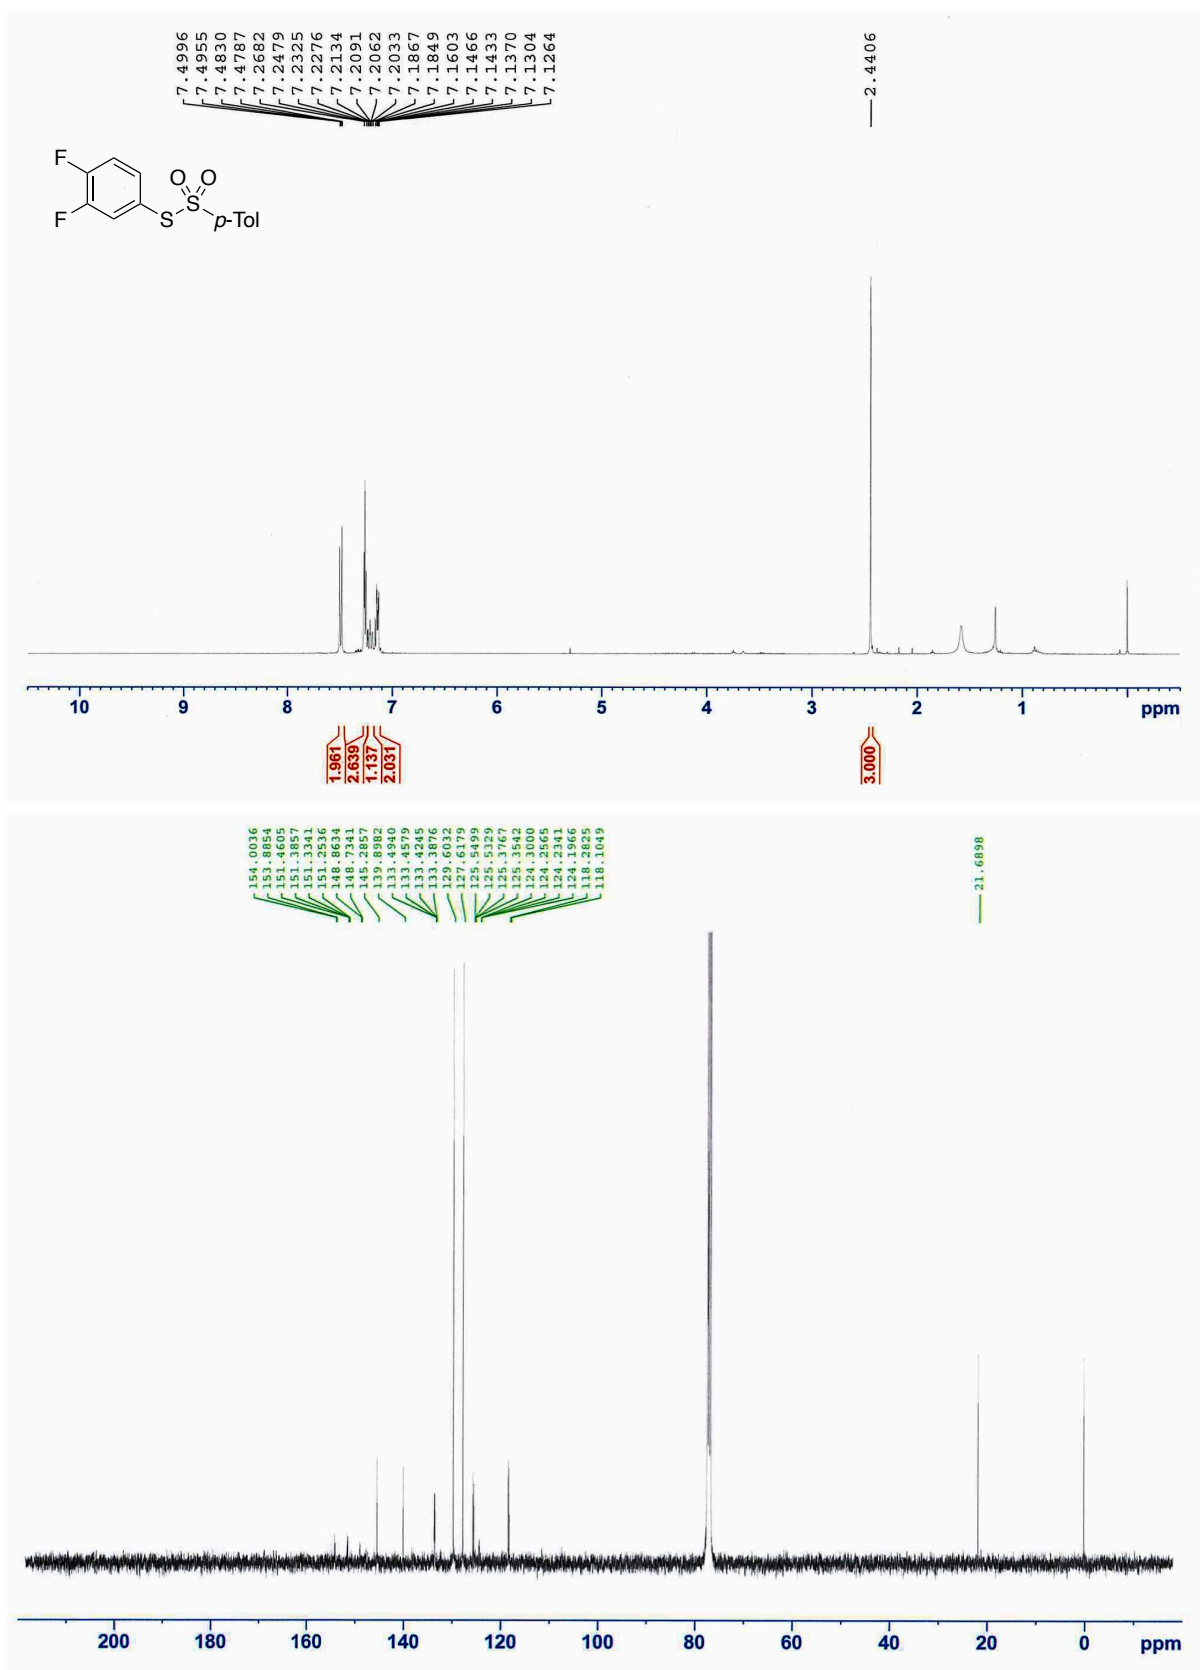

$^1\text{H}$  NMR (400 MHz) and  $^{13}\text{C}$  NMR (101 MHz) spectra of *S*-(3,4-dimethoxyphenyl) 4-methylbenzenesulfonothioate (**3d**) ( $\text{CDCl}_3$ )

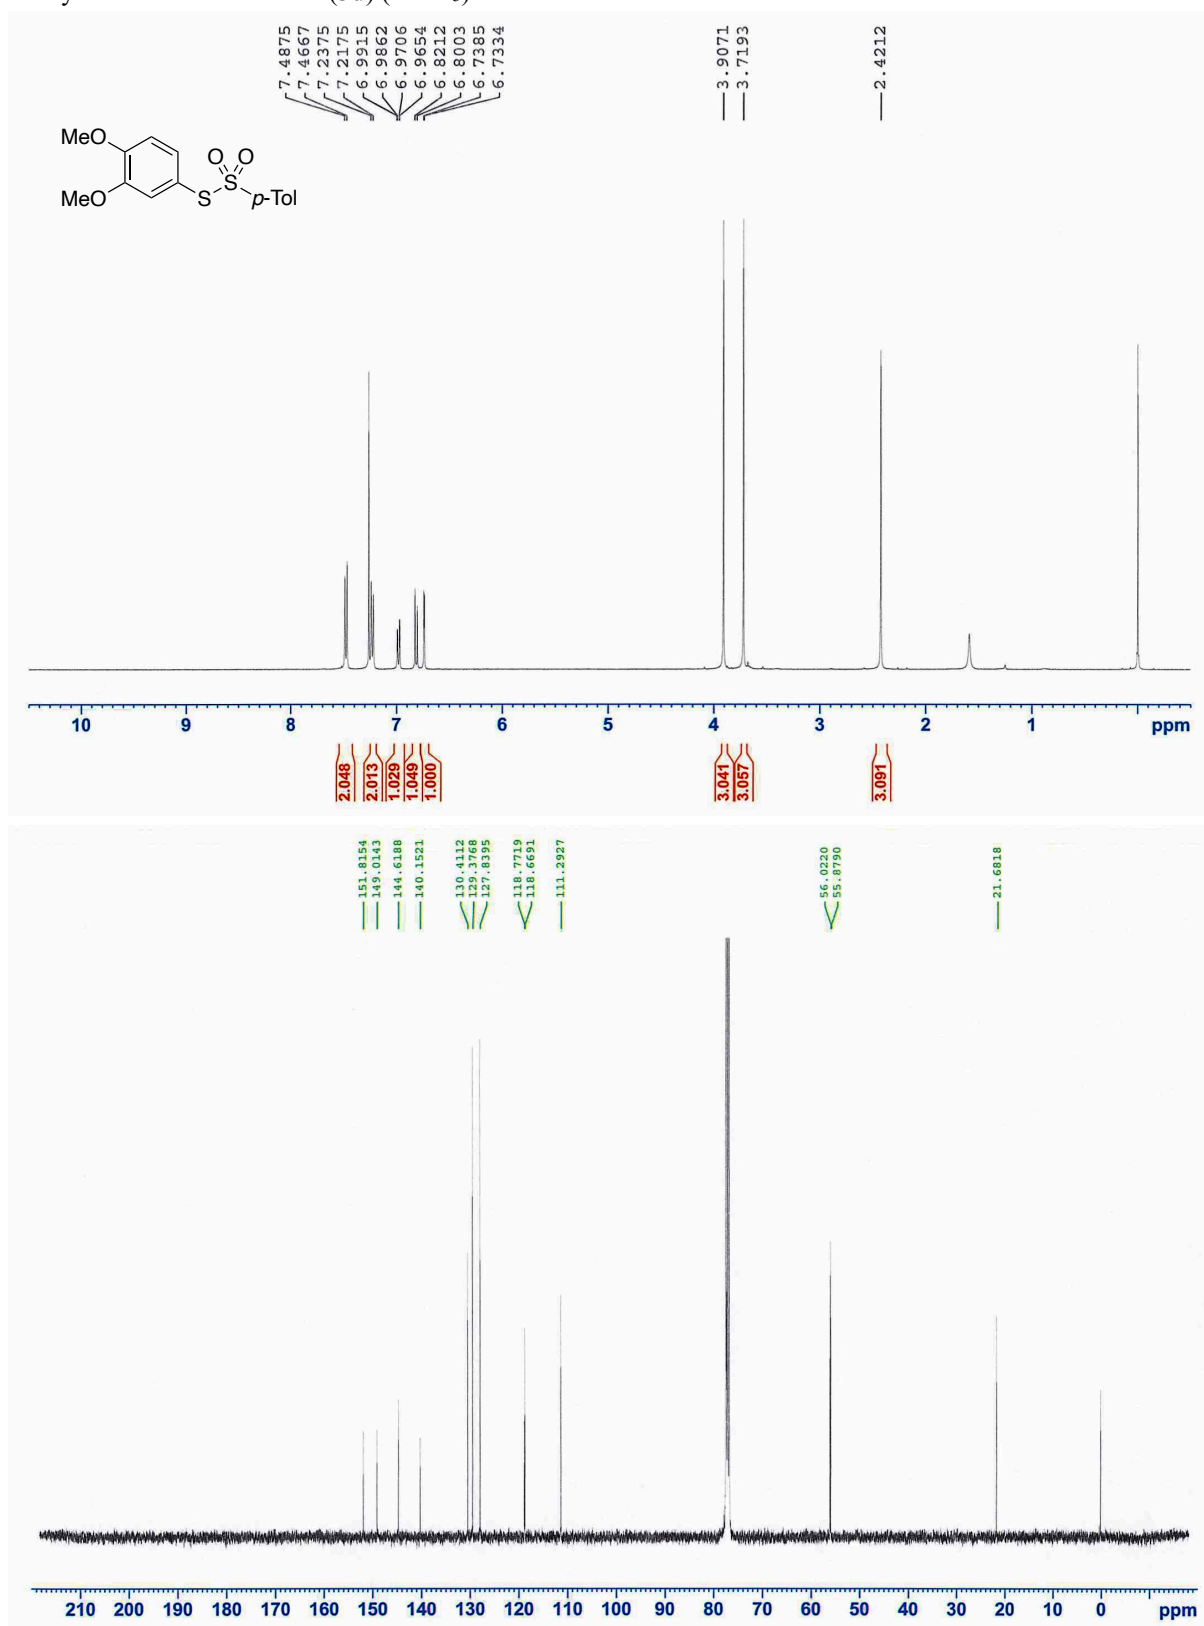

$^1\text{H}$  NMR (400 MHz) and  $^{13}\text{C}$  NMR (101 MHz) spectra of *S*-(3-((4-methoxyphenyl)thio)phenyl) 4-methylbenzenesulfonothioate (**3g**) ( $\text{CDCl}_3$ )

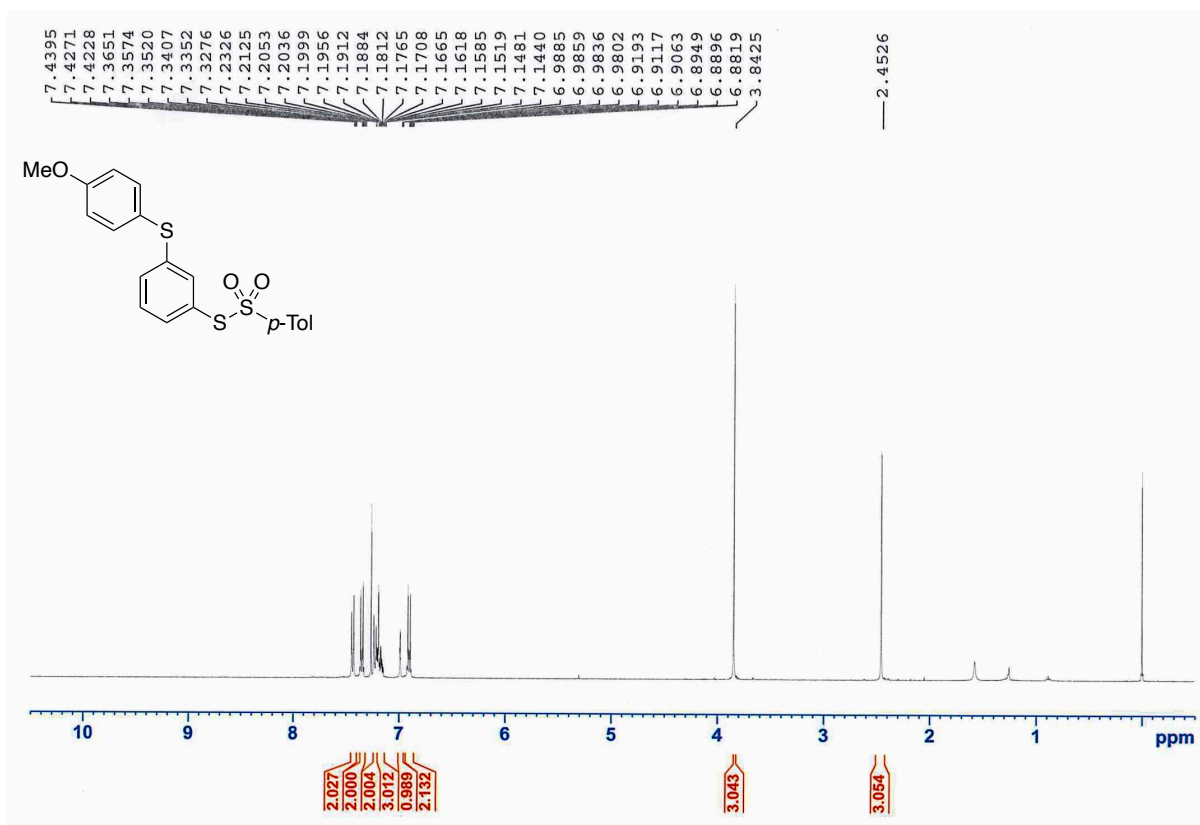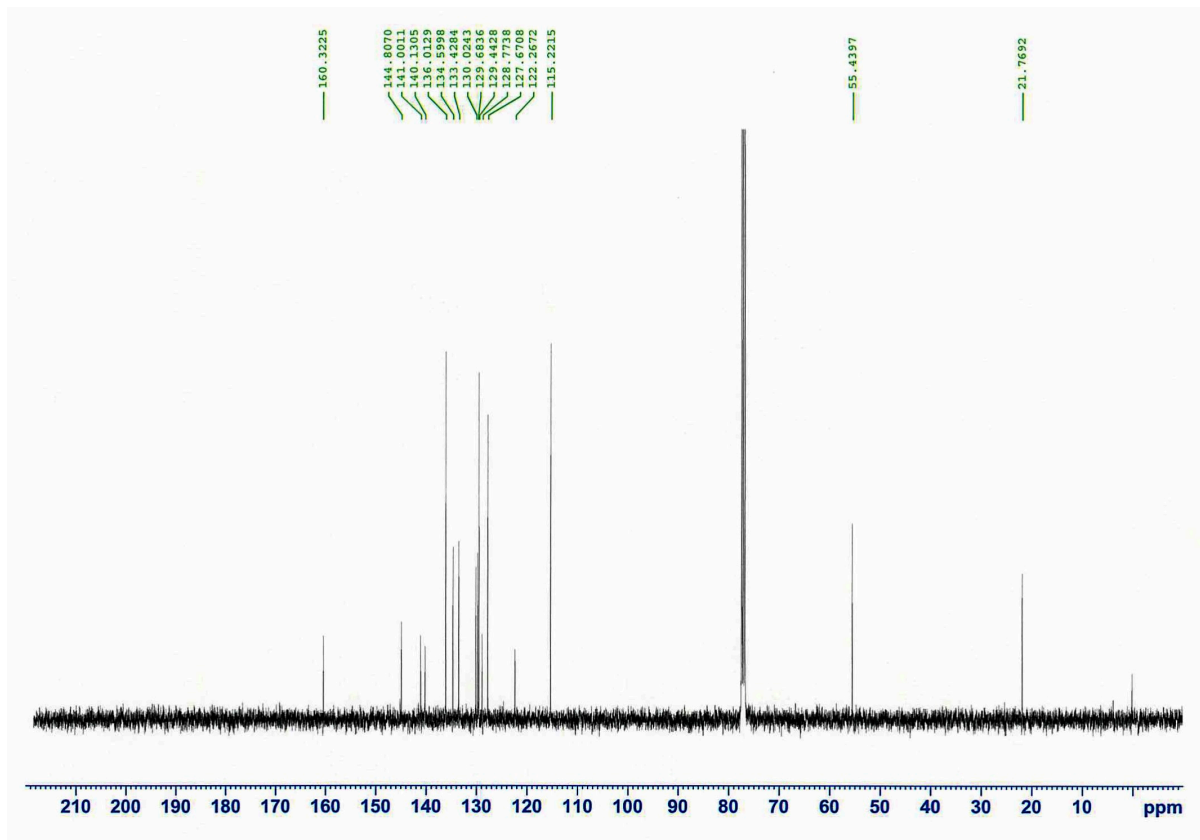

$^1\text{H}$  NMR (400 MHz) and  $^{13}\text{C}$  NMR (101 MHz) spectra of methyl 1-(3-methoxy-5-(tosylthio)phenyl)-1*H*-1,2,3-triazole-4-carboxylate (**3j**) ( $\text{CDCl}_3$ )

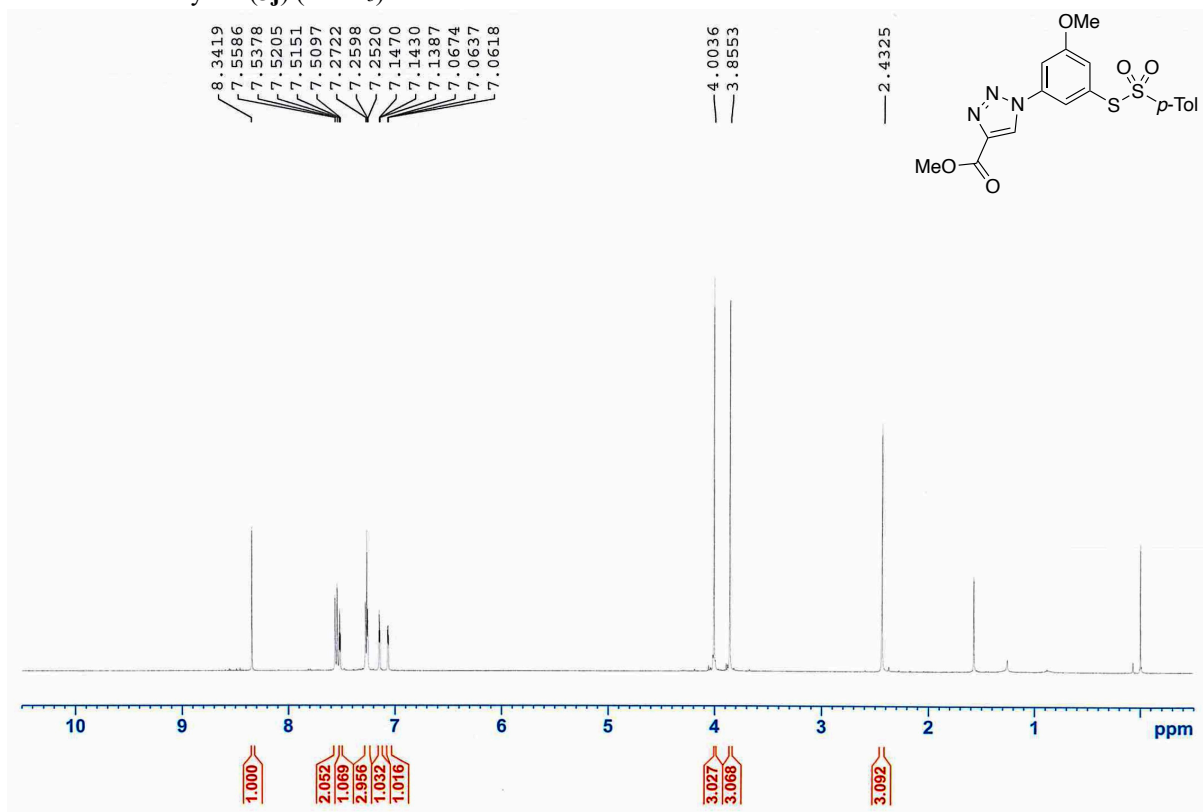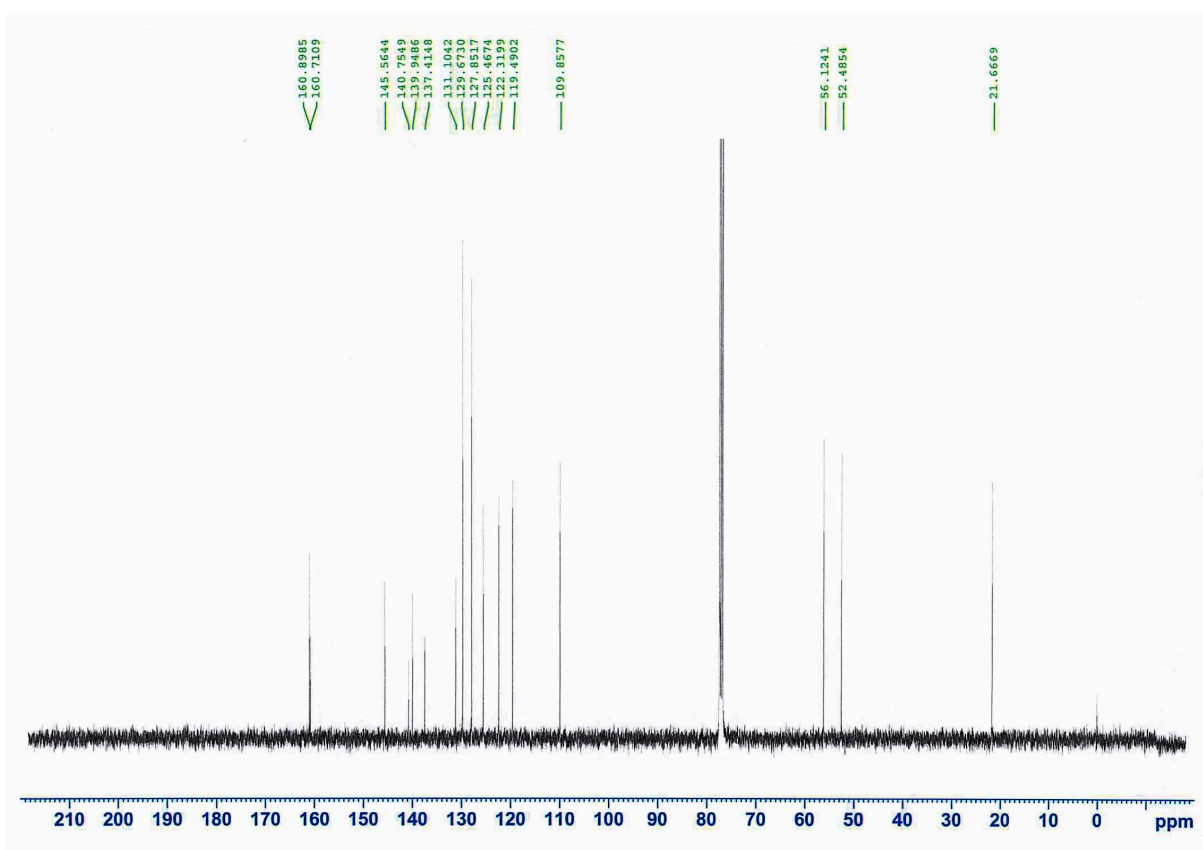

$^1\text{H}$  NMR (400 MHz) and  $^{13}\text{C}$  NMR (101 MHz) spectra of *S*-(2-bromo-4,5-dimethylphenyl) 4-methylbenzenesulfonothioate (**5a**) ( $\text{CDCl}_3$ )

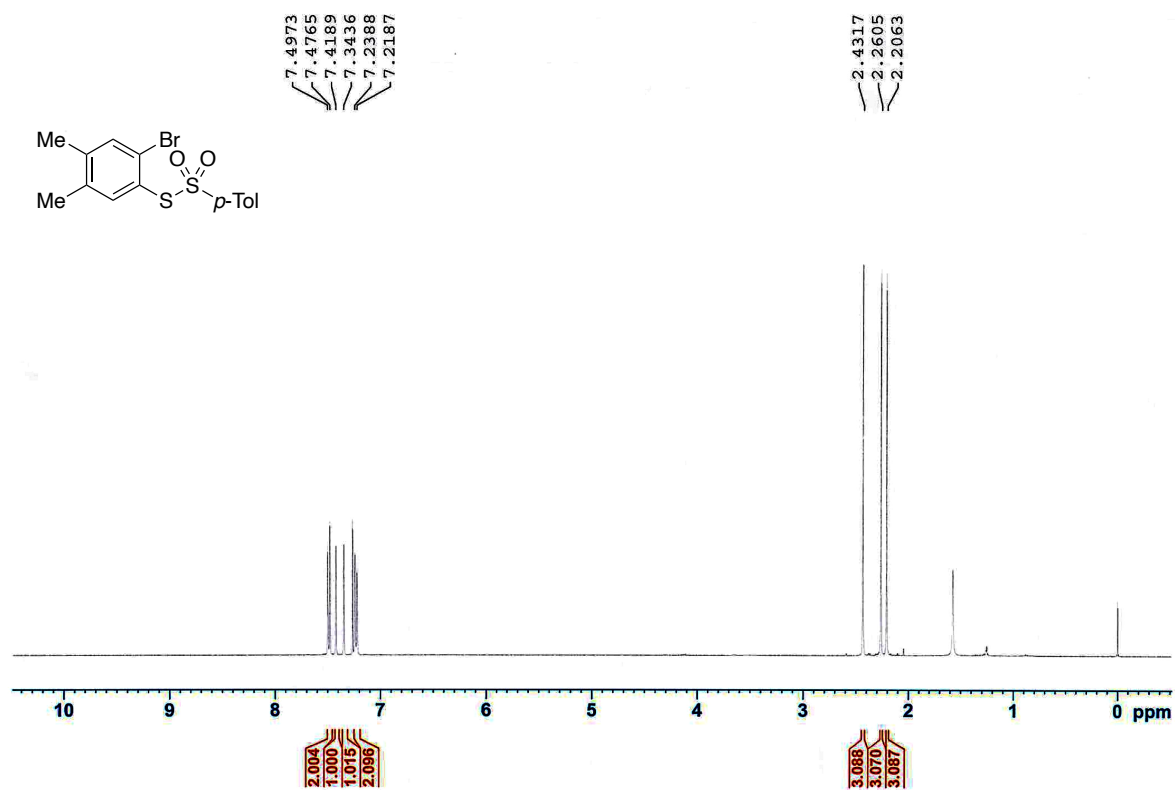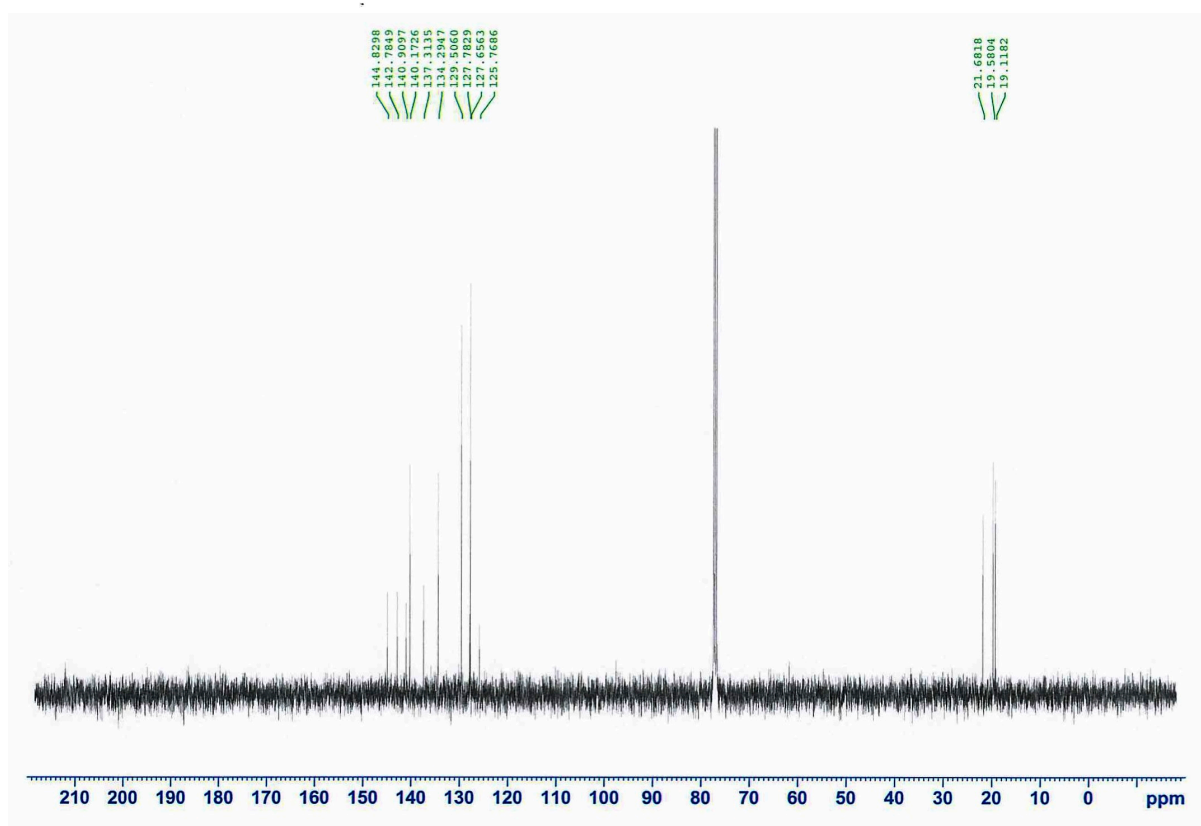

$^1\text{H}$  NMR (400 MHz) and  $^{13}\text{C}$  NMR (101 MHz) spectra of *S*-(2-bromo-4,5-difluorophenyl) 4-methylbenzenesulfonothioate (**5c**) ( $\text{CDCl}_3$ )

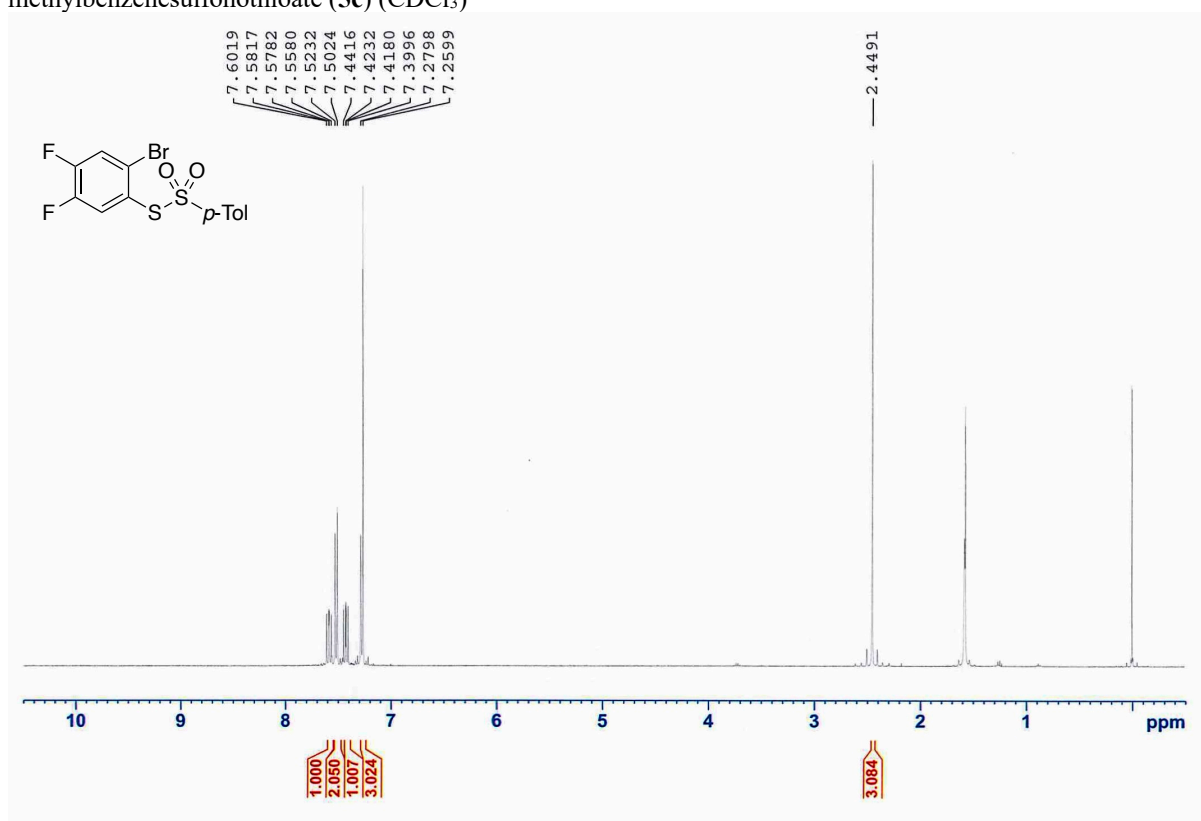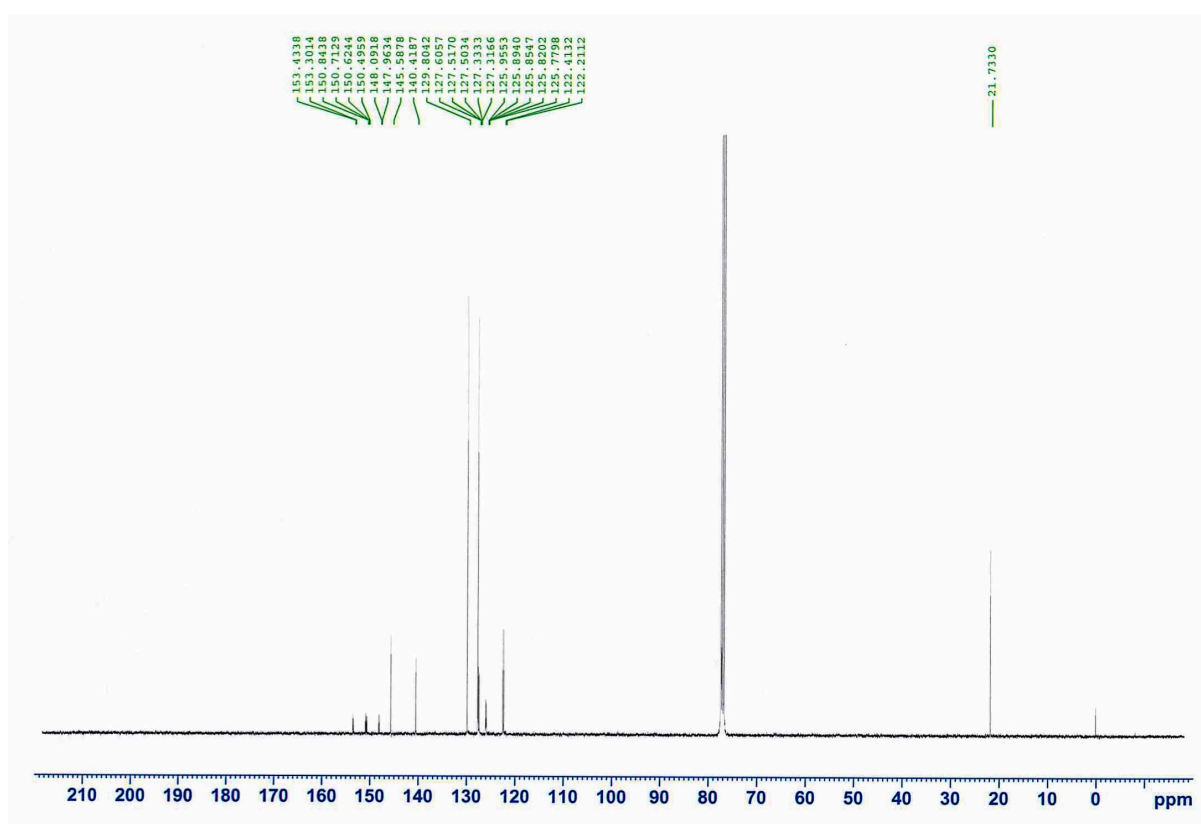

$^1\text{H}$  NMR (400 MHz) and  $^{13}\text{C}$  NMR (101 MHz) spectra of *S*-(2-bromo-3-methoxyphenyl) 4-methylbenzenesulfonothioate (**5f**) ( $\text{CDCl}_3$ )

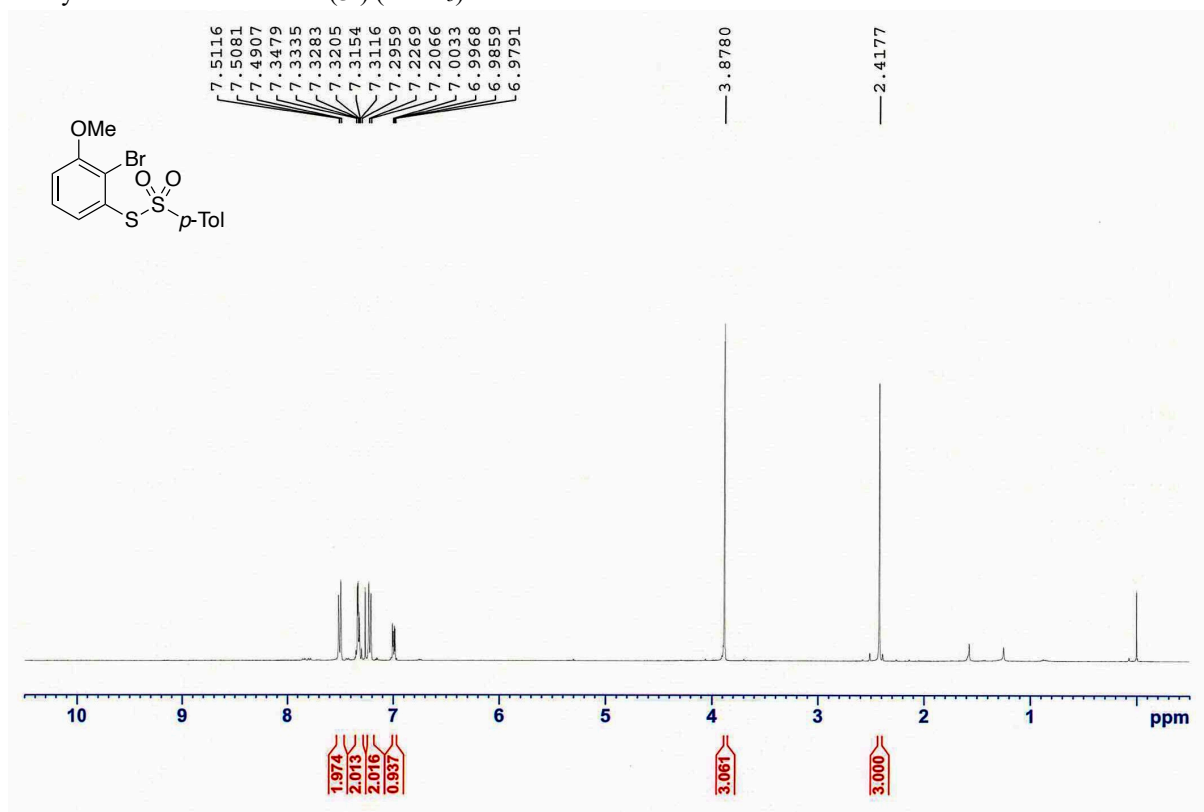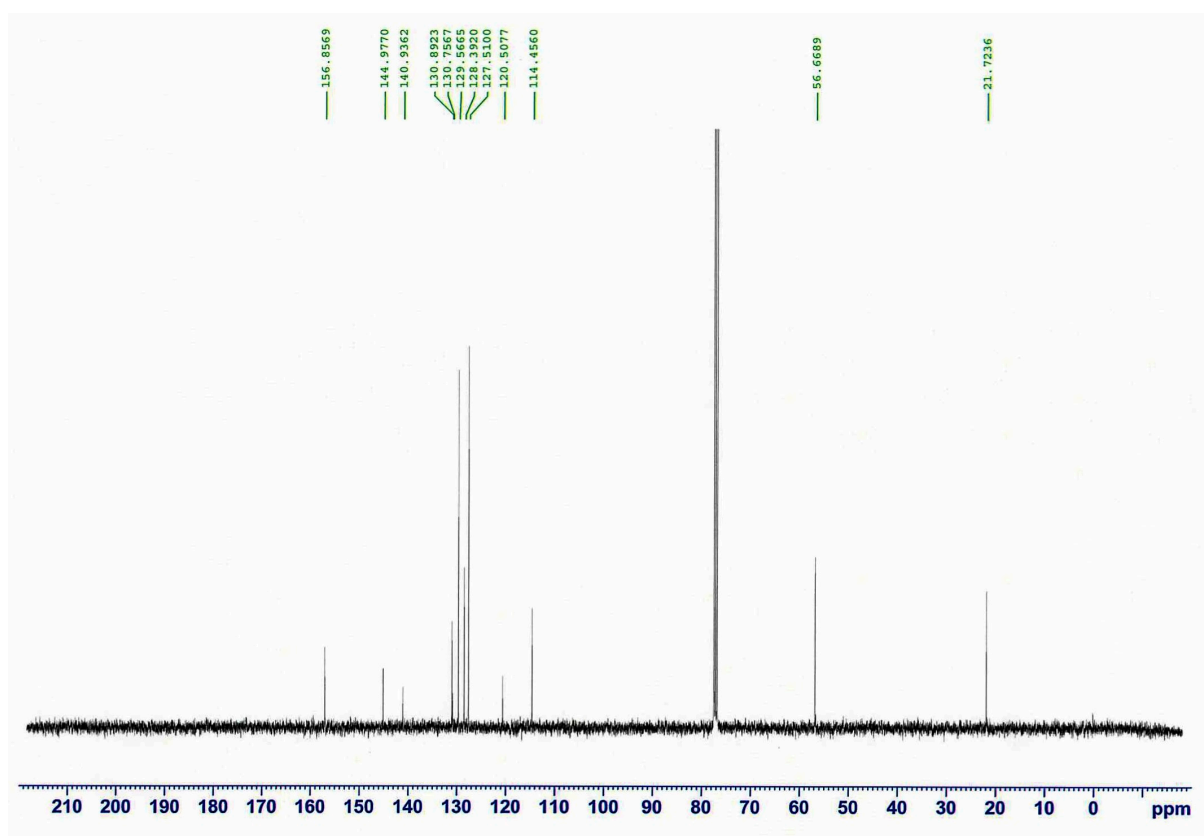

$^1\text{H}$  NMR (400 MHz) and  $^{13}\text{C}$  NMR (101 MHz) spectra of *S*-(2-chloro-4,5-dimethylphenyl) 4-methylbenzenesulfonothioate (**9a**) ( $\text{CDCl}_3$ )

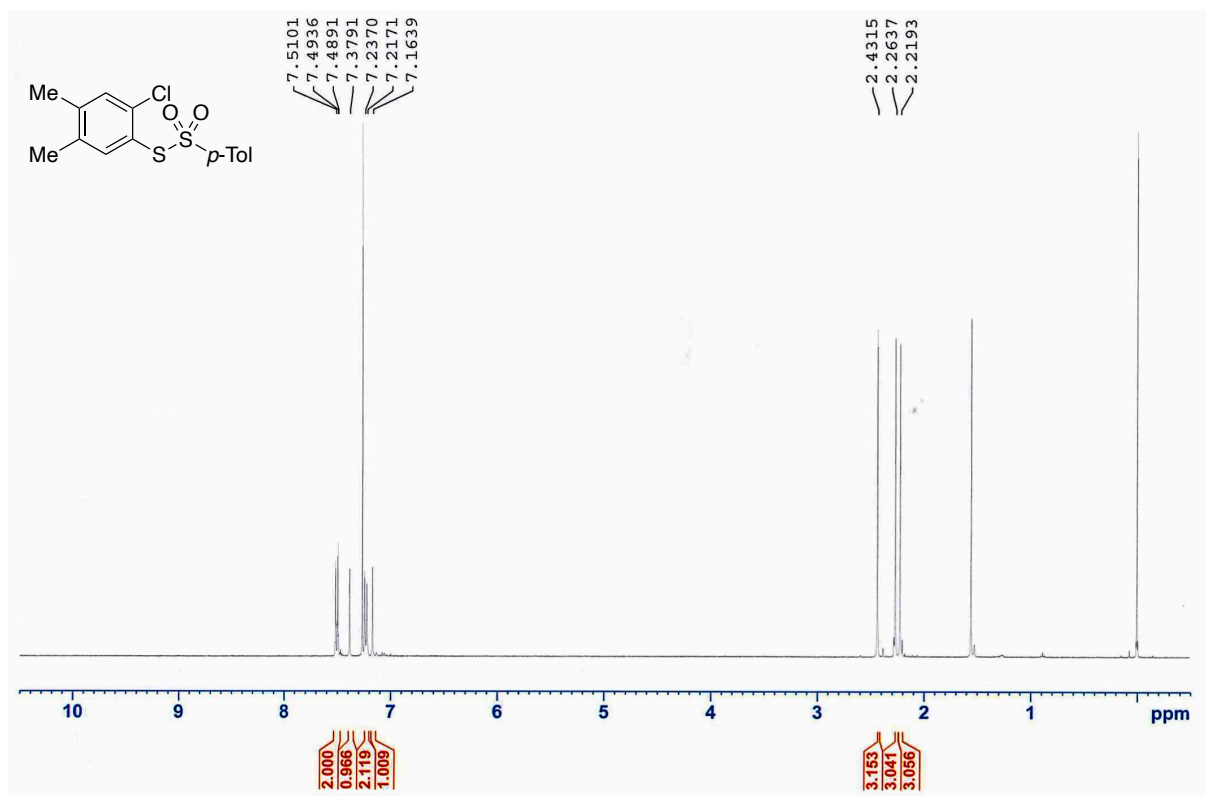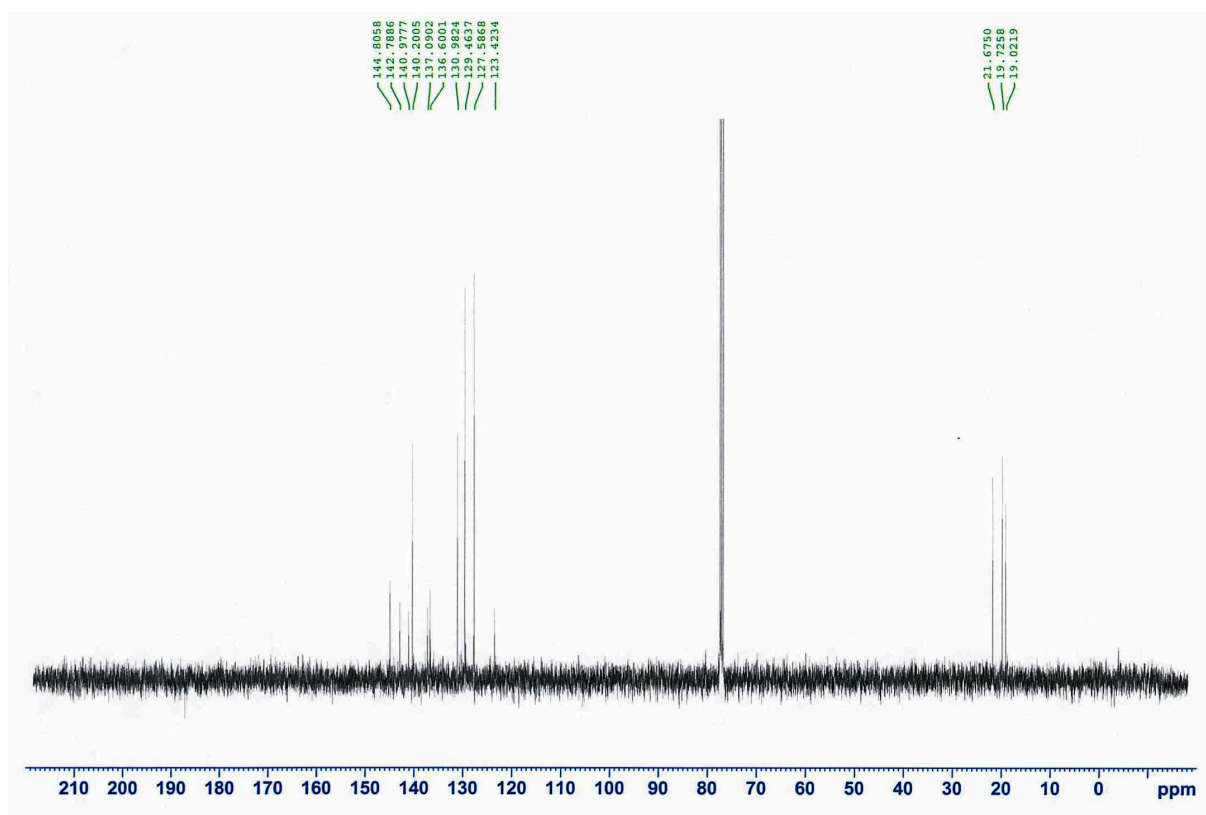

$^1\text{H}$  NMR (400 MHz) and  $^{13}\text{C}$  NMR (101 MHz) spectra of *S*-(2-iodo-4,5-dimethylphenyl) 4-methylbenzenesulfonothioate (**10a**) ( $\text{CDCl}_3$ )

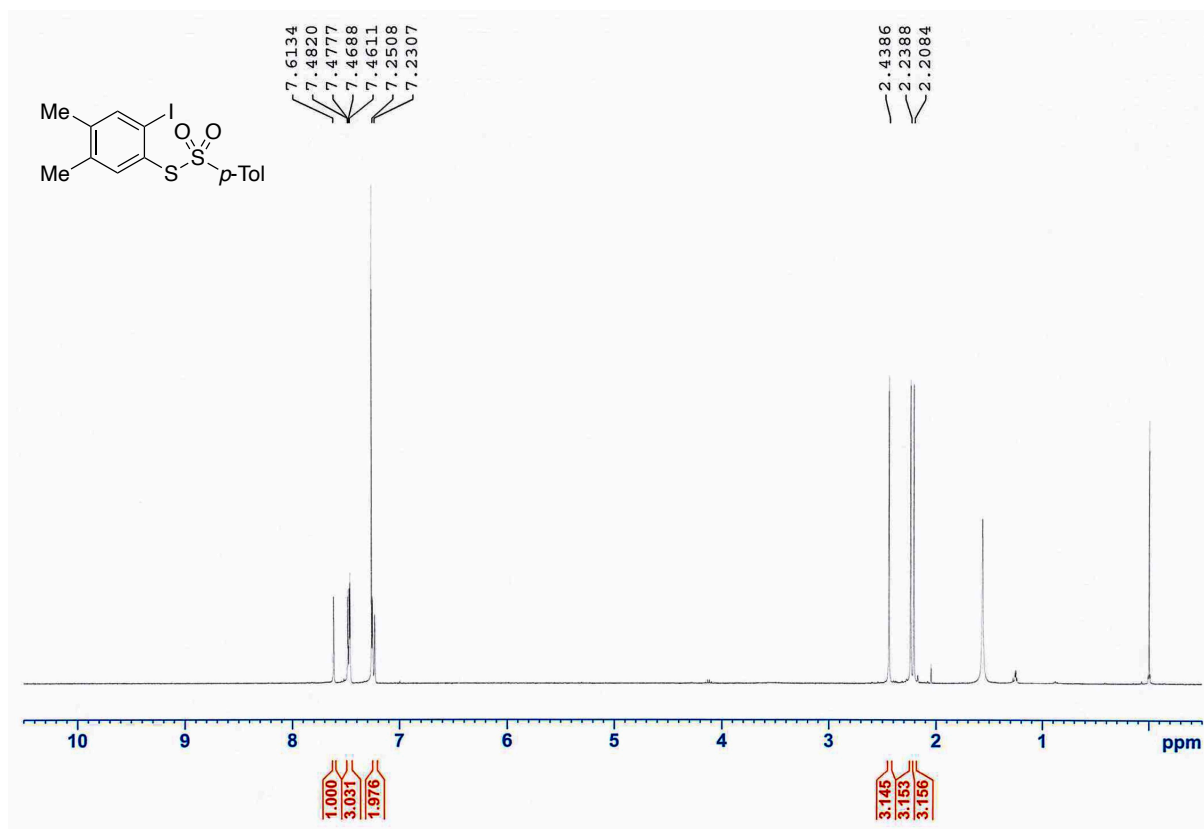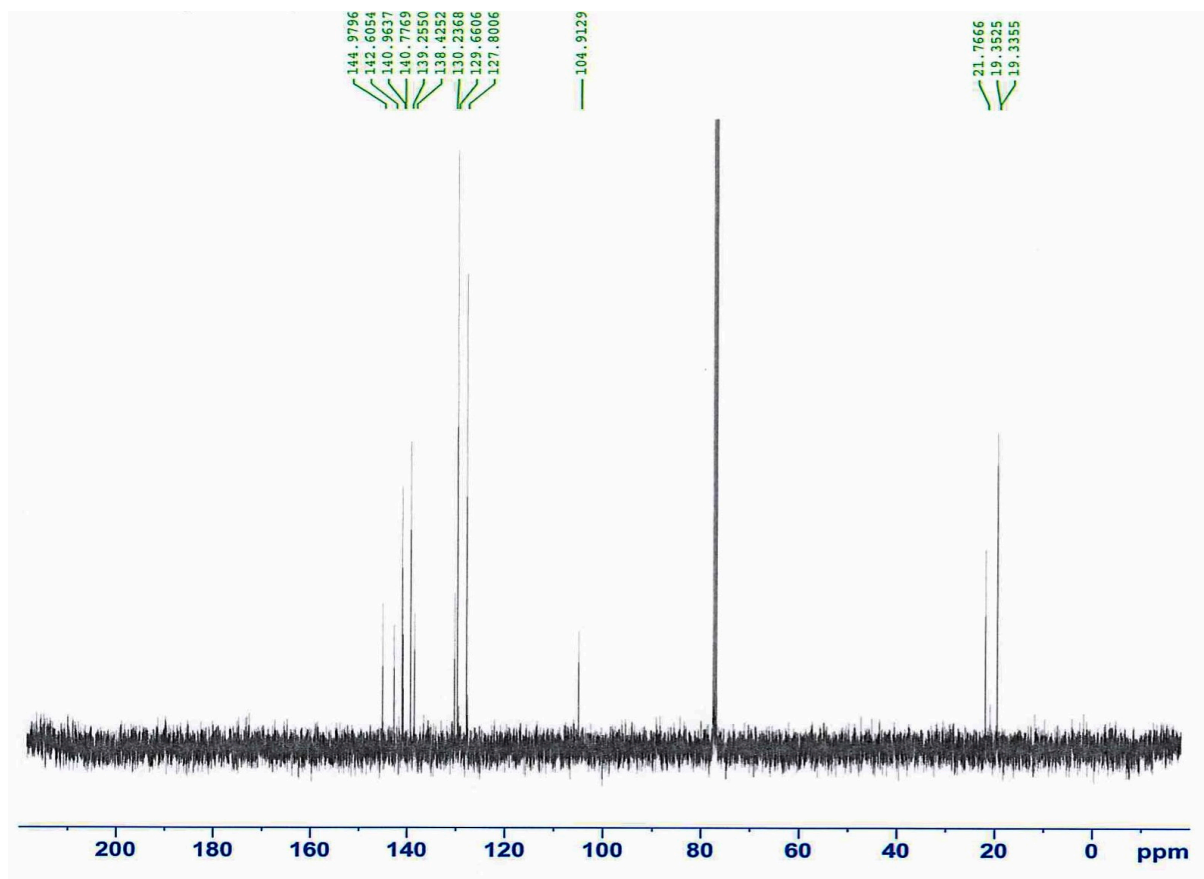

$^1\text{H}$  NMR (400 MHz) and  $^{13}\text{C}$  NMR (101 MHz) spectra of *S*-(2-iodophenyl) 4-methylbenzenesulfonylthioate (**10b**) ( $\text{CDCl}_3$ )

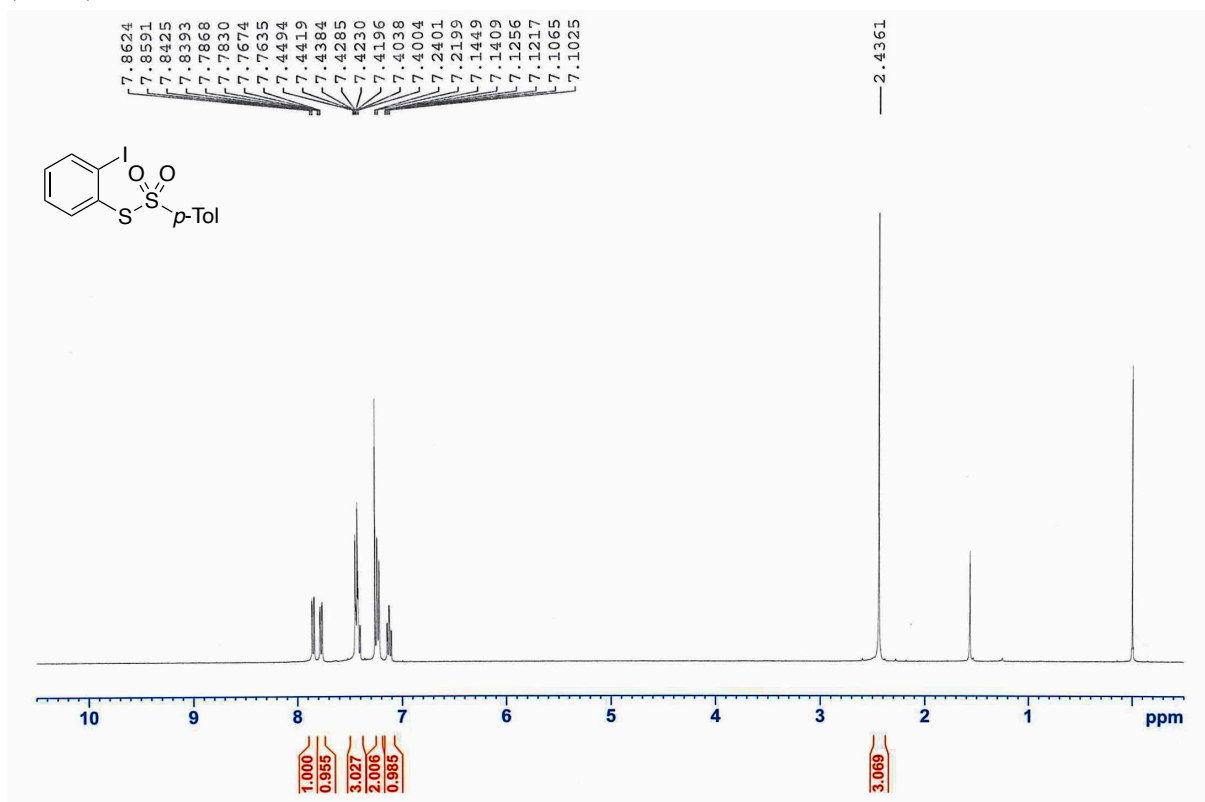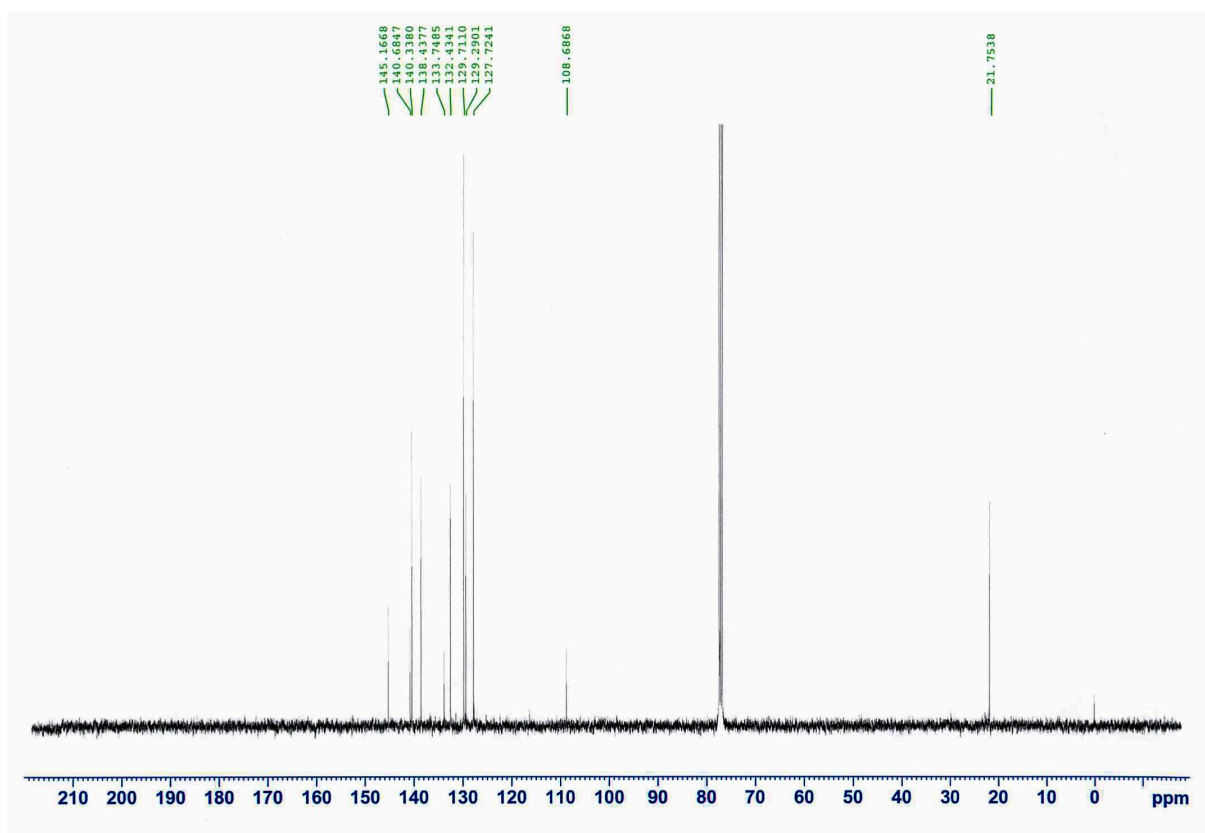

$^1\text{H}$  NMR (400 MHz) and  $^{13}\text{C}$  NMR (101 MHz) spectra of *S*-(2-iodo-4,5-dimethoxyphenyl) 4-methylbenzenesulfonothioate (**10d**) ( $\text{CDCl}_3$ )

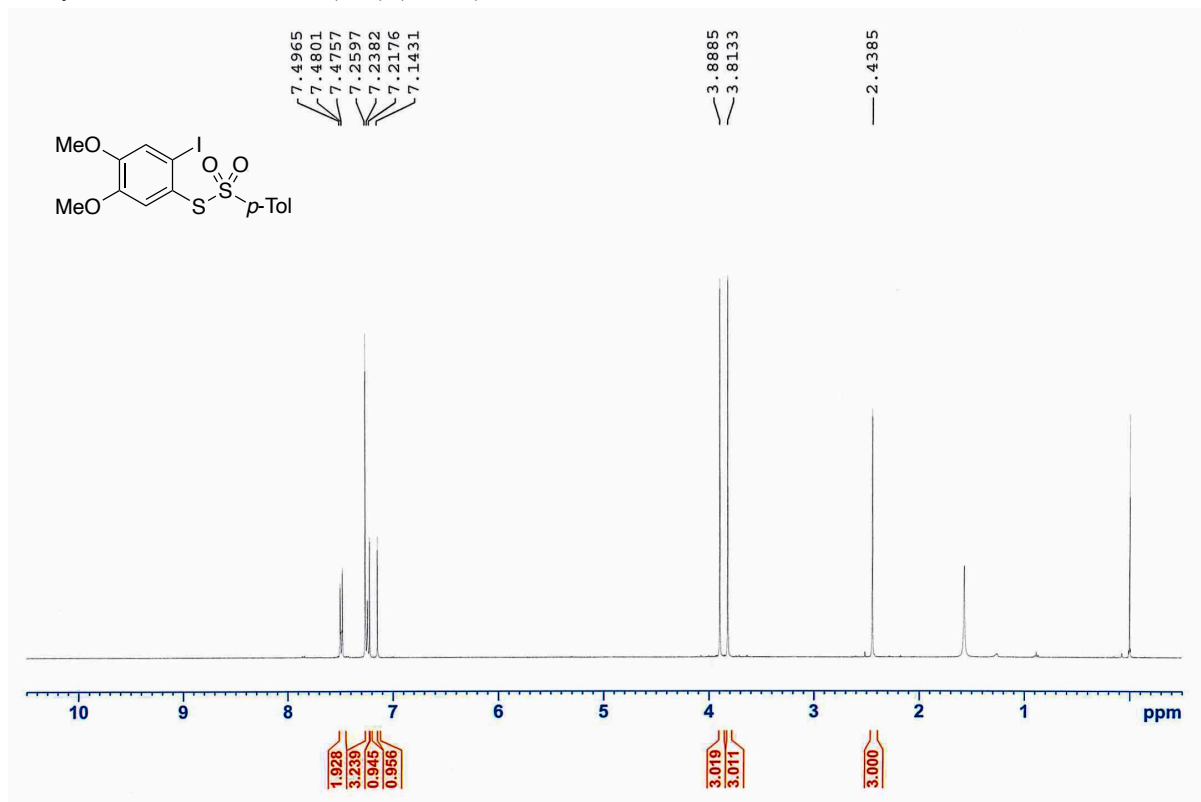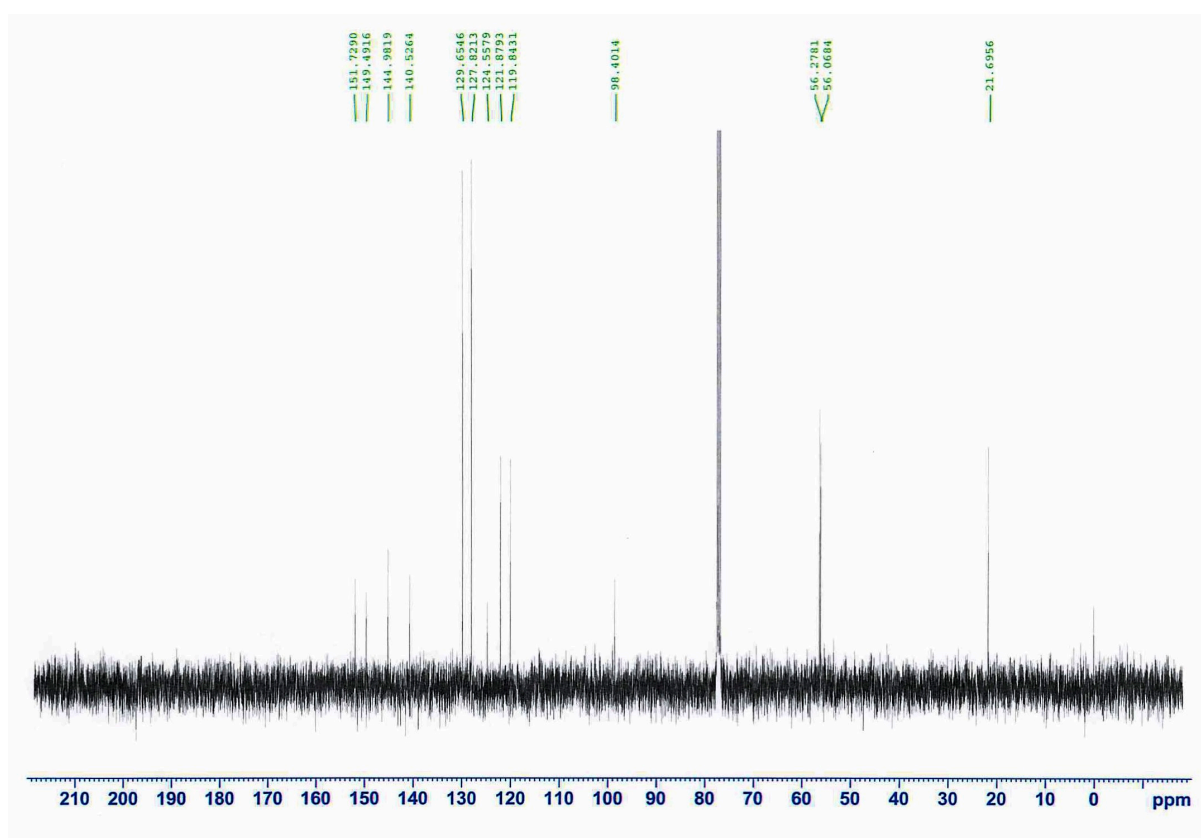

$^1\text{H}$  NMR (400 MHz) and  $^{13}\text{C}$  NMR (101 MHz) spectra of *S*-(6-iodobenzo[*d*][1,3]dioxol-5-yl) 4-methylbenzenesulfonothioate (**10e**) ( $\text{CDCl}_3$ )

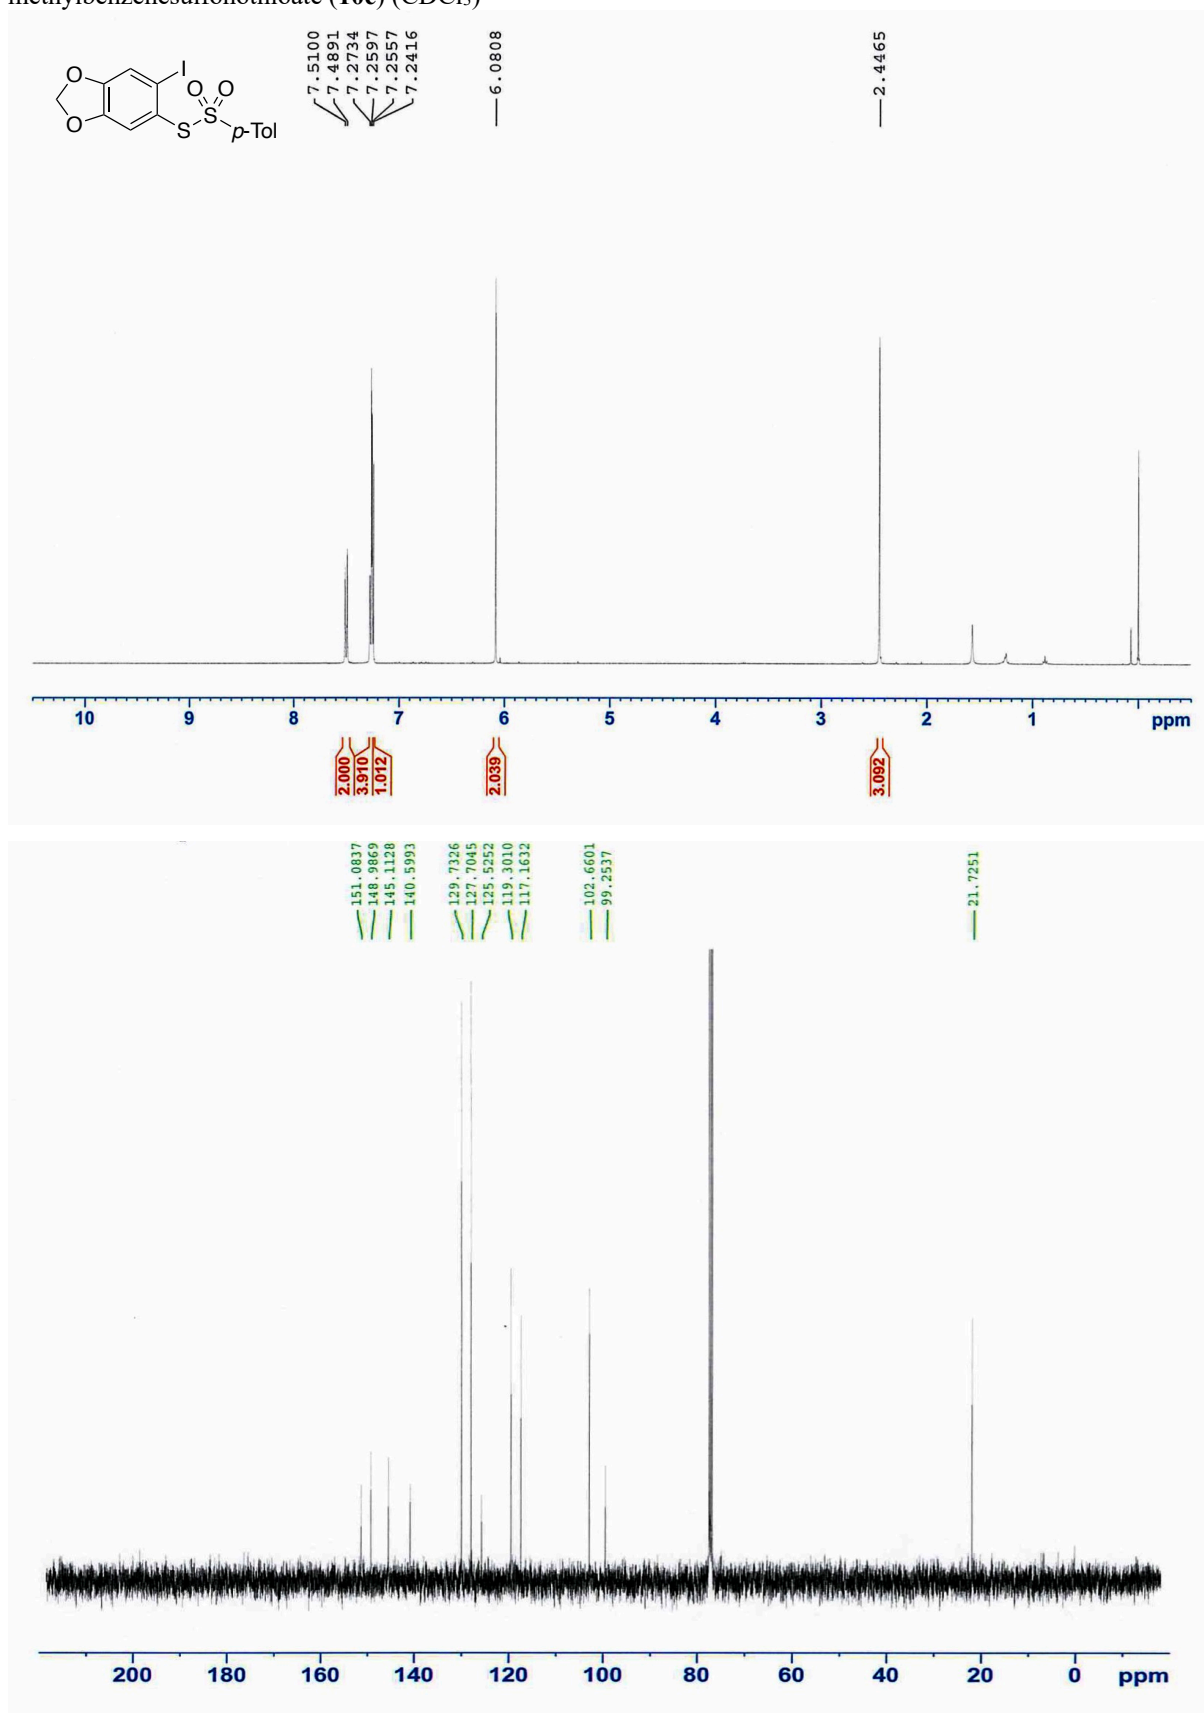

$^1\text{H}$  NMR (400 MHz) and  $^{13}\text{C}$  NMR (101 MHz) spectra of *S*-(2-iodo-3-methoxyphenyl) 4-methylbenzenesulfonothioate (**10f**) ( $\text{CDCl}_3$ )

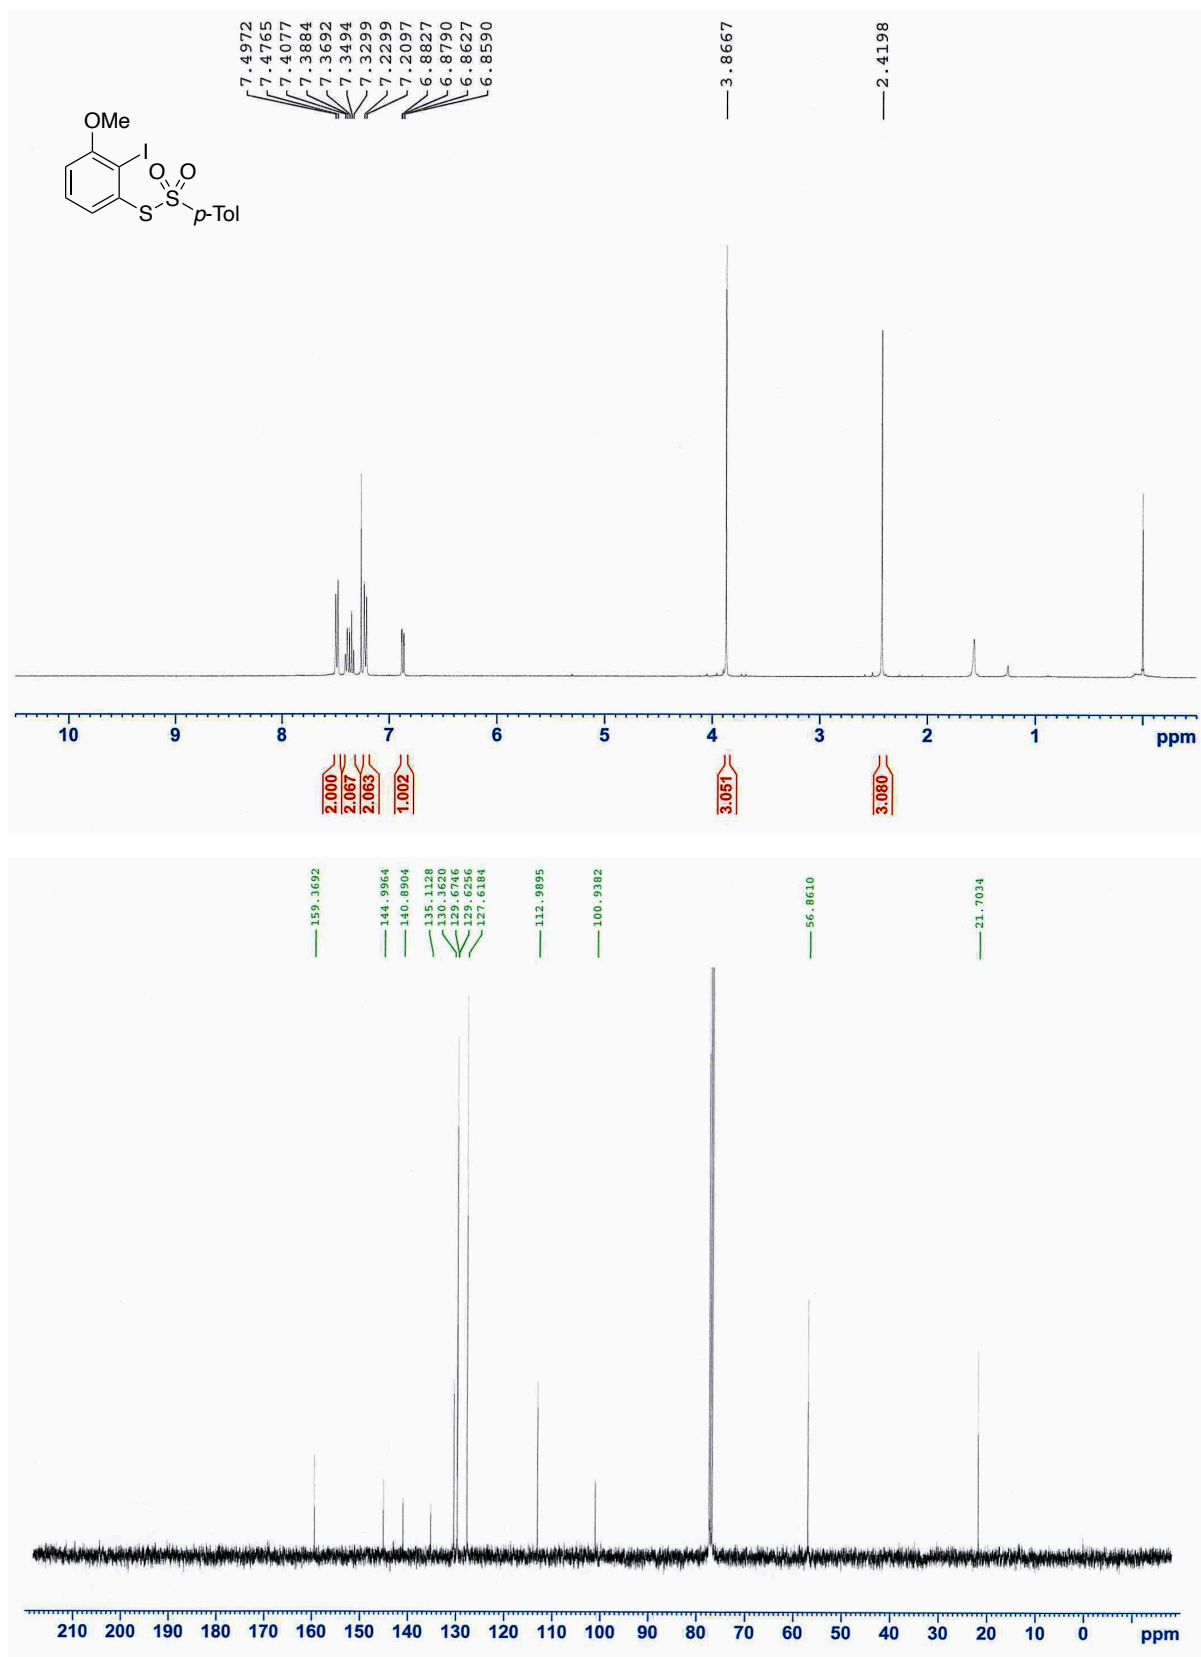

$^1\text{H}$  NMR (400 MHz) and  $^{13}\text{C}$  NMR (101 MHz) spectra of *S*-(2-iodo-3-((4-methoxyphenyl)thio)phenyl) 4-methylbenzenesulfonothioate (**10g**) ( $\text{CDCl}_3$ )

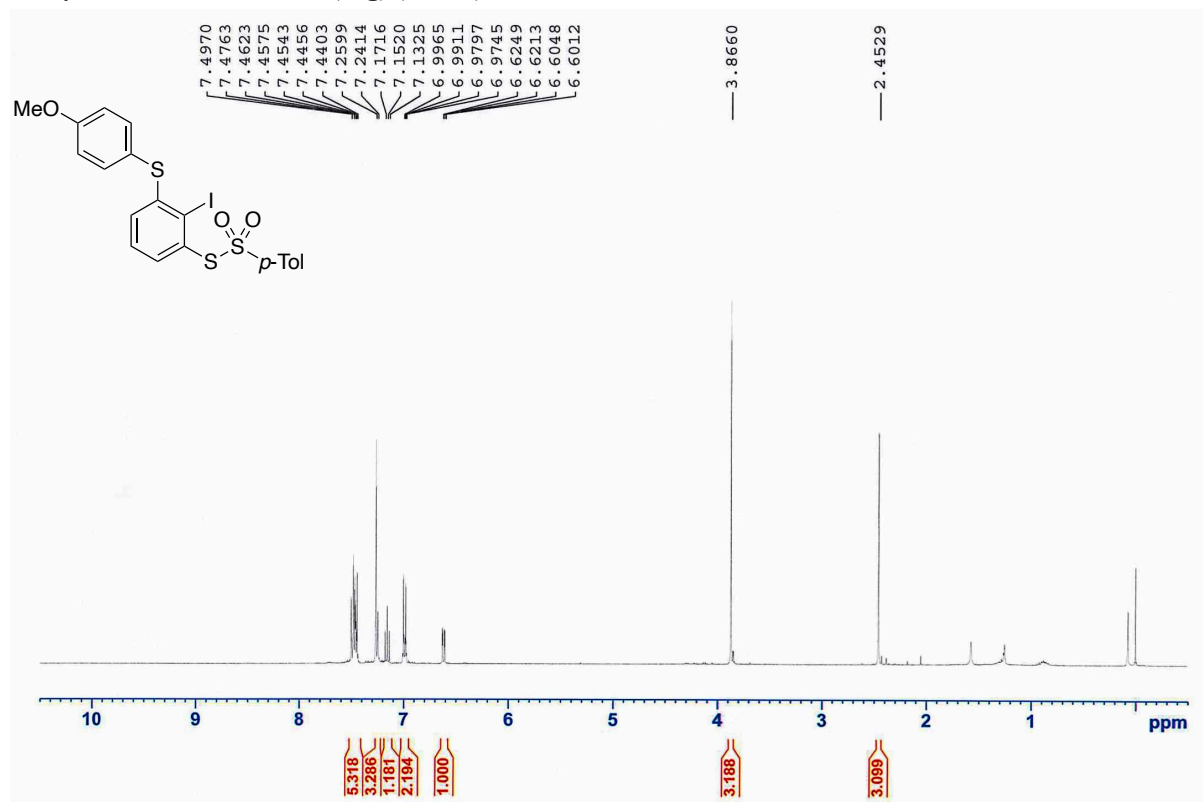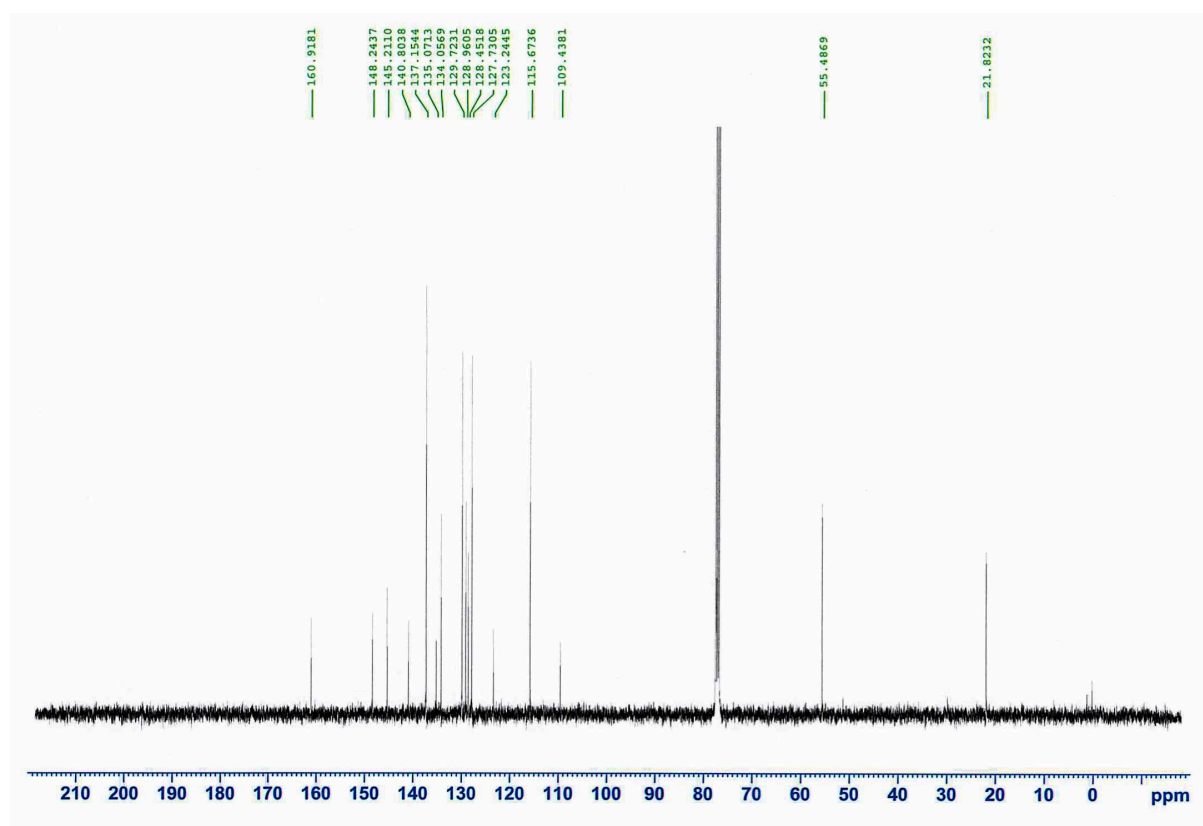

$^1\text{H}$  NMR (400 MHz) and  $^{13}\text{C}$  NMR (101 MHz) spectra of 3,8-dimorpholinodibenzo[*c,e*][1,2]dithiine (**4**) ( $\text{CDCl}_3$ )

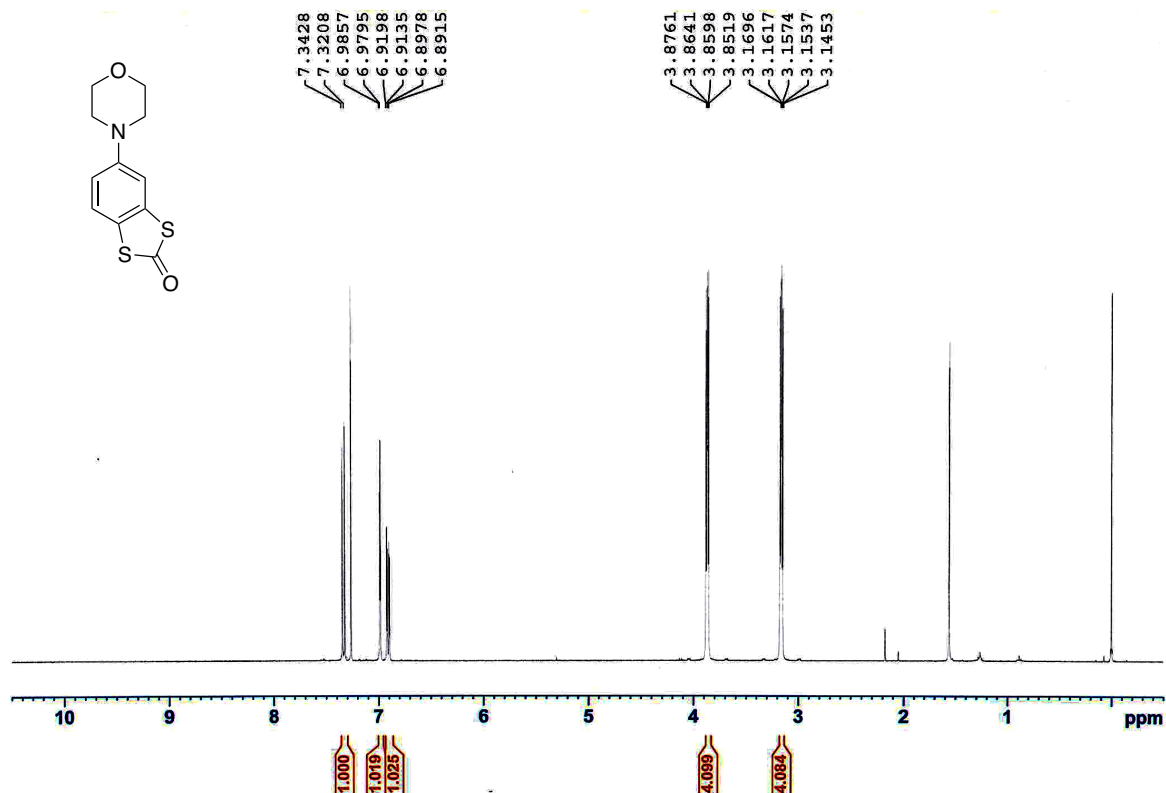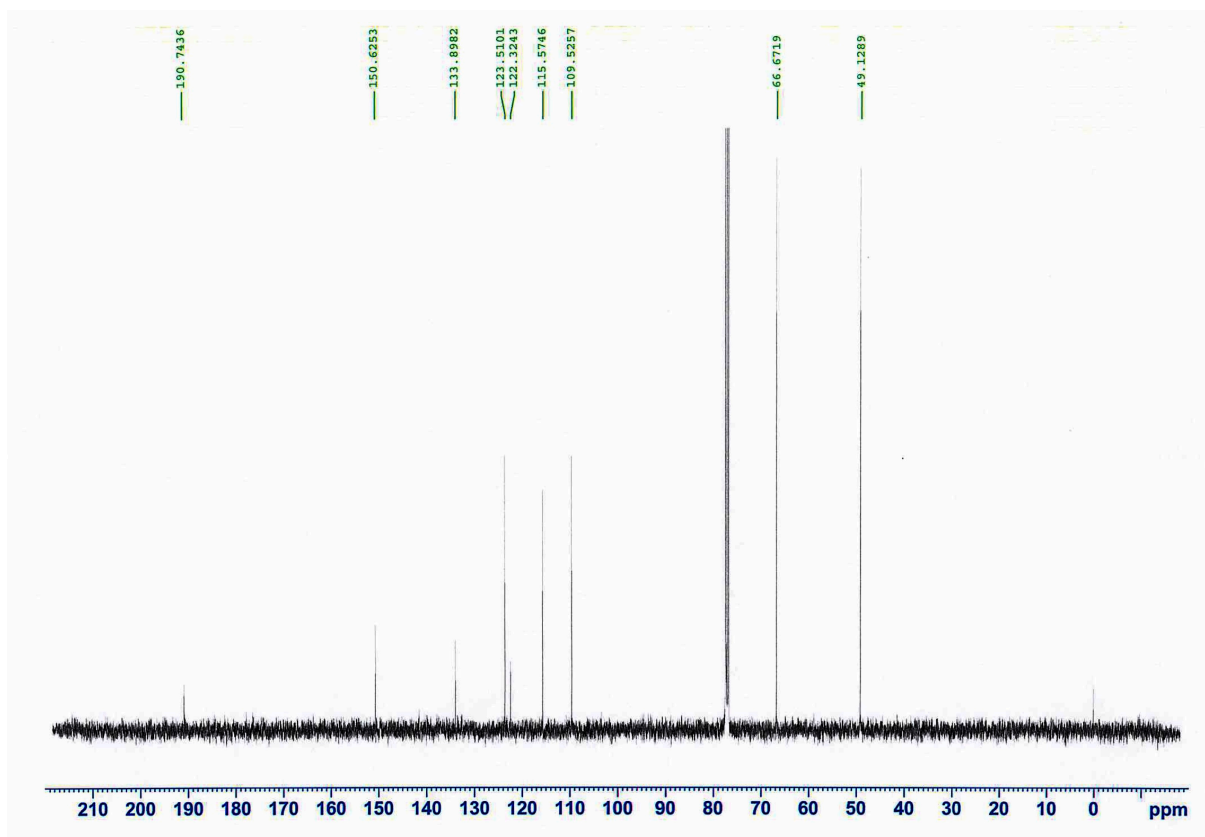

$^1\text{H}$  NMR (400 MHz) and  $^{13}\text{C}$  NMR (101 MHz) spectra of 1,2-bis(3,4-dimethylphenyl) disulfide (**11a**) ( $\text{CDCl}_3$ )

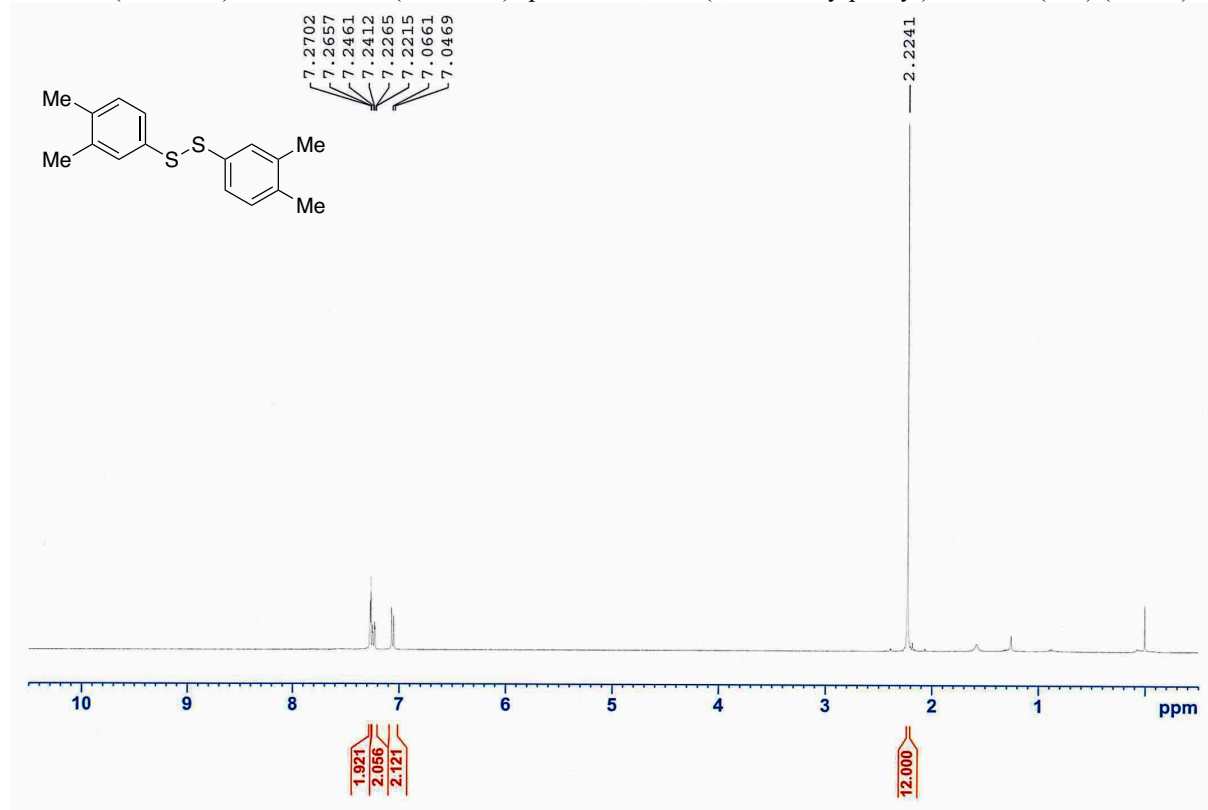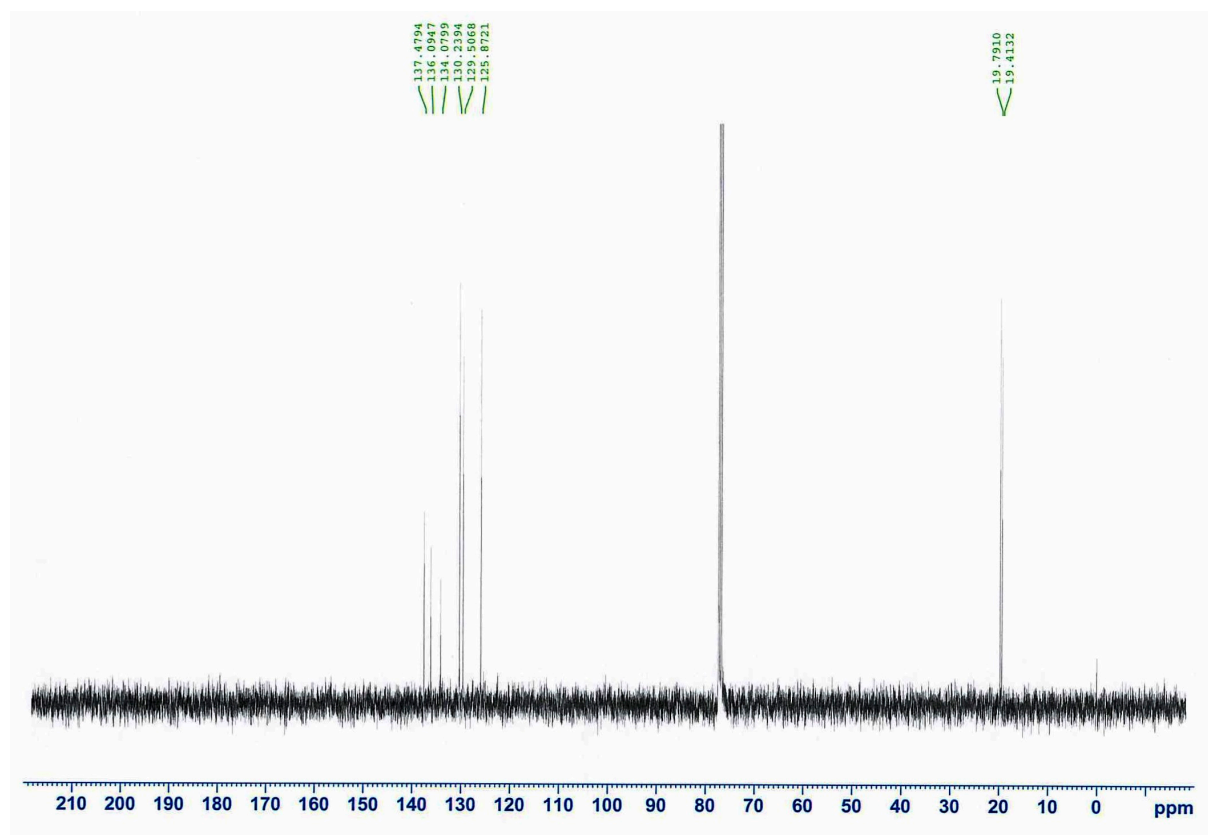

$^1\text{H}$  NMR (400 MHz) and  $^{13}\text{C}$  NMR (101 MHz) spectra of ethyl 4-((3,4-dimethylphenyl)thio)benzoate (**15b**) ( $\text{CDCl}_3$ )

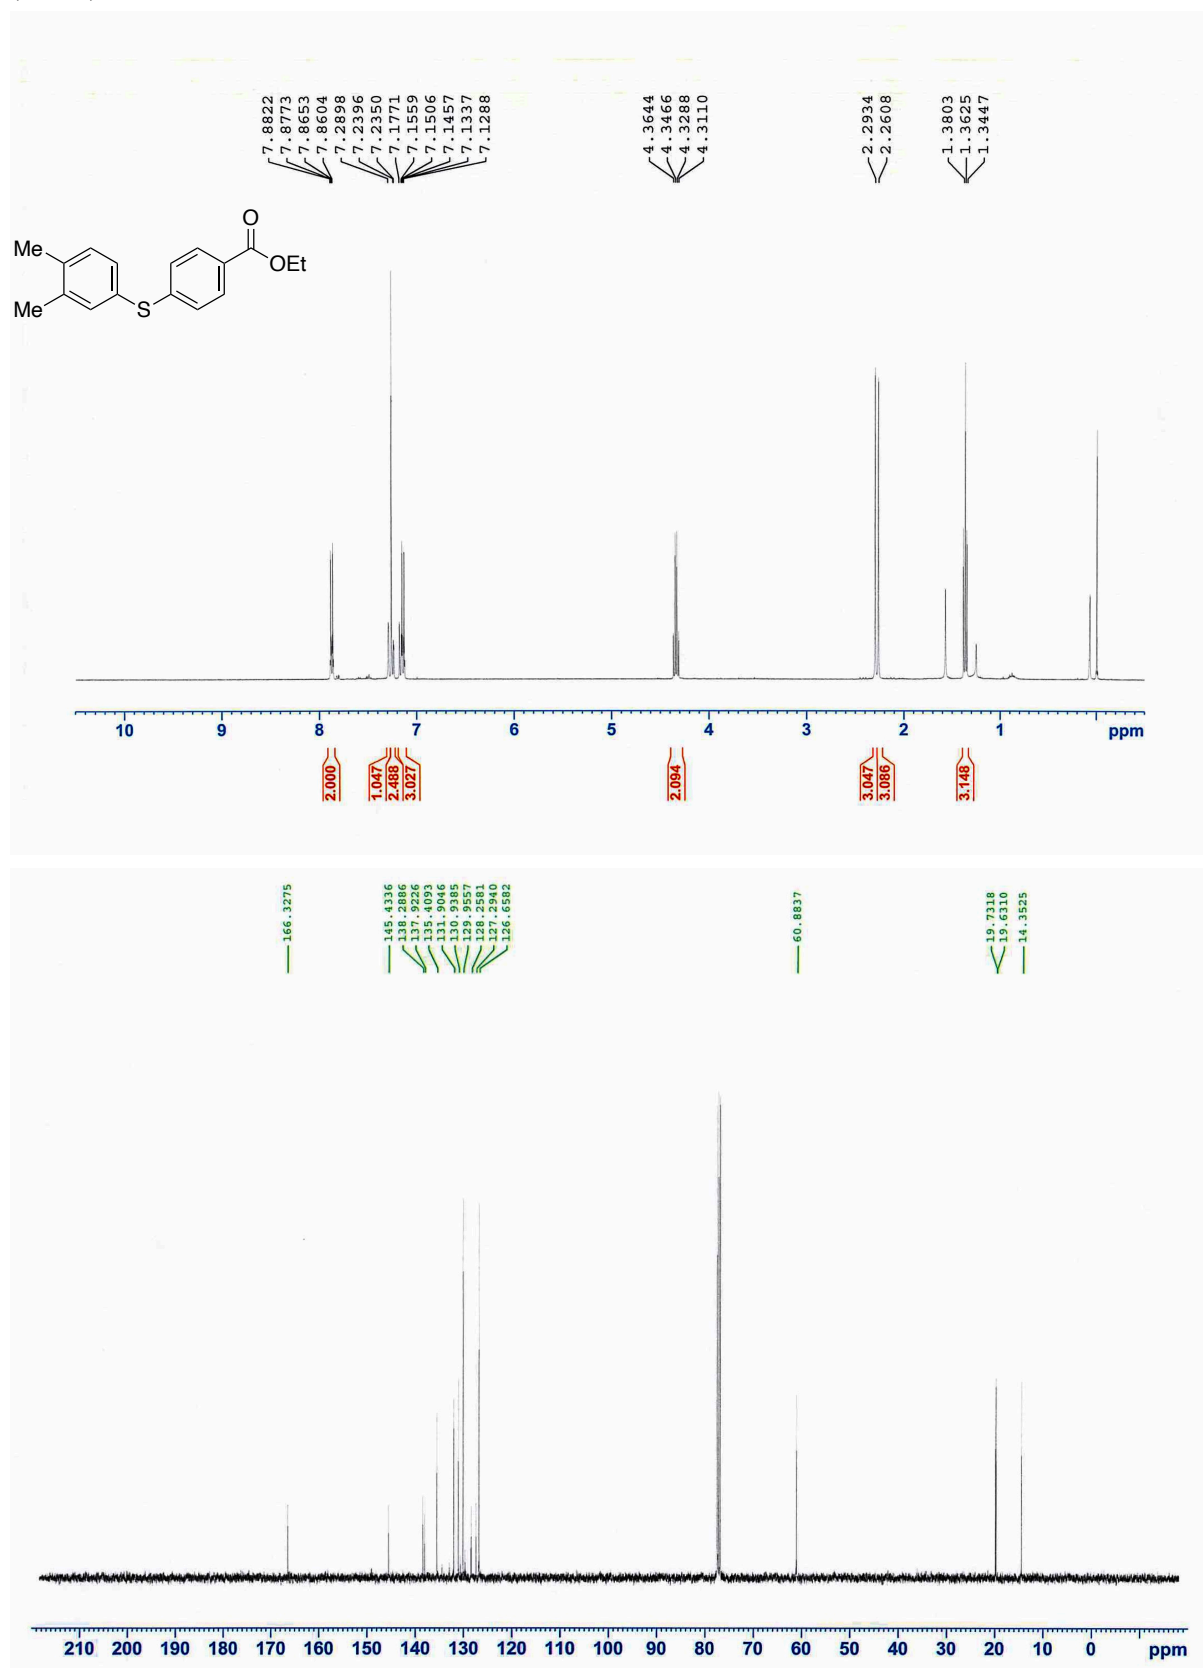

$^1\text{H}$  NMR (400 MHz) and  $^{13}\text{C}$  NMR (101 MHz) spectra of 3-((3,4-dimethylphenyl)thio)ethynylthiophene (**15c**) ( $\text{CDCl}_3$ )

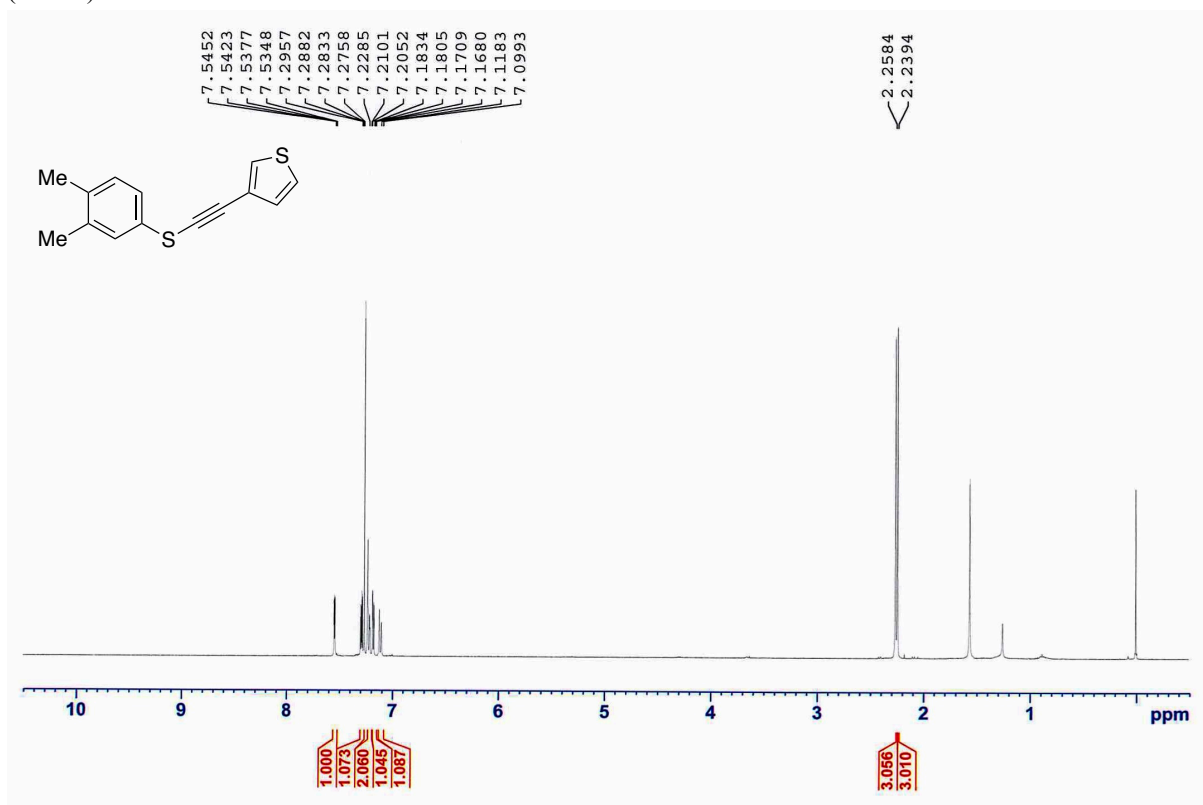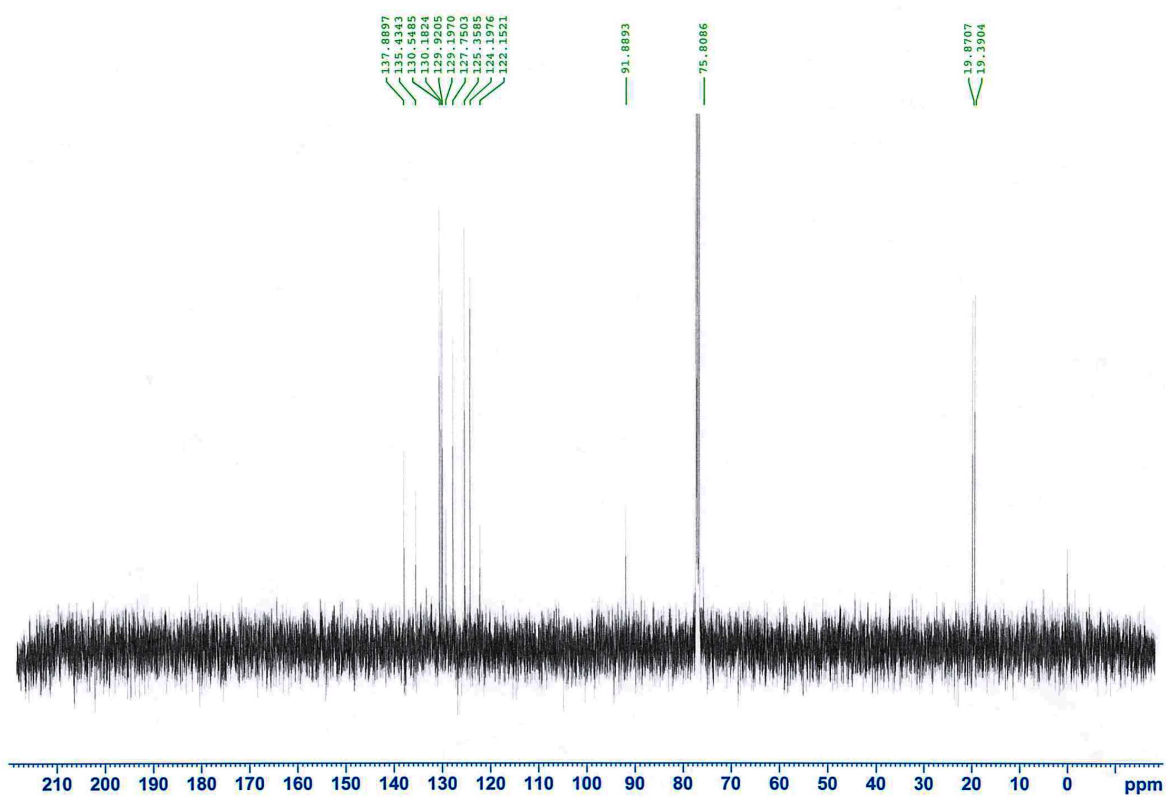

$^1\text{H}$  NMR (400 MHz) and  $^{13}\text{C}$  NMR (101 MHz) spectra of 2-bromo-4,5-difluorophenyl 3,5-dimethoxyphenyl sulfide ( $\text{CDCl}_3$ )

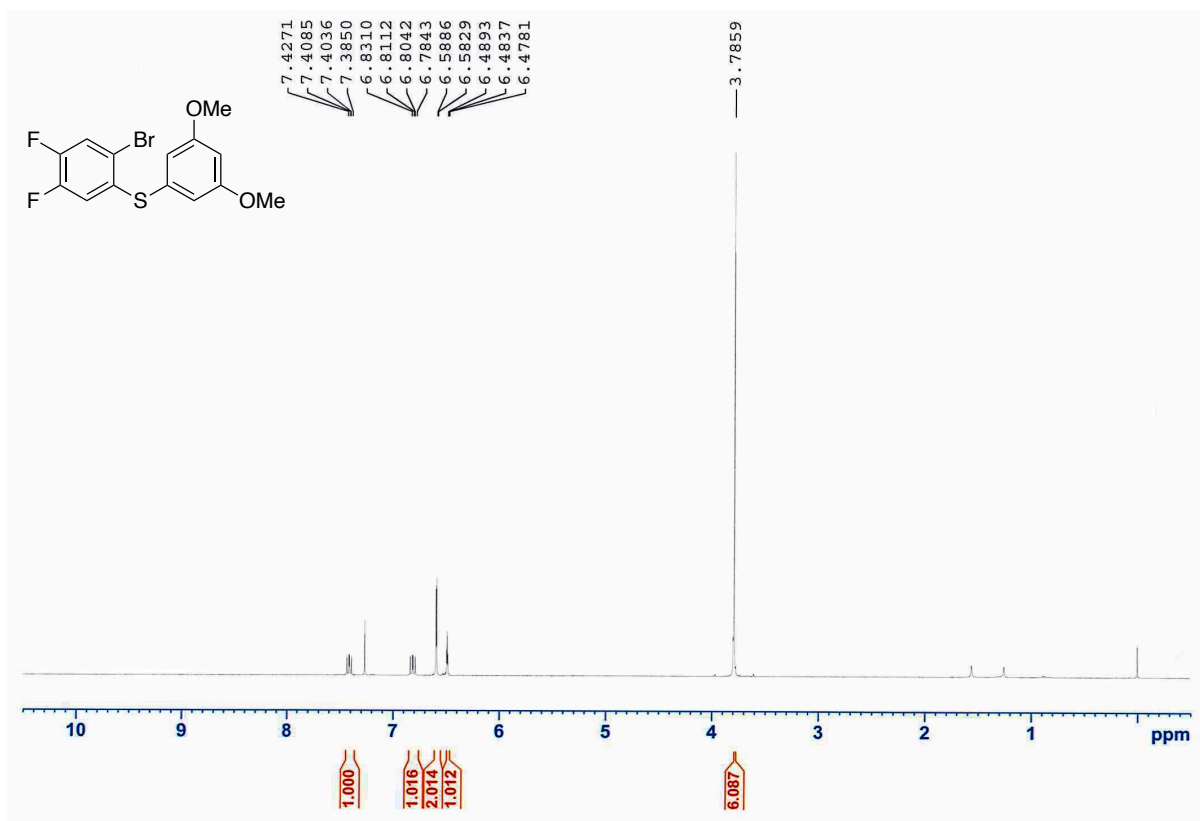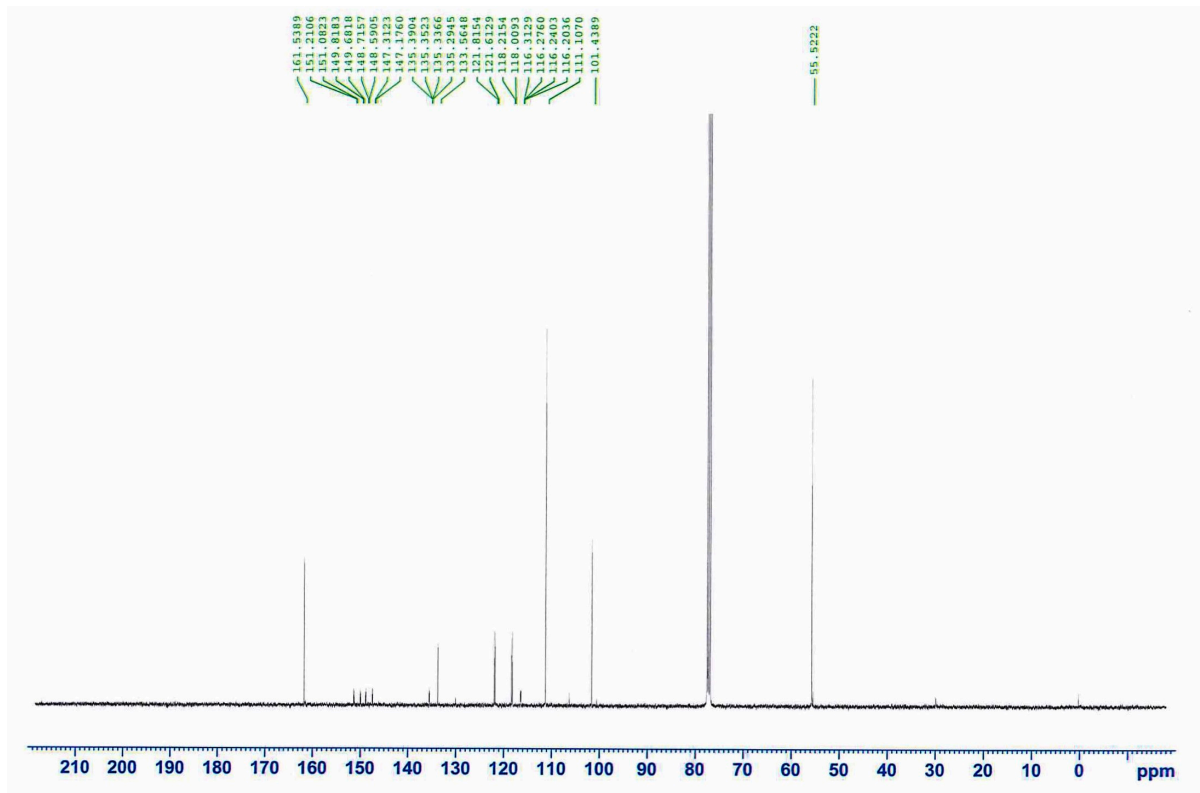

$^1\text{H}$  NMR (400 MHz) and  $^{13}\text{C}$  NMR (101 MHz) spectra of (2-bromo-5-fluoro-4-methoxyphenyl)(3,5-dimethoxyphenyl)- $\lambda^4$ -sulfanamine (**18d**) ( $\text{CDCl}_3$ )

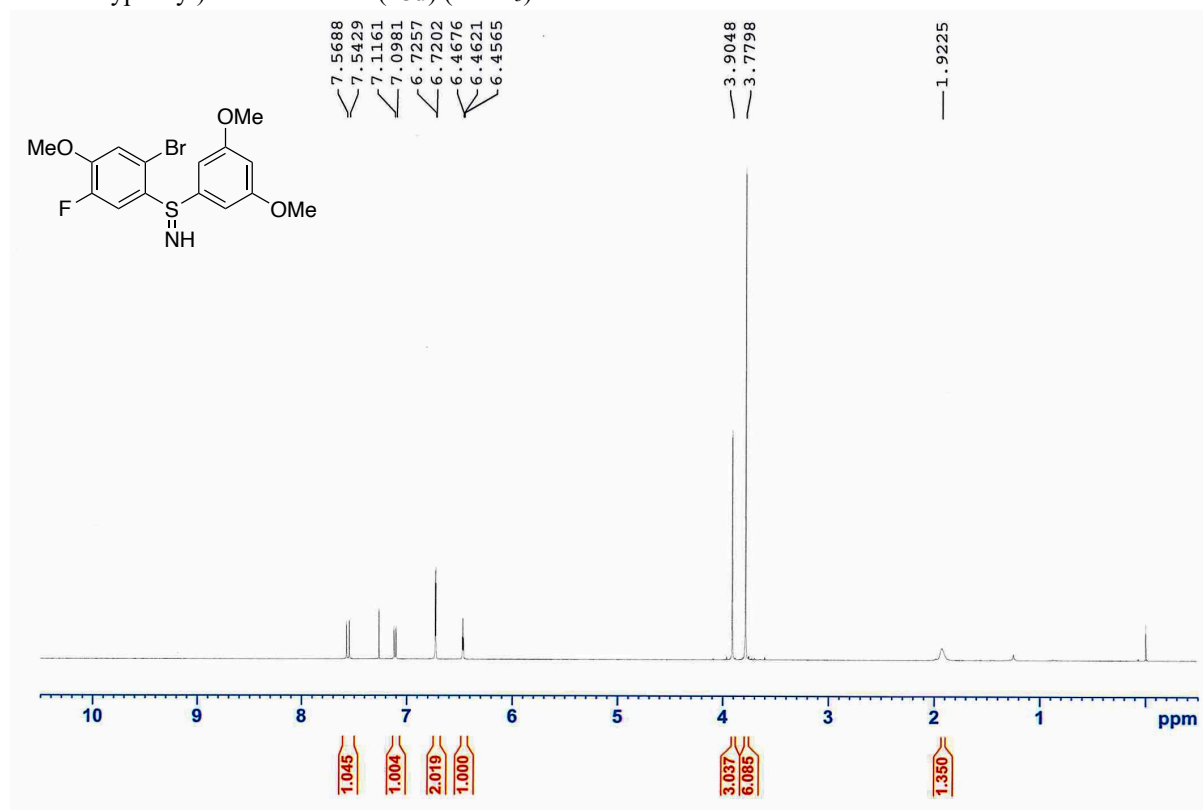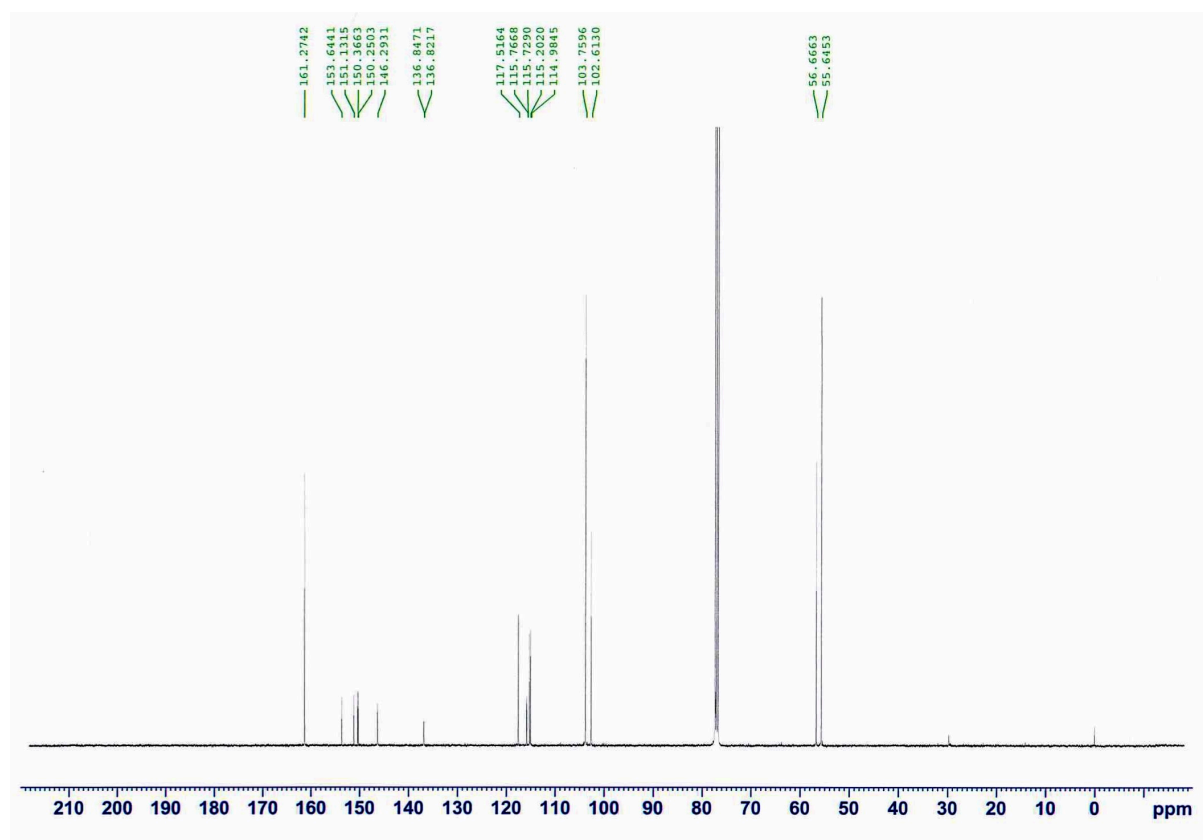

$^1\text{H}$  NMR (400 MHz) and  $^{13}\text{C}$  NMR (101 MHz) spectra of *N*-(2-Bromophenyl)-3-fluoro-2-(*p*-tolylthio)aniline (**20a**) ( $\text{CDCl}_3$ )

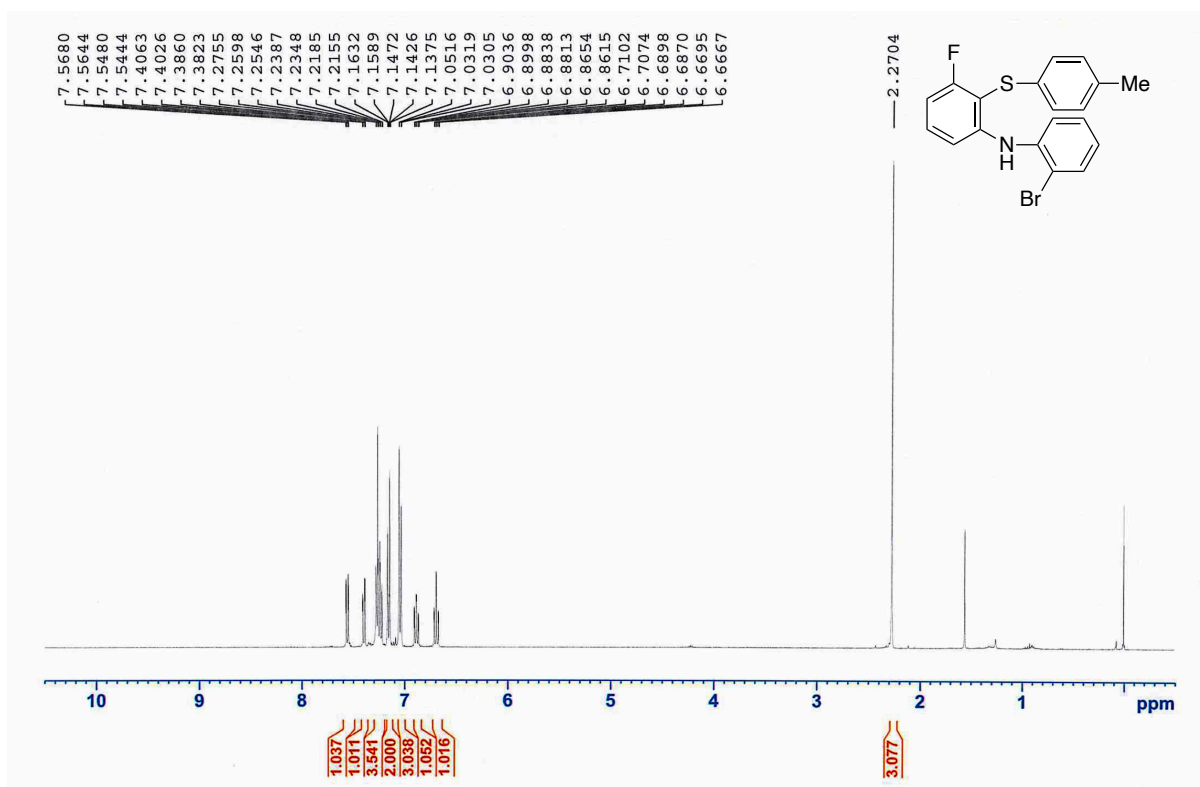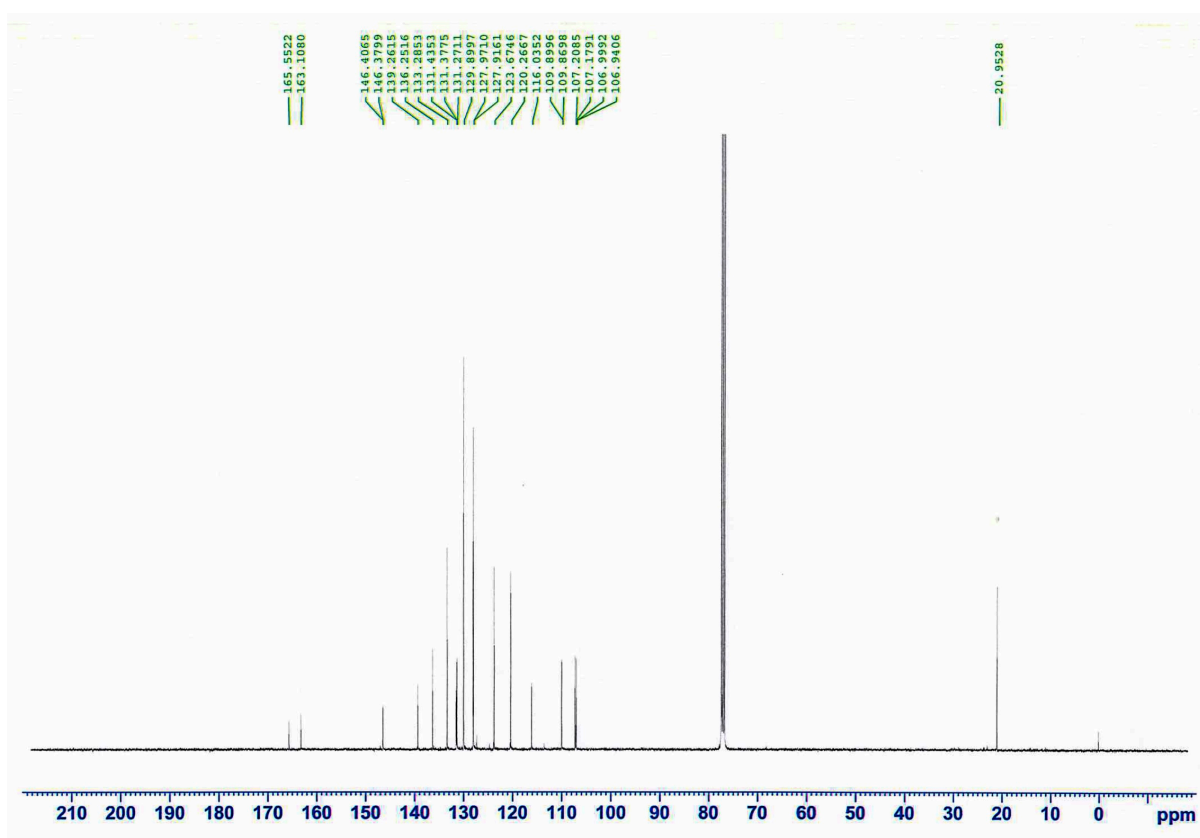

$^1\text{H}$  NMR (400 MHz) and  $^{13}\text{C}$  NMR (101 MHz) spectra of 3-(Benzyloxy)-*N*-(2-bromophenyl)-2-(*p*-tolylthio)aniline (**20b**) ( $\text{CDCl}_3$ )

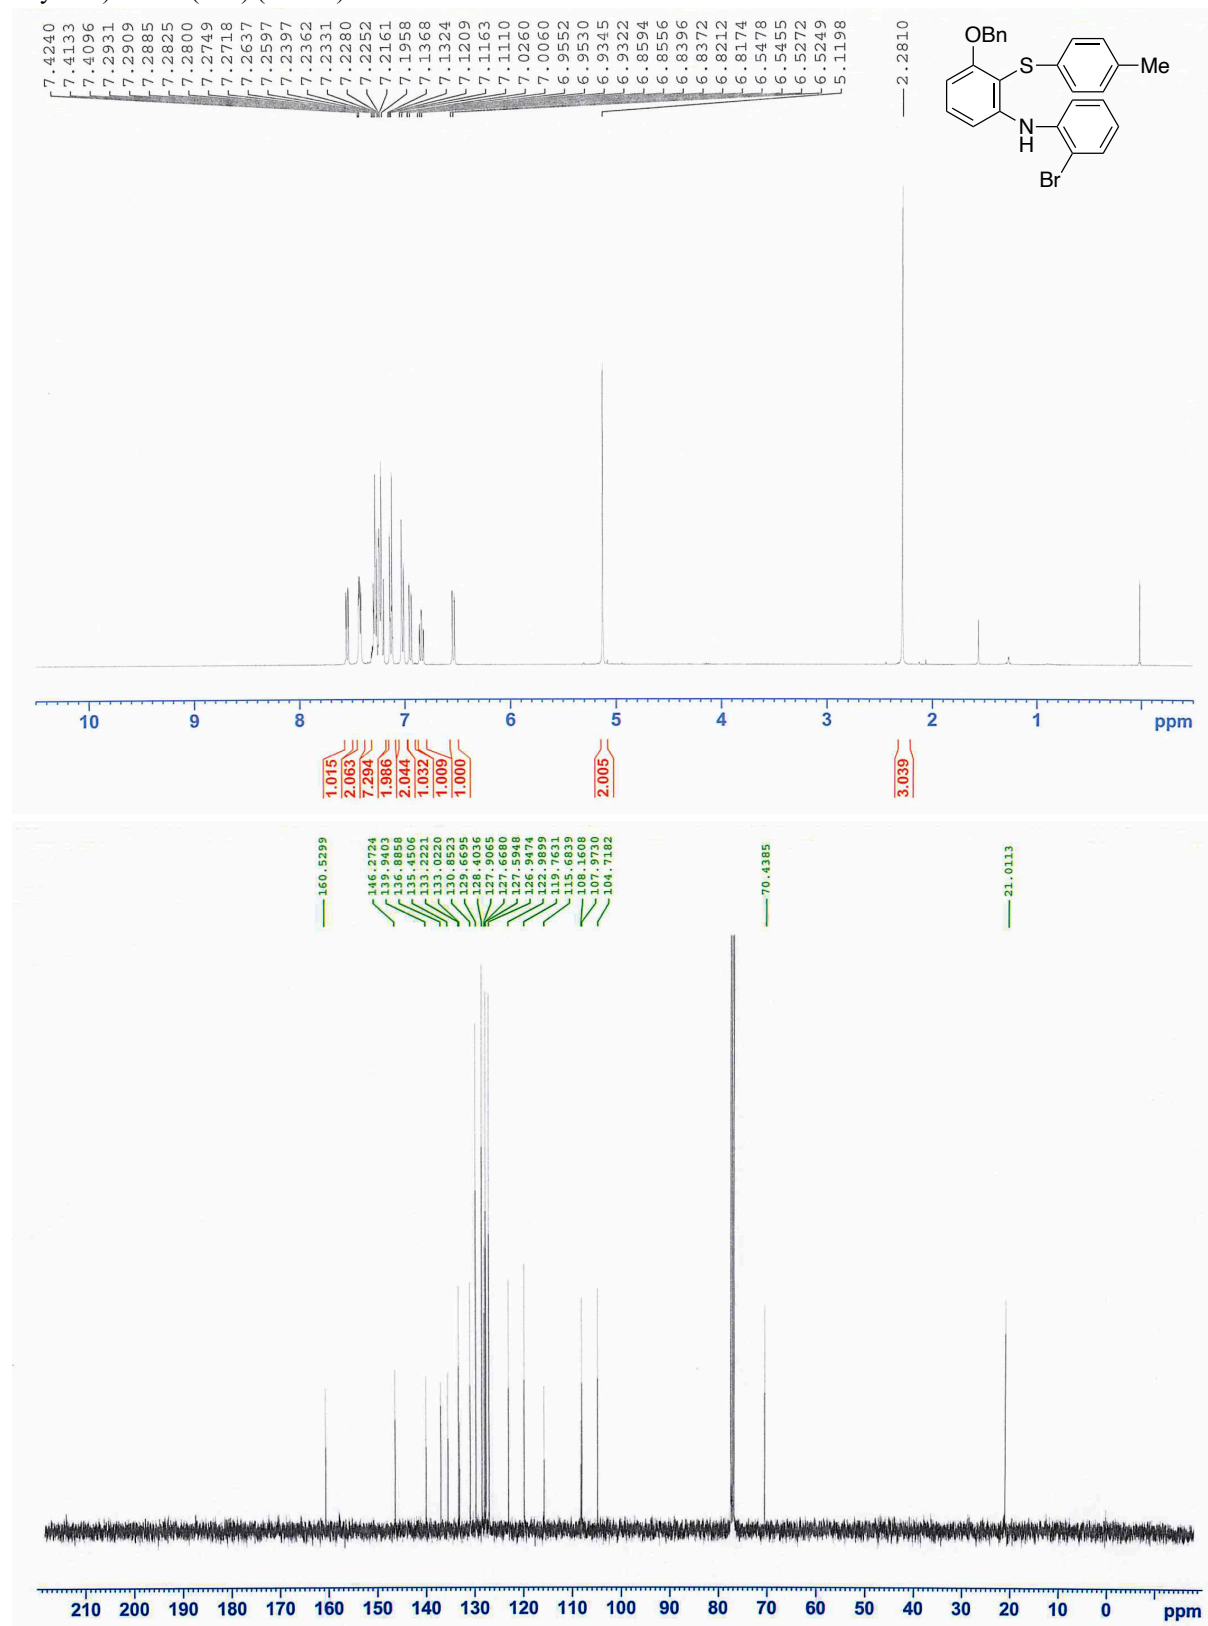

$^1\text{H}$  NMR (400 MHz) and  $^{13}\text{C}$  NMR (101 MHz) spectra of *N*-(2-Bromophenyl)-4-(*p*-tolylthio)dibenzo[*b,d*]furan-3-amine (**20c**) ( $\text{CDCl}_3$ )

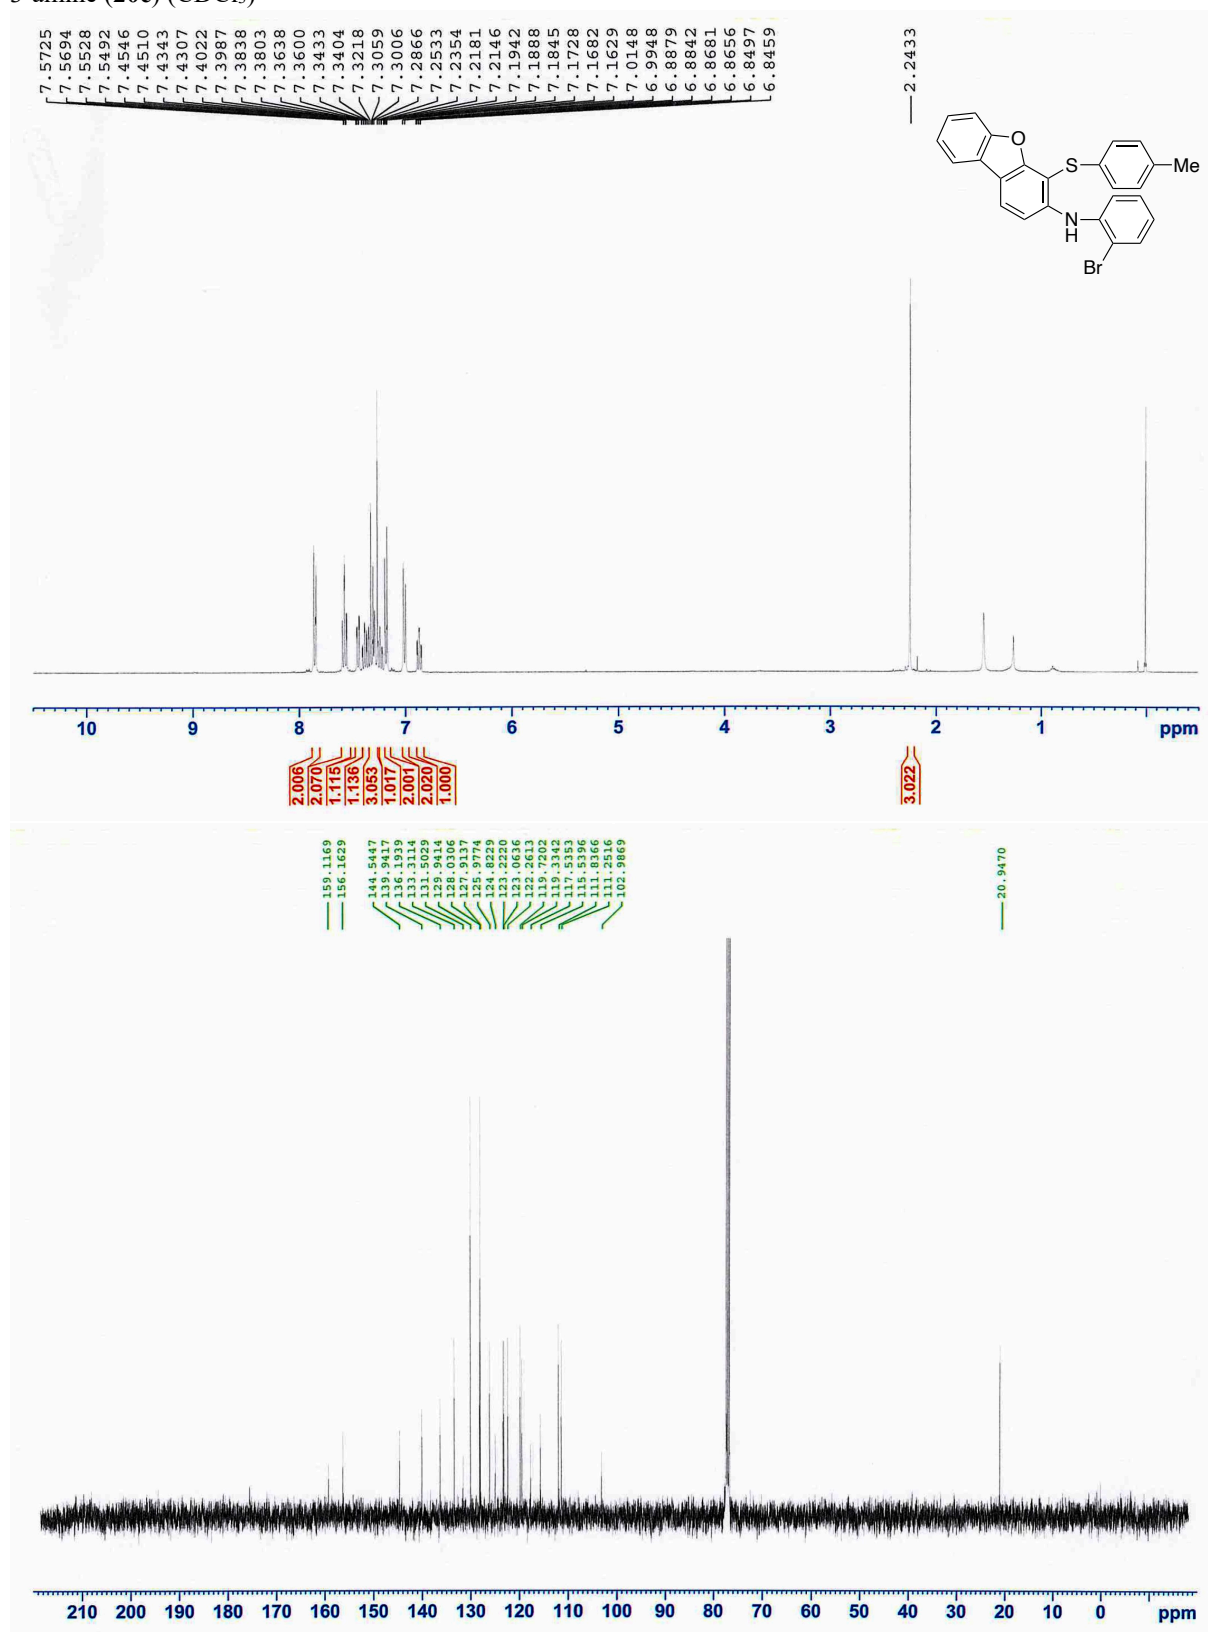

$^1\text{H}$  NMR (400 MHz) and  $^{13}\text{C}$  NMR (101 MHz) spectra of *N*-(2-bromo-5-fluoro-4-methoxyphenyl)-4-((3,5-dimethoxyphenyl)thio)dibenzo[*b,d*]furan-3-amine (**20d**) ( $\text{CDCl}_3$ )

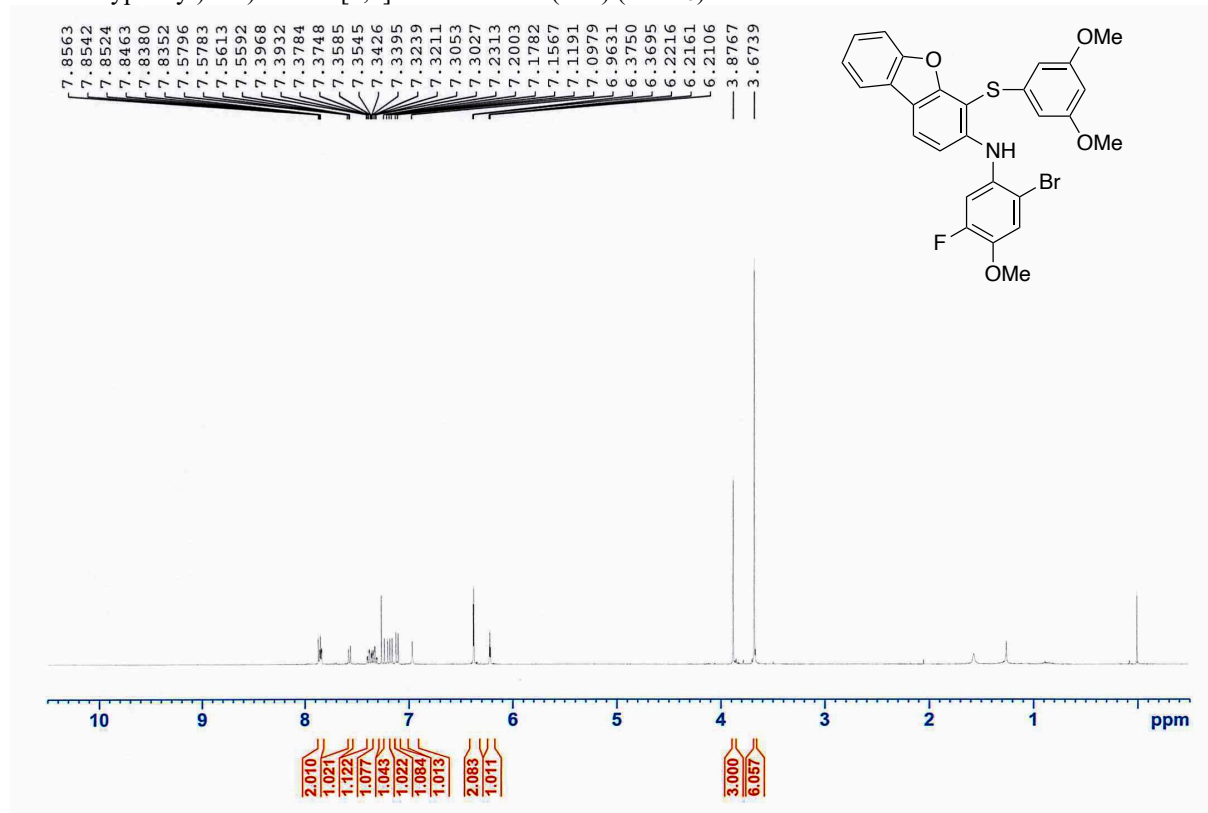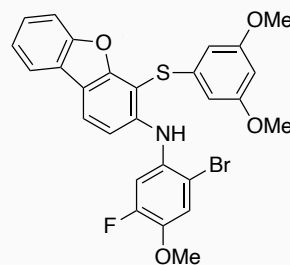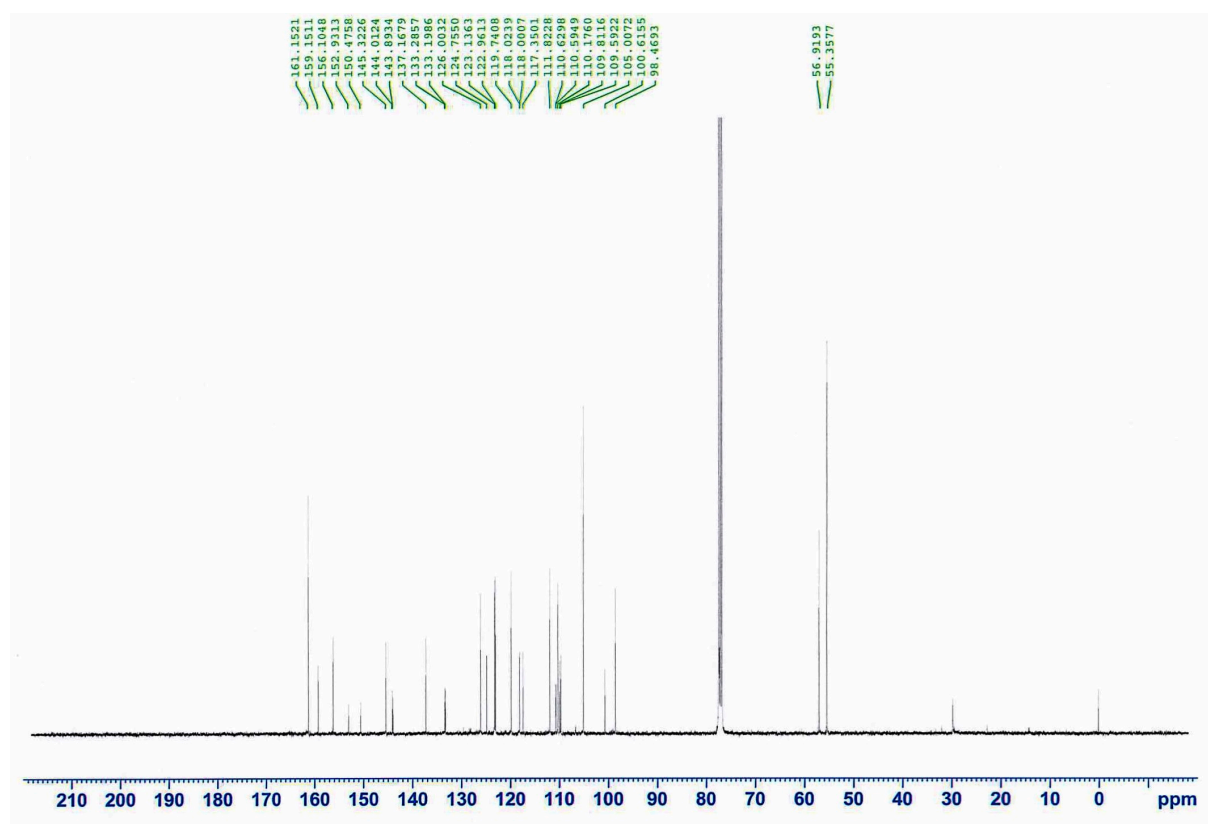

$^1\text{H}$  NMR (400 MHz) and  $^{13}\text{C}$  NMR (101 MHz) spectra of 4-fluoro-10-(*p*-tolyl)-10*H*-phenothiazine (**21a**) ( $\text{CDCl}_3$ )

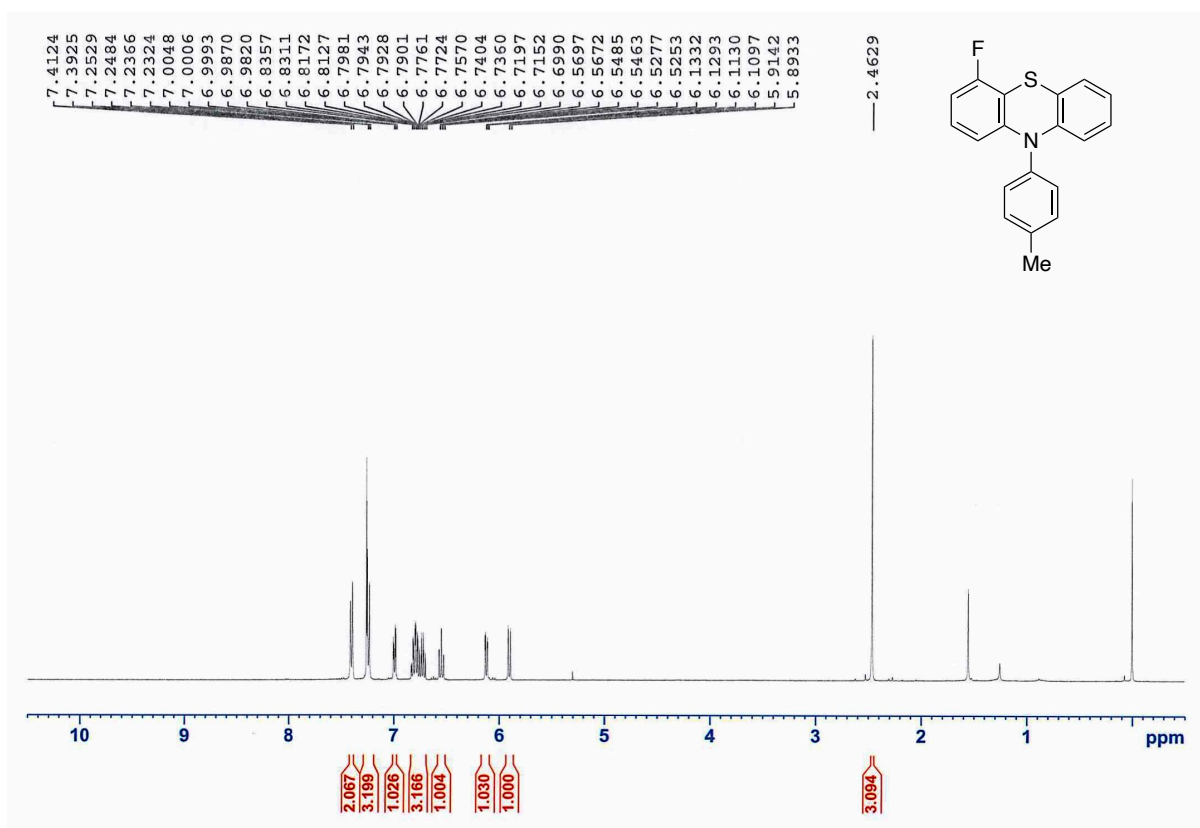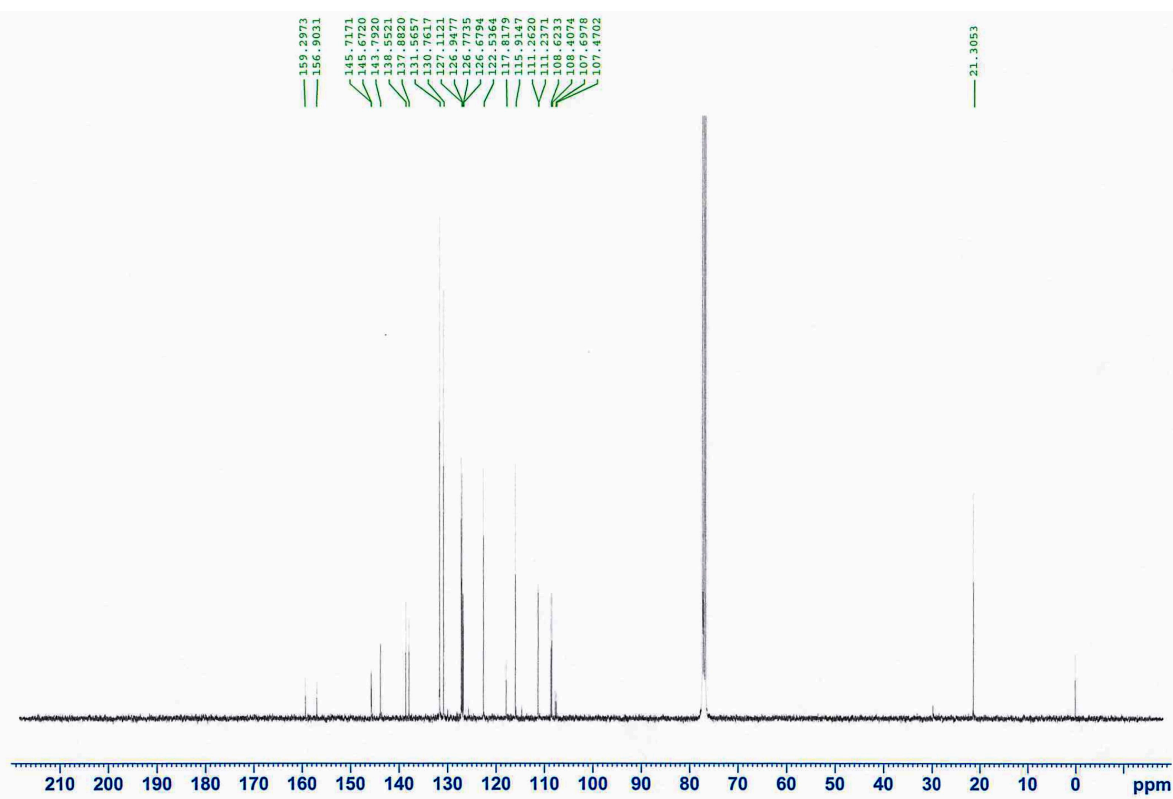

$^1\text{H}$  NMR (400 MHz) and  $^{13}\text{C}$  NMR (101 MHz) spectra of 4-(benzyloxy)-10-(*p*-tolyl)-10*H*-phenothiazine (**21b**) ( $\text{CDCl}_3$ )

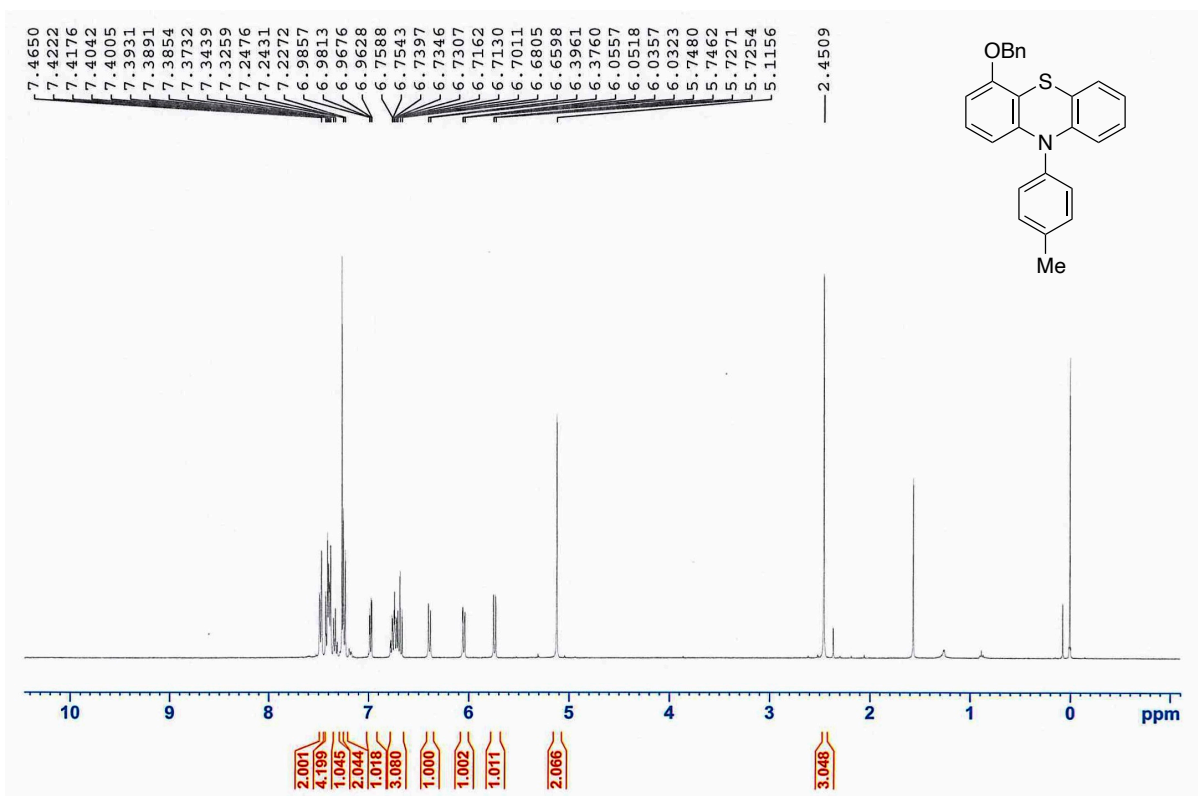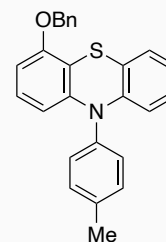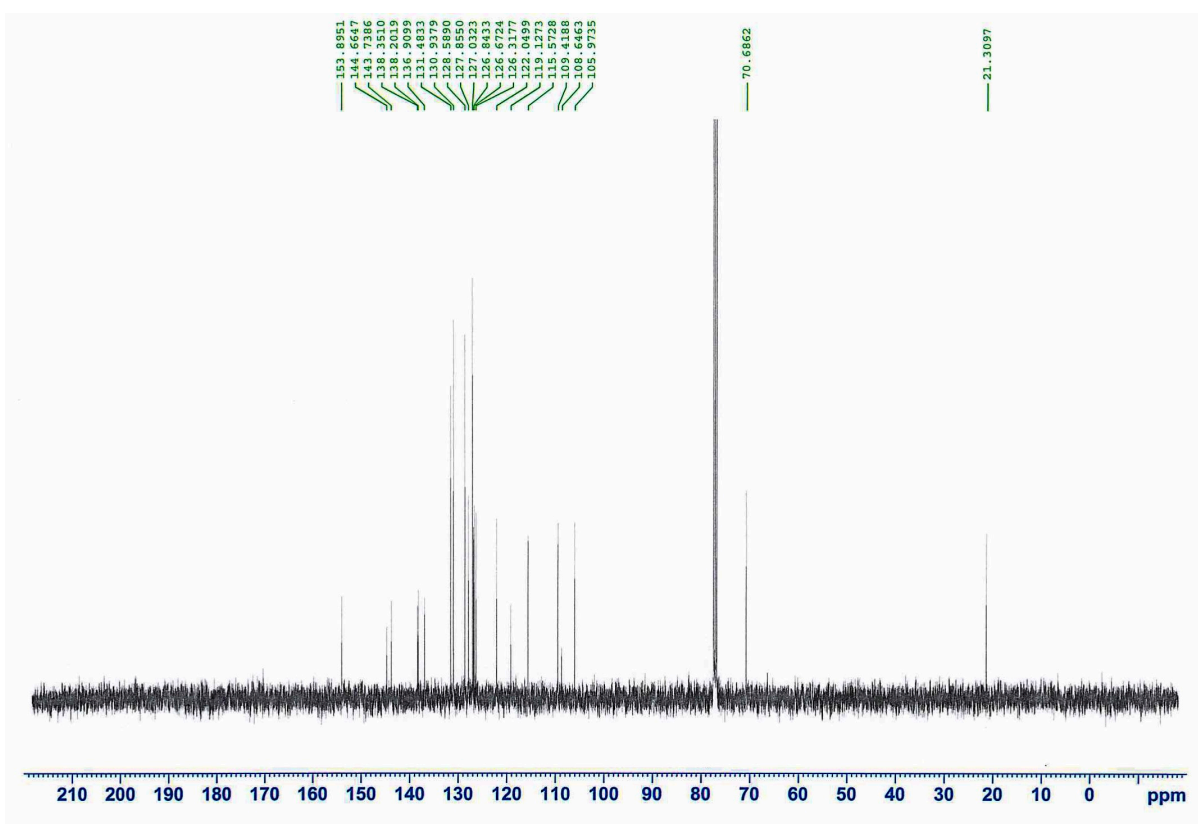

$^1\text{H}$  NMR (400 MHz) and  $^{13}\text{C}$  NMR (101 MHz) spectra of 5-(*p*-tolyl)-5*H*-benzofuro[3,2-*c*]phthalazine (**21c**) (acetone- $d_6$ )

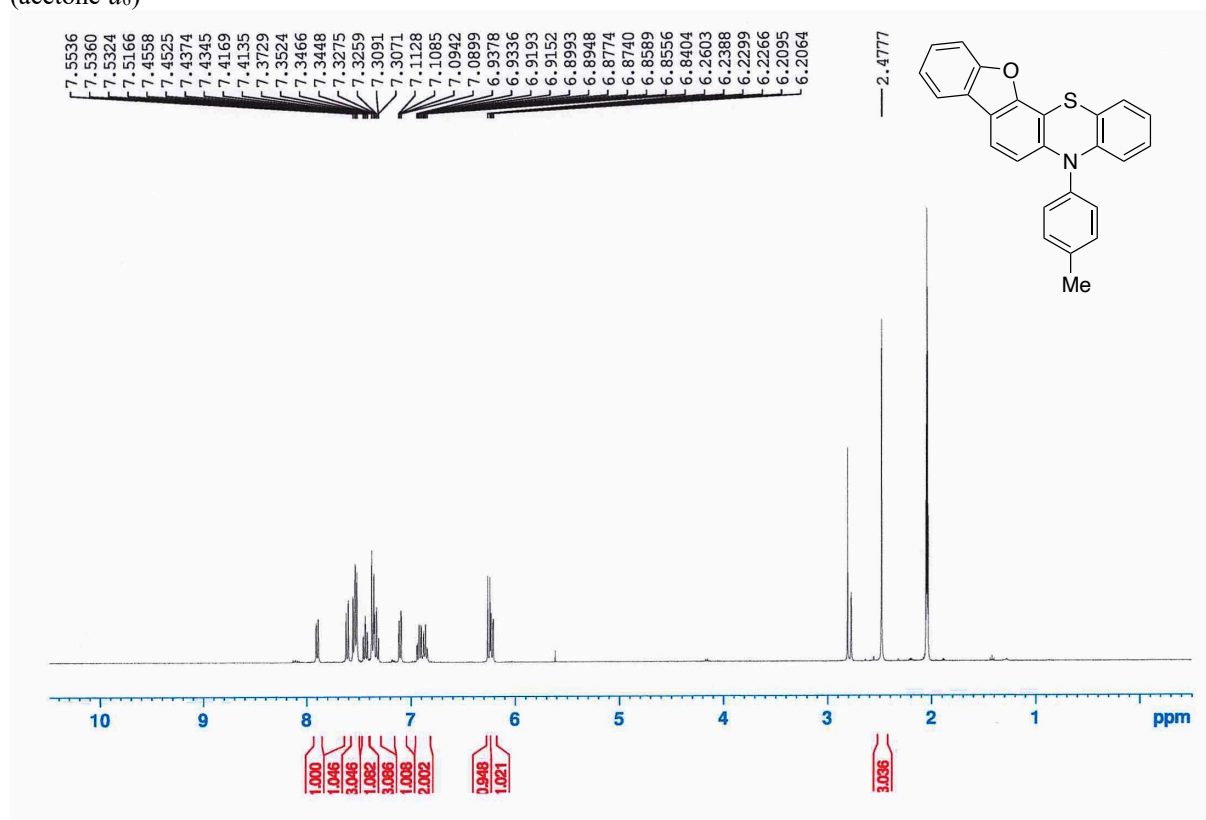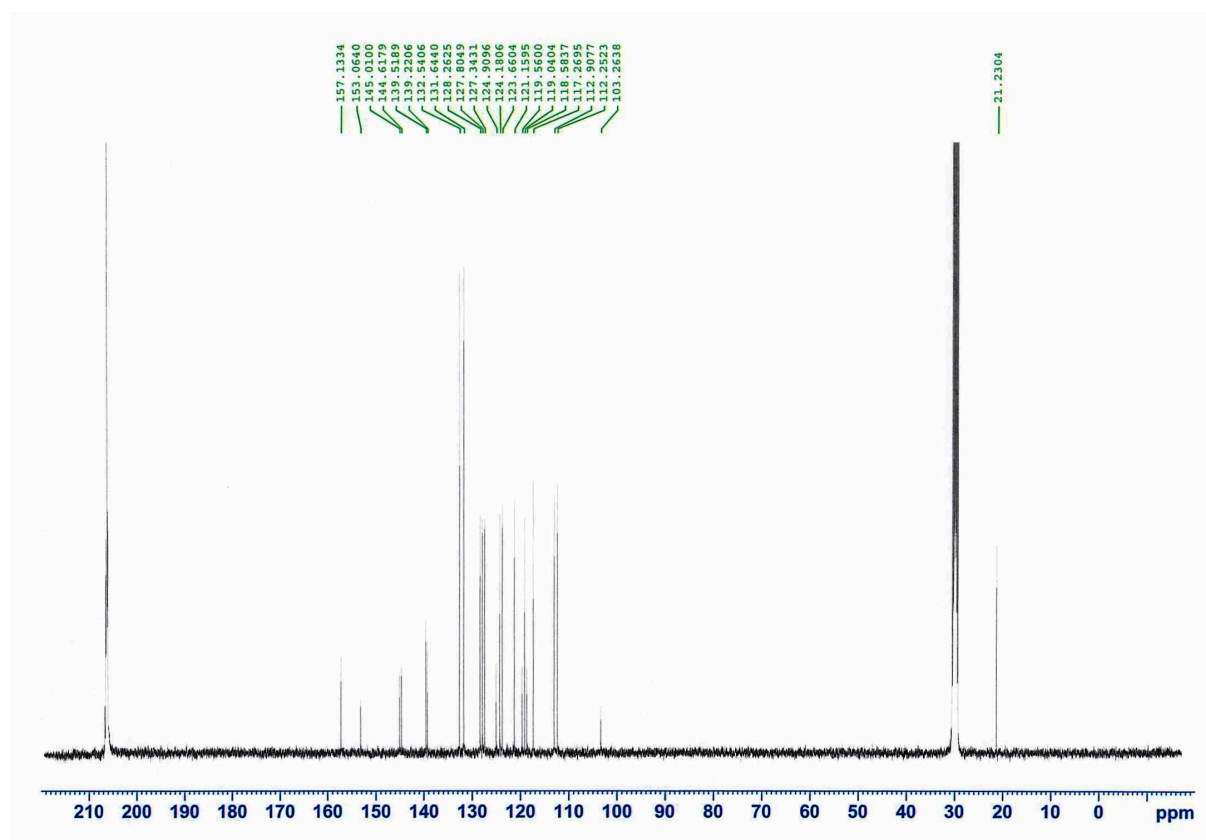

Supplement: d6cc01087c1.pdf [file d6cc01087c1.pdf]
